# Supplementary material for: Evolutionary Origin, Gradual Accumulation and Functional Divergence of Heat Shock Factor Gene Family with Plant Evolution
Source: Front Plant Sci. 2018 Feb 2;9:71. doi: 10.3389/fpls.2018.00071 (PMC5801592; doi:10.3389/fpls.2018.00071)
Supplement: Supplementary file 1 [file Table1.XLSX]

## Sheet: Supporting Information Table S1
Table S1. The species and their genome information used for HSF gene identification
	Species	Taxonomy	Database	Protein number	Genome size	HSF number	Ratio*1000
Eudicots	Arabidopsis_lyrata	Brassicaceae	Phytozome	32670	207Mb	35	1.07132
	Arabidopsis_thaliana	Brassicaceae	Phytozome	35386	135Mb	24	0.678234
	Boechera_stricta	Brassicaceae	Phytozome	29812	171.9 MB	31	1.03985
	Brassica_rapa	Brassicaceae	Phytozome	43370	283.8 MB	45	1.03758
	Capsella_rubella	Brassicaceae	Phytozome	28447	134.8 Mb	31	1.08975
	Carica_papaya	Caricaceae	Phytozome	27775	135Mb	18	0.648065
	Citrus_clementina	Rutaceae	Phytozome	33929	301.4 Mb	16	0.471573
	Citrus_sinensis	Rutaceae	Phytozome	46147	319 Mb	17	0.368388
	Cucumis_sativus	Cucurbitaceae	Phytozome	30364	203Mb	23	0.757476
	Eucalyptus_grandis	Myrtaceae	Phytozome	46280	691 Mb	35	0.756266
	Eutrema_salsugineum	Brassicaceae	Phytozome	29284	243.1 Mb	27	0.922005
	Fragaria_vesca	Rosaceae	Phytozome	32831	240Mb	15	0.456885
	Glycine_max	Fabaceae	Phytozome	88647	978Mb	52	0.586596
	Gossypium_raimondii	Malvaceae	Phytozome	77267	748.1 Mb	40	0.517685
	Linum_usitatissimum	Linaceae	Phytozome	43484	318.3 Mb	39	0.896882
	Malus_domestica	Rosaceae	Phytozome	63517	881.3 Mb	42	0.66124
	Manihot_esculenta	Euphorbiaceae	Phytozome	41381	582.25	32	0.773302
	Medicago_truncatula	Fabaceae	Phytozome	62319	360 Mb	26	0.417208
	Phaseolus_vulgaris	Fabaceae	Phytozome	31638	521.1 Mb	29	0.916619
	Populus_trichocarpa	Salicaceae	Phytozome	73013	422.9 Mb	30	0.410886
	Prunus_persica	Rosaceae	Phytozome	47089	227.4 Mb	18	0.382255
	Ricinus_communis	Euphorbiaceae	Phytozome	31221	400 Mb	19	0.608565
	salix_purpurea	Salicaceae	Phytozome	61520	392.0 MB	37	0.60143
	Theobroma_cacao	Malvaceae	Phytozome	44404	346 Mb	19	0.427889
	Vitis_vinifera	Vitaceae	Phytozome	26346	487Mb	19	0.721172
	Aquilegia_coerulea	Ranunculaceae	Phytozome	41063	302Mb	14	0.34094
	Mimulus_guttatus	Phrymaceae	Phytozome	33573	321.7Mb	21	0.625503
	Solanum_lycopersicum	Solanaceae	Phytozome	34727	900Mb	26	0.748697
	Solanum_tuberosum	Solanaceae	Phytozome	51472	800M	30	0.582841
Monocots	Brachypodium_distachyon	Poaceae	Phytozome	52972	272Mb	24	0.45307
	Hordeum_vulgare	Poaceae	ensemble plants release-31	62311	1356979403	18	0.288874
	Musa_acuminata	Musaceae	ensemble plants release-31	36519	472 Mb	43	1.17747
	Oryza_sativa	Poaceae	Phytozome	52424	372Mb	25	0.476881
	Panicum_virgatum	Poaceae	Phytozome	125439	1,230 Mb	43	0.342796
	Setaria_italica	Poaceae	Phytozome	43001	405.7 Mb	27	0.627892
	Sorghum_bicolor	Poaceae	Phytozome	47205	732.2 MB	24	0.508421
	Spirodela_polyrhiza	Araceae	Phytozome	19623	158 Mb	13	0.662488
	Triticum_aestivum	Poaceae	ensemble plants release-31	100344	6591 Mb	53	0.528183
	Zea_mays	Poaceae	Phytozome	88760	3234 Mb	28	0.315457
Basal angiosperms	Amborella_trichopoda	Amborellaceae	Phytozome	26846	870 Mb	12	0.446994
Gymnosperms	Picea_abies	Pinaceae	ConGenIE	66632		21	0.315164
	Pinus_taeda	Pinaceae	ConGenIE	91046		30	0.329504
	Ginkgo_biloba	Ginkgoaceae	GigaDB	41840		8	0.191205
Pteridophyta	Selaginella_moellendorffii	Selaginellaceae	Phytozome	22285	212.5Mb	7	0.314113
Bryophyta	Physcomitrella_patens	Funariaceae	Phytozome	87533	473Mb	8	0.0913941
	sphagnum_fallax	Sphagnaceae	Phytozome	32298	395 Mb	10	0.309617
Chlorophyta	Chlamydomonas_reinhardtii	Chlamydomonadaceae	Phytozome	19526	111.1 Mb	2	0.102428
	Coccomyxa_subellipsoidea_C-169	Trebouxiophyceae	Phytozome	9629	49.0 Mbp	0	0
	Micromonas_pusilla_CCMP1545	Mamiellophyceae	Phytozome	10660	22 Mb	4	0.375235
	Ostreococcus_lucimarinus	Bathycoccaceae	Phytozome	7796	13.2 Mbp	1	0.128271
	Volvox_carteri	Chlorophyceae	Phytozome	16075	131.2 Mb	2	0.124417
Vertebrates	Anolis_carolinensis	Squamata	ensemble release-84	19177		4	0.208583
	Danio_rerio	Cypriniformes	ensemble release-84	44888	1464443456	4	0.0891107
	Gallus_gallus	Galliformes	ensemble release-84	16354	1072544763	5	0.305736
	Homo_Sapiens	Primates	ensemble release-84	102450	3547762741	8	0.0780869
	Mus_musculus	Rodentia	ensemble release-84	57751	3482010803	6	0.103894
	Pan_troglodytes	Primates	ensemble release-84	19907	2995917117	5	0.251168
	Xenopus_tropicalis	Anura	ensemble release-84	22718	1358346944	6	0.264108
Invertebrates	Caenorhabditis_elegans	Rhabditida	ensemble release-84	30939	103022290	1	0.0323217
	Ciona_intestinalis	Enterogona	ensemble release-84	17302		1	0.0577968
	Drosophila_melanogaster	Diptera	ensemble release-84	30362	142573017	1	0.0329359
