# Supplementary material for: Evolutionary Origin, Gradual Accumulation and Functional Divergence of Heat Shock Factor Gene Family with Plant Evolution
Source: Front Plant Sci. 2018 Feb 2;9:71. doi: 10.3389/fpls.2018.00071 (PMC5801592; doi:10.3389/fpls.2018.00071)
Supplement: Supplementary file 2 [file Table2.XLSX]

## Sheet: Supporting Information Table S2
Table S2. The identified HSF genes and their annotations based on PFAM and Heatster databases
Taxonomy	Speciece name	Sequence_id	Sequence	PFAM annotation			Heatster Annotation											MARCOIL Annotation
			length	Domain	Start	End	Category	E value	DBD	HR-A	HR-B	DBD	HR-A/B	NLS	AHA	NES	RD	Start	End
Eudicots	Aquilegia_coerulea	Aquca_015_00048.1	347	HSF_DNA-bind	25	114	B4	9.7e-169	yes	yes	yes	22-115	185-221	311-314		328-340	301-307	162	218
	Aquilegia_coerulea	Aquca_039_00029.1	450	HSF_DNA-bind	14	103	A4	1.7e-230	yes	yes	yes	11-104	127-184	202-205	254-263/385-394	436-443		115	206
	Aquilegia_coerulea	Aquca_020_00446.1	384	HSF_DNA-bind	65	154	A2	1.8e-139	yes	yes	yes	62-155	169-233	249-262	285-293/320-327	375-379		4	23
	Aquilegia_coerulea	Aquca_017_00542.1	386	HSF_DNA-bind	68	157	A6	3.7e-169	yes	yes	yes	65-158	174-238	253-267	343-352	370-380		177	277
	Aquilegia_coerulea	Aquca_084_00048.1	174	HSF_DNA-bind	7	97	B5	2.2e-86	yes	yes	yes	23-98	127-167
	Aquilegia_coerulea	Aquca_004_00776.1	272	HSF_DNA-bind	25	114	B4	2.6e-129	yes	yes	yes	22-115	159-195	262-265			252-258	151	188
	Aquilegia_coerulea	Aquca_005_00532.1	511	HSF_DNA-bind	23	112	A1	1.2e-247	yes	yes	yes	20-113	136-200	218-228	448-457	496-503		136	232
	Aquilegia_coerulea	Aquca_015_00059.1	291	HSF_DNA-bind	10	99	B1	8.5e-114	yes	yes	yes	7-100	157-194				237-243	138	197
	Aquilegia_coerulea	Aquca_014_00743.1	215	HSF_DNA-bind	22	111	B3	5.3e-97	yes	yes	yes	19-112	153-188					115	199
	Aquilegia_coerulea	Aquca_034_00075.1	482	HSF_DNA-bind	24	113	-	-	yes	no	yes	21-114	160-190	201-216	428-437	468-475		123	194
	Aquilegia_coerulea	Aquca_001_00047.1	364	HSF_DNA-bind	47	136	A2	8.4e-133	yes	yes	yes	44-137	151-215	231-244	288-296/ 318-325			152	233
	Aquilegia_coerulea	Aquca_009_00974.1	501	HSF_DNA-bind	75	164	A3	4.2e-172	yes	yes	yes	72-165	194-240	266-275	416-422/ 435-440/453-462/470-476			180	264
	Aquilegia_coerulea	Aquca_002_01276.1	424	HSF_DNA-bind	13	102	A8	2.6e-108	yes	yes	yes	11-118	202-259	378-386	364-373			181	262
	Aquilegia_coerulea	Aquca_001_00485.1	277	HSF_DNA-bind	10	99	C1	9.2e-104	yes	yes	yes	7-101	124-167	188-193				87	98
	Mimulus_guttatus	Migut.F00357.1.p	347	HSF_DNA-bind	27	116	B2	3e-152	yes	yes	yes	24-117	176-212	291-295			282-288	163	222
	Mimulus_guttatus	Migut.A00803.1.p	316	HSF_DNA-bind	29	118	B2	2.5e-154	yes	yes	yes	26-119	193-229	281-285			272-278	184	232
	Mimulus_guttatus	Migut.M00999.1.p	414	HSF_DNA-bind	16	105	A4	6.9e-192	yes	yes	yes	13-106	130-187	205-208	268-277/ 349-358	400-407		116	197
	Mimulus_guttatus	Migut.E00782.1.p	482	HSF_DNA-bind	36	125	A1	3.9e-202	yes	yes	yes	33-126	150-214	234-244	419-428	467-474		150	222
	Mimulus_guttatus	Migut.G00383.1.p	309	HSF_DNA-bind	16	105	A6	4.5e-128	yes	yes	yes	13-106	121-185	201-208	290-299			121	218
	Mimulus_guttatus	Migut.N02718.1.p	389	HSF_DNA-bind	25	114	B4	1.6e-179	yes	yes	yes	22-115	213-249	352-355		371-383	342-348	205	243
	Mimulus_guttatus	Migut.J01747.1.p	242	HSF_DNA-bind	25	114	B3	1.6e-132	yes	yes	yes	22-115	161-196				202-207/216-222	137	239
	Mimulus_guttatus	Migut.F00088.1.p	462	HSF_DNA-bind	24	113	A1	1.2e-213	yes	yes	yes	21-114	138-202	220-230	406-415	447-454		138	237
	Mimulus_guttatus	Migut.L01507.1.p	360	HSF_DNA-bind	61	150	-	-	yes	no	no	58-150		48-54	314-323	339-347		148	218
	Mimulus_guttatus	Migut.E00498.1.p	343	HSF_DNA-bind	14	103	A8	1.9e-124	yes	yes	yes	12-119	152-209	306-314	292-301			117	198
	Mimulus_guttatus	Migut.M00209.1.p	352	HSF_DNA-bind	12	101	A4	1.1e-121	yes	yes	yes	9-102	125-182		221-230/306-315			112	200
	Mimulus_guttatus	Migut.H01491.1.p	205	HSF_DNA-bind	24	128	B5	1.4e-102	yes	yes	yes	21-129	162-202					144	201
	Mimulus_guttatus	Migut.E01778.1.p	351	HSF_DNA-bind	46	135	A2	6.1e-154	yes	yes	yes	43-136	154-218	230-243	297-304/334-342	343-349		152	246
	Mimulus_guttatus	Migut.N00424.1.p	427	HSF_DNA-bind	18	107	-	-	yes	no	yes	15-108	154-184	195-210	374-383	414-421		114	212
	Mimulus_guttatus	Migut.H02116.1.p	388	HSF_DNA-bind	14	103	-	-	yes	no	no	11-104		194-197	243-252/360-369			110	197
	Mimulus_guttatus	Migut.L01754.1.p	377	HSF_DNA-bind	68	157	A3	8.4e-127	yes	yes	yes	65-158	186-232	258-267				144	238
	Mimulus_guttatus	Migut.D00358.1.p	343	HSF_DNA-bind	45	134	A6	2.9e-150	yes	yes	yes	42-135	155-219	234-253	305-314	323-333		155	242
	Mimulus_guttatus	Migut.E00326.1.p	344	HSF_DNA-bind	18	107	C1	2.6e-143	yes	yes	yes	15-109	135-178	209-214				127	192
	Mimulus_guttatus	Migut.H01517.1.p	293	HSF_DNA-bind	32	122	-	-	yes	no	no	29-123		188-201	249-256			133	213
	Mimulus_guttatus	Migut.M01003.1.p	327	HSF_DNA-bind	48	137	-	-	yes	no	no	45-137				288-296		125	210
	Mimulus_guttatus	Migut.C00567.1.p	241	HSF_DNA-bind	25	60	B4	1e-72	yes	yes	yes	22-47	92-128	202-205		224-231	192-198	89	121
	Solanum_lycopersicum	Solyc08g005170.2.1	528	HSF_DNA-bind	40	129	A1	3e-228	yes	yes	yes	37-130	163-227	245-255	468-477	511-518		163	263
	Solanum_lycopersicum	Solyc12g098520.1.1	479	HSF_DNA-bind	19	108	A5	0e	yes	yes	yes	?16-109	129-186	197-212	?426-435	466-473		120	215
	Solanum_lycopersicum	Solyc11g064990.1.1	252	HSF_DNA-bind	24	113	B4	7.1e-110	yes	yes	yes	21-114	154-190	237-240			227-233	146	190
	Solanum_lycopersicum	Solyc03g026020.2.1	339	HSF_DNA-bind	26	115	B2	4.3e-155	yes	yes	yes	23-116	184-220	281-285			272-278	166	220
	Solanum_lycopersicum	Solyc09g065660.2.1	373	HSF_DNA-bind	43	132	A6	1.2e-157	yes	yes	yes	40-133	152-216	231-245	321-330			157	248
	Solanum_lycopersicum	Solyc04g078770.2.1	361	HSF_DNA-bind	25	114	B4	3.2e-171	yes	yes	yes	22-115	190-226	318-321		343-355	308-314	173	221
	Solanum_lycopersicum	Solyc08g076590.2.1	491	HSF_DNA-bind	26	115	A1	1.5e-187	yes	yes	yes	23-116	138-202	220-230	428-437	476-483		136	230
	Solanum_lycopersicum	Solyc02g090820.2.1	302	HSF_DNA-bind	10	99	B1	5.4e-146	yes	yes	yes	7-100	154-191				248-254	147	228
	Solanum_lycopersicum	Solyc06g072750.2.1	483	HSF_DNA-bind	22	111	A1	8.1e-253	yes	yes	yes	19-112	135-199	217-227	437-446			135	219
	Solanum_lycopersicum	Solyc08g080540.2.1	326	HSF_DNA-bind	25	114	B2	1.7e-205	yes	yes	yes	22-115	184-220	277-281			268-274	179	226
	Solanum_lycopersicum	Solyc04g016000.2.1	238	HSF_DNA-bind	29	118	B3	5.2e-153	yes	yes	yes	26-119	154-189	17-221			203-209	107	120
	Solanum_lycopersicum	Solyc07g055710.2.1	389	HSF_DNA-bind	16	105	A4	1.3e-196	yes	yes	yes	13-106	132-189	204-207	235-244/324-333	374-381		119	195
	Solanum_lycopersicum	Solyc02g072000.2.1	409	HSF_DNA-bind	14	104	A4	3.1e-191	yes	yes	yes	11-104	130-187	205-208	257-266/344-353	395-402		120	200
	Solanum_lycopersicum	Solyc10g079380.1.1	256	HSF_DNA-bind	24	113	B3	1.4e-159	yes	yes	yes	21-114	153-188	224-225			197-202/207-213	108	241
	Solanum_lycopersicum	Solyc03g097120.2.1	492	HSF_DNA-bind	18	107	A1	3.4e-259	yes	yes	yes	15-108	131-195	213-223	430-439	478-485		131	221
	Solanum_lycopersicum	Solyc08g062960.2.1	352	HSF_DNA-bind	32	121	A2	2.3e-192	yes	yes	yes	29-122	137-201	217-230	262-270/294-301/335-343	344-350		138	232
	Solanum_lycopersicum	Solyc06g053960.2.1	143	HSF_DNA-bind	33	122	-	-	yes	no	no	30-123
	Solanum_lycopersicum	Solyc03g006000.2.1	402	HSF_DNA-bind	14	103	A4	2.2e-254	yes	yes	yes	11-104	130-187	205-208	257-266/342-351	390-397		112	207
	Solanum_lycopersicum	Solyc02g078340.2.1	206	HSF_DNA-bind	26	121	B5	1.2e-157	yes	yes	yes	23-122	158-198	200-203				27	49
	Solanum_lycopersicum	Solyc09g082670.2.1	357	HSF_DNA-bind	38	127	A6	4.7e-149	yes	yes	yes	35-128	146-210	225-239	314-323	341-351		145	248
	Solanum_lycopersicum	Solyc07g040680.2.1	357	HSF_DNA-bind	60	149	A9	1.9e-217	yes	yes	yes	57-149	176-226	48-243	312-321	338-346		172	227
	Solanum_lycopersicum	Solyc09g059520.2.1	390	HSF_DNA-bind	14	103	A8	8.7e-208	yes	yes	yes	12-119	147-204	319-327	305-314			88	191
	Solanum_lycopersicum	Solyc12g007070.1.1	370	HSF_DNA-bind	10	99	C1	1.8e-174	yes	yes	yes	7-101	118-161	186-191				92	191
	Solanum_lycopersicum	Solyc09g009100.2.1	510	HSF_DNA-bind	95	187	A3	0e	yes	yes	yes	92-188	213-259	285-294	429-435/448-453/467-476/484-490			198	278
	Solanum_lycopersicum	Solyc02g079180.1.1	415	HSF_DNA-bind	93	182	A9	2.9e-31	yes	yes	yes	90-182	206-256	272-273				9	35
	Solanum_lycopersicum	Solyc02g072060.1.1	340	HSF_DNA-bind	40	128	A9	1.1e-54	yes	yes	yes	37-129	154-204	220-221	270-279	312-320		121	186
	Solanum_tuberosum	PGSC0003DMP400014004	373	HSF_DNA-bind	25	114	B4	8.4e-173	yes	yes	yes	22-115	196-232	330-333		354-367	320-326	177	227
	Solanum_tuberosum	PGSC0003DMP400033605	365	HSF_DNA-bind	40	129	A6	4.6e-156	yes	yes	yes	37-130	144-208	223-237	313-322			148	242
	Solanum_tuberosum	PGSC0003DMP400005485	318	HSF_DNA-bind	25	114	B2	4.6e-186	yes	yes	yes	22-115	186-222	267-271			258-264	176	231
	Solanum_tuberosum	PGSC0003DMP400056532	246	HSF_DNA-bind	13	102	B4	3.3e-117	yes	yes	yes	10-103	142-178	231-234			221-227	133	176
	Solanum_tuberosum	PGSC0003DMP400007176	303	HSF_DNA-bind	10	99	B1	1.3e-144	yes	yes	yes	7-100	154-191				248-254	147	228
	Solanum_tuberosum	PGSC0003DMP400008251	479	HSF_DNA-bind	19	108	A5	0e	yes	yes	yes	16-109	129-186	197-212	426-435	466-473		120	215
	Solanum_tuberosum	PGSC0003DMP400026069	499	HSF_DNA-bind	31	120	A1	3.6e-187	yes	yes	yes	28-121	147-211	229-239	437-446	484-491		127	140
	Solanum_tuberosum	PGSC0003DMP400004805	481	HSF_DNA-bind	68	157	A3	0e	yes	yes	yes	65-158	183-229	255-264	400-406/419-424/438-447/455-461			165	248
	Solanum_tuberosum	PGSC0003DMP400047457	248	HSF_DNA-bind	29	118	B3	6.2e-175	yes	yes	yes	26-119	165-200	17-231			213-219	108	118
	Solanum_tuberosum	PGSC0003DMP400049433	409	HSF_DNA-bind	14	104	A4	4.5e-195	yes	yes	yes	11-104	130-187	205-208	257-266/	395-402		121	201
	Solanum_tuberosum	PGSC0003DMP400030290	413	HSF_DNA-bind	16	105	A4	3.1e-186	yes	yes	yes	22-115	186-222	267-271			258-264	112	218
	Solanum_tuberosum	PGSC0003DMP400046950	482	HSF_DNA-bind	14	103	A1	8.1e-250	yes	yes	yes	11-104	127-191	209-219	429-438			127	211
	Solanum_tuberosum	PGSC0003DMP400014459	354	HSF_DNA-bind	32	121	A2	2.2e-204	yes	yes	yes	29-122	137-201	217-230	269-277/297-304/337-345	346-352		138	241
	Solanum_tuberosum	PGSC0003DMP400048367	404	HSF_DNA-bind	14	103	A4	6.1e-247	yes	yes	yes	11-104	130-187	205-208	257-266/342-351	390-397		109	207
	Solanum_tuberosum	PGSC0003DMP400005713	493	HSF_DNA-bind	18	107	A1	1.1e-267	yes	yes	yes	15-108	131-195	213-223	431-440	479-486		131	216
	Solanum_tuberosum	PGSC0003DMP400014364	245	HSF_DNA-bind	24	113	B3	5.2e-160	yes	yes	yes	21-114	154-189	225-226			198-203/208-214	123	242
	Solanum_tuberosum	PGSC0003DMP400051767	202	HSF_DNA-bind	25	120	B5	1.5e-140	yes	yes	yes	22-121	154-194	196-199				25	48
	Solanum_tuberosum	PGSC0003DMP400011443	363	HSF_DNA-bind	38	127	A6	2.1e-147	yes	yes	yes	35-128	146-210	225-239	320-329	347-357		145	248
	Solanum_tuberosum	PGSC0003DMP400065338	247	HSF_DNA-bind	31	120	A9	1e-50	yes	yes	yes	28-120	139-189	205-206				122	122
	Solanum_tuberosum	PGSC0003DMP400025228	261	HSF_DNA-bind	26	109	-	-	yes	no	no	23-116		203-207			194-200	101	146
	Solanum_tuberosum	PGSC0003DMP400055694	362	HSF_DNA-bind	67	156	A9	1.5e-208	yes	yes	yes	64-156	179-229	55-246	317-326	343-351		5	16
	Solanum_tuberosum	PGSC0003DMP400028424	345	HSF_DNA-bind	33	122	A6	8.4e-170	yes	yes	yes	30-123	154-219	234-248	307-316			157	257
	Solanum_tuberosum	PGSC0003DMP400030540	395	HSF_DNA-bind	14	103	A8	3e-181	yes	yes	yes	12-119	147-204	319-327	305-314			88	191
	Solanum_tuberosum	PGSC0003DMP400000756	369	HSF_DNA-bind	10	99	C1	3.7e-177	yes	yes	yes	7-101	118-161	186-191				92	192
	Solanum_tuberosum	PGSC0003DMP400004801	498	HSF_DNA-bind	68	174	A3	0e	yes	yes	yes	65-175	200-246	272-281	417-423/436-441/455-464/472-478			182	265
	Solanum_tuberosum	PGSC0003DMP400063465	412	HSF_DNA-bind	90	179	A9	1.5e-29	yes	yes	yes	87-179	203-253	269-270				7	59
	Solanum_tuberosum	PGSC0003DMP400049438	341	HSF_DNA-bind	41	129	A9	1.4e-56	yes	yes	yes	38-130	155-205	221-222	271-280	313-321		124	187
	Solanum_tuberosum	PGSC0003DMP400033615	75	HSF_DNA-bind	12	70	-	-	yes	no	no	9-68
	Solanum_tuberosum	PGSC0003DMP400033616	107	HSF_DNA-bind	39	99	-	-	yes	no	no	36-95
	Solanum_tuberosum	PGSC0003DMP400028423	118	HSF_DNA-bind	33	91	-	-	yes	no	no	30-89
	Arabidopsis_lyrata	858789	296	HSF_DNA-bind	152	237	-	-	yes	no	no	15-123						116	140
	Arabidopsis_lyrata	493100	463	HSF_DNA-bind	38	127	A1	2.8e-175	yes	yes	yes	35-128	158-222	240-250		450-457		143	262
	Arabidopsis_lyrata	919451	300	HSF_DNA-bind	24	113	B2	2.7e-159	yes	yes	yes	21-114	176-212	260-264			251-257	170	215
	Arabidopsis_lyrata	490909	283	HSF_DNA-bind	15	104	B1	1.8e-170	yes	yes	yes	12-105	154-191				235-241	142	201
	Arabidopsis_lyrata	911518	378	HSF_DNA-bind	60	149	B2	1.6e-190	yes	yes	yes	57-150	228-264	323-327			314-320	223	264
	Arabidopsis_lyrata	473862	348	HSF_DNA-bind	35	124	B4	6.9e-190	yes	yes	yes	32-125	197-233	315-318		330-342	305-311	184	229
	Arabidopsis_lyrata	481471	346	HSF_DNA-bind	45	134	A2	8.4e-196	yes	yes	yes	42-135	152-216	232-245	274-282/324-326	337-341		1	12
	Arabidopsis_lyrata	479794	415	HSF_DNA-bind	64	153	A6	7.7e-211	yes	yes	yes	61-154	178-242	257-271	375-384	397-407		179	285
	Arabidopsis_lyrata	473420	483	HSF_DNA-bind	40	129	A1	1.9e-194	yes	yes	yes	37-130	156-220	239-249		463-470		155	261
	Arabidopsis_lyrata	492972	400	HSF_DNA-bind	16	105	A4	2.9e-193	yes	yes	yes	13-106	131-188	207-210	256-265/340-349	386-393		115	194
	Arabidopsis_lyrata	488541	476	HSF_DNA-bind	28	117	A1	1.4e-217	yes	yes	yes	25-118	140-204	222-232	412-421	461-468		109	115
	Arabidopsis_lyrata	321853	248	HSF_DNA-bind	43	132	B3	3e-123	yes	yes	yes	40-133	184-219				240-245	167	239
	Arabidopsis_lyrata	914977	315	HSF_DNA-bind	171	258	-	-	yes	no	no	8-69						91	151
	Arabidopsis_lyrata	477545	461	HSF_DNA-bind	16	105	A1	2.5e-232	yes	yes	yes	13-106	127-191	209-219	394-403	446-453		127	263
	Arabidopsis_lyrata	494414	346	HSF_DNA-bind	14	103	A4	1.4e-202	yes	yes	yes	11-104	128-185		226-235/289-298			96	239
	Arabidopsis_lyrata	356702	289	HSF_DNA-bind	20	109	A6	4.1e-129	yes	yes	yes	17-110	128-184					95	225
	Arabidopsis_lyrata	479964	328	HSF_DNA-bind	21	110	C1	1e-182	yes	yes	yes	18-112	126-169	191-196				119	221
	Arabidopsis_lyrata	485548	278	HSF_DNA-bind	33	122	A6/A7	5.2e-149	yes	yes	yes	30-123	140-190		259-267	225-235		132	267
	Arabidopsis_lyrata	908246	414	HSF_DNA-bind	53	142	A3	8.1e-196	yes	yes	yes	50-143	172-218	247-256				155	243
	Arabidopsis_lyrata	493513	467	HSF_DNA-bind	24	113	A5	0e	yes	yes	yes	21-114	134-191	202-217	414-423	454-461		123	206
	Arabidopsis_lyrata	876867	375	HSF_DNA-bind	19	109	A8	3.3e-167	yes	yes	yes	17-125	153-210	299-307	285-294			94	210
	Arabidopsis_lyrata	495484	326	HSF_DNA-bind	62	151	A9	4.2e-138	yes	yes	yes	59-151	169-219	235-236				30	45
	Arabidopsis_lyrata	349389	298	HSF_DNA-bind	29	134	A6/A7	1.9e-87	yes	yes	yes	26-119	160-210		272-280	246-256		148	272
	Arabidopsis_lyrata	859202	179	HSF_DNA-bind	147	177	-	-	yes	no	no	12-103						89	135
	Arabidopsis_lyrata	914975	170	HSF_DNA-bind	21	107	-	-	yes	no	no	16-109						103	166
	Arabidopsis_lyrata	908564	137	HSF_DNA-bind	5	93	-	-	yes	no	no	2-97
	Arabidopsis_lyrata	915131	121	HSF_DNA-bind	15	103	-	-	yes	no	no	12-120
	Arabidopsis_lyrata	353697	199	HSF_DNA-bind	2	87	-	-	yes	no	no	23-193						160	189
	Arabidopsis_lyrata	918562	98	HSF_DNA-bind	14	81	-	-	yes	no	no	11-72
	Arabidopsis_lyrata	914704	127	HSF_DNA-bind	12	101	-	-	yes	no	no	9-104						93	125
	Arabidopsis_lyrata	875173	128	HSF_DNA-bind	17	107	-	-	yes	no	no	14-110						108	122
	Arabidopsis_lyrata	914699	131	HSF_DNA-bind	12	101	-	-	yes	no	no	9-104						95	129
	Arabidopsis_lyrata	909257	126	HSF_DNA-bind	2	79	-	-	yes	no	no	47-80						92	119
	Arabidopsis_lyrata	894128	118	HSF_DNA-bind	27	112	-	-	yes	no	no	21-59
	Arabidopsis_lyrata	913148	82	HSF_DNA-bind	13	73	-	-	yes	no	no	10-48
	Arabidopsis_thaliana	AT4G18870.1	292	HSF_DNA-bind	147	233	-	-	yes	no	no	10-103						114	133
	Arabidopsis_thaliana	AT4G17750.1	496	HSF_DNA-bind	53	142	A1	6.8e-178	yes	yes	yes	50-143	174-238	256-266		482-489		172	276
	Arabidopsis_thaliana	AT4G36990.1	285	HSF_DNA-bind	15	104	B1	2.3e-179	yes	yes	yes	12-105	155-192				237-243	143	193
	Arabidopsis_thaliana	AT4G11660.1	378	HSF_DNA-bind	60	149	B2	2.5e-201	yes	yes	yes	57-150	229-265	323-327			314-320	223	265
	Arabidopsis_thaliana	AT5G62020.1	300	HSF_DNA-bind	24	113	B2	4.9e-173	yes	yes	yes	21-114	175-211	261-265			252-258	169	213
	Arabidopsis_thaliana	AT1G46264.1	349	HSF_DNA-bind	35	124	B4	1.3e-194	yes	yes	yes	32-125	196-232	316-319		331-343	306-312	184	228
	Arabidopsis_thaliana	AT2G26150.1	346	HSF_DNA-bind	45	134	A2	6.6e-202	yes	yes	yes	42-135	152-216	232-245	274-282/ 324-326	337-341		1	12
	Arabidopsis_thaliana	AT3G22830.1	407	HSF_DNA-bind	62	151	A6	1.5e-230	yes	yes	yes	59-152	176-240	255-269	367-376	389-399		177	287
	Arabidopsis_thaliana	AT4G18880.1	402	HSF_DNA-bind	16	105	A4	2.2e-182	yes	yes	yes	13-106	131-188	207-210	256-265/ 341-350	388-395		117	194
	Arabidopsis_thaliana	AT1G32330.1	486	HSF_DNA-bind	38	127	A1	2.6e-188	yes	yes	yes	35-128	154-218	239-249		466-473		153	254
	Arabidopsis_thaliana	AT5G16820.1	482	HSF_DNA-bind	28	117	A1	5.7e-218	yes	yes	yes	25-118	140-204	223-233	418-427	467-474		140	224
	Arabidopsis_thaliana	AT5G43840.1	283	HSF_DNA-bind	20	109	A6	3.6e-144	yes	yes	yes	17-110	121-177					91	210
	Arabidopsis_thaliana	AT3G02990.1	469	HSF_DNA-bind	24	113	A1	5.4e-237	yes	yes	yes	21-114	135-199	217-227	402-411	454-461		135	273
	Arabidopsis_thaliana	AT3G63350.1	283	HSF_DNA-bind	29	118	A6/A7	5.3e-143	yes	yes	yes	26-119	146-196		258-266	232-242		130	255
	Arabidopsis_thaliana	AT5G54070.1	332	HSF_DNA-bind	72	161	-	-	yes	no	no	69-161						156	292
	Arabidopsis_thaliana	AT5G45710.1	346	HSF_DNA-bind	14	103	A4	4.1e-206	yes	yes	yes	11-104	128-185		226-235/289-298			96	209
	Arabidopsis_thaliana	AT3G24520.1	331	HSF_DNA-bind	18	107	C1	9.3e-198	yes	yes	yes	15-109	123-166	190-195				116	221
	Arabidopsis_thaliana	AT2G41690.1	245	HSF_DNA-bind	41	130	B3	3.4e-155	yes	yes	yes	38-131	182-217				237-242	165	242
	Arabidopsis_thaliana	AT3G51910.1	273	HSF_DNA-bind	30	119	A6/A7	2.4e-151	yes	yes	yes	27-120	136-186		255-263			128	265
	Arabidopsis_thaliana	AT4G13980.1	467	HSF_DNA-bind	24	113	A5	0e	yes	yes	yes	21-114	134-191	202-217	414-423	454-461		123	207
	Arabidopsis_thaliana	AT5G03720.1	413	HSF_DNA-bind	56	145	A3	4.4e-197	yes	yes	yes	53-146	175-221	250-259				158	252
	Arabidopsis_thaliana	AT1G67970.1	375	HSF_DNA-bind	20	110	A8	3.2e-163	yes	yes	yes	18-126	150-207	298-306	284-293			96	207
	Arabidopsis_thaliana	AT4G19630.1	132	HSF_DNA-bind	12	101	-	-	yes	no	no	9-104
	Arabidopsis_thaliana	AT1G77570.1	148	HSF_DNA-bind	27	116	-	-	yes	no	no	24-117		123-133
	Boechera_stricta	Bostr.26833s0037.1.p	278	HSF_DNA-bind	24	113	B2	1.2e-142	yes	yes	yes	21-114	176-212	236-240			227-233	169	205
	Boechera_stricta	Bostr.30275s0239.1.p	462	HSF_DNA-bind	38	127	A1	5.9e-177	yes	yes	yes	35-128	156-220	236-246		447-454		150	268
	Boechera_stricta	Bostr.12302s0136.1.p	343	HSF_DNA-bind	35	124	B4	1.7e-186	yes	yes	yes	32-125	196-232	310-313		325-337	300-306	185	228
	Boechera_stricta	Bostr.26326s0040.1.p	350	HSF_DNA-bind	45	134	A2	3.3e-200	yes	yes	yes	42-135	156-220	236-249	278-286/328-330	341-345		2	12
	Boechera_stricta	Bostr.25463s0156.1.p	367	HSF_DNA-bind	52	141	B2	1.9e-192	yes	yes	yes	49-142	216-252	312-316			303-309	210	257
	Boechera_stricta	Bostr.7867s1570.1.p	283	HSF_DNA-bind	15	104	B1	1.9e-168	yes	yes	yes	12-105	153-190				235-241	141	200
	Boechera_stricta	Bostr.3148s0085.1.p	278	HSF_DNA-bind	20	109	A6	5.2e-118	yes	yes	yes	17-110	128-184					94	226
	Boechera_stricta	Bostr.11568s0011.1.p	236	HSF_DNA-bind	32	121	B3	1.8e-120	yes	yes	yes	29-122	172-207				228-233	153	225
	Boechera_stricta	Bostr.30275s0365.1.p	401	HSF_DNA-bind	16	105	A4	1.9e-192	yes	yes	yes	13-106	131-188	207-210	256-265/344-353	391-398		115	194
	Boechera_stricta	Bostr.19424s0375.1.p	414	HSF_DNA-bind	65	154	A6	4.3e-212	yes	yes	yes	62-155	179-243	258-272	371-380	393-403		183	372
	Boechera_stricta	Bostr.3359s0126.1.p	493	HSF_DNA-bind	45	134	A1	1e-191	yes	yes	yes	42-135	161-225	246-256		473-480		160	260
	Boechera_stricta	Bostr.8819s0096.1.p	344	HSF_DNA-bind	14	103	A4	3.7e-196	yes	yes	yes	11-104	128-185		226-235/289-298			97	239
	Boechera_stricta	Bostr.19046s0011.1.p	470	HSF_DNA-bind	25	114	A1	5.2e-236	yes	yes	yes	22-115	136-200	218-228	403-412	455-462		136	229
	Boechera_stricta	Bostr.2618s0023.1.p	454	HSF_DNA-bind	28	117	A1	1.1e-212	yes	yes	yes	25-118	140-204	222-232	387-396	439-446		140	224
	Boechera_stricta	Bostr.9017s0008.1.p	474	HSF_DNA-bind	24	113	A5	0e	yes	yes	yes	21-114	134-191	202-217	421-430	461-468		124	207
	Boechera_stricta	Bostr.19424s0169.1.p	329	HSF_DNA-bind	19	108	C1	1.4e-181	yes	yes	yes	16-110	124-167	189-194				116	219
	Boechera_stricta	Bostr.2128s0078.1.p	415	HSF_DNA-bind	58	147	A3	1.4e-173	yes	yes	yes	55-148	177-223	251-260				157	255
	Boechera_stricta	Bostr.6864s0056.1.p	269	HSF_DNA-bind	26	115	A6/A7	1.3e-141	yes	yes	yes	23-116	132-182		250-258	216-226		107	252
	Boechera_stricta	Bostr.26959s0105.1.p	374	HSF_DNA-bind	19	109	A8	1.3e-165	yes	yes	yes	17-125	153-210	299-307	285-294			95	210
	Boechera_stricta	Bostr.13158s0337.1.p	193	HSF_DNA-bind	40	129	-	-	yes	no	no	39-130			176-184	150-160		165	177
	Boechera_stricta	Bostr.30275s0196.1.p	332	HSF_DNA-bind	175	263	-	-	yes	no	no	8-69						81	150
	Boechera_stricta	Bostr.3148s0205.1.p	302	HSF_DNA-bind	14	104	B4	8.2e-113	yes	yes	yes	11-105	147-183	252-255		272-279	242-248	140	179
	Boechera_stricta	Bostr.26833s0872.1.p	368	HSF_DNA-bind	71	165	A9	5.2e-91	yes	yes	yes	68-106	181-231	247-248				159	294
	Boechera_stricta	Bostr.26959s0010.1.p	132	HSF_DNA-bind	12	104	-	-	yes	no	no	10-120						111	127
	Boechera_stricta	Bostr.0556s0470.1.p	140	HSF_DNA-bind	17	97	-	-	yes	no	no	12-105
	Boechera_stricta	Bostr.3359s0057.1.p	128	HSF_DNA-bind	15	96	-	-	yes	no	no	12-105
	Boechera_stricta	Bostr.20129s0193.1.p	135	HSF_DNA-bind	12	100	-	-	yes	no	no	10-119
	Boechera_stricta	Bostr.30275s0364.1.p	237	HSF_DNA-bind	91	164	-	-	yes	no	no	5-112						52	88
	Boechera_stricta	Bostr.30275s0431.1.p	160	HSF_DNA-bind	13	100	-	-	yes	no	no	10-103						128	158
	Boechera_stricta	Bostr.27895s0020.1.p	130	HSF_DNA-bind	13	102	-	-	yes	no	no	10-71						107	122
	Boechera_stricta	Bostr.26833s0242.1.p	123	HSF_DNA-bind	10	83	-	-	yes	no	no	15-52
	Brassica_rapa	Brara.A00901.1.p	436	HSF_DNA-bind	39	128	A1	1e-189	yes	yes	yes	36-129	157-221	240-250		421-428		157	255
	Brassica_rapa	Brara.K01279.1.p	272	HSF_DNA-bind	12	101	B1	3e-139	yes	yes	yes	9-102	137-174				224-230	84	114
	Brassica_rapa	Brara.H00433.1.p	336	HSF_DNA-bind	35	124	B4	3e-175	yes	yes	yes	32-125	195-231	303-306		318-330	293-299	182	228
	Brassica_rapa	Brara.B03785.1.p	253	HSF_DNA-bind	16	105	B2	2.7e-146	yes	yes	yes	13-106	153-189	218-222			209-215	146	191
	Brassica_rapa	Brara.F02032.1.p	303	HSF_DNA-bind	24	113	B2	2.6e-161	yes	yes	yes	21-114	174-210	262-266			253-259	106	111
	Brassica_rapa	Brara.J00564.1.p	330	HSF_DNA-bind	32	121	B4	4.2e-174	yes	yes	yes	29-122	191-227	297-300		312-324	287-293	180	224
	Brassica_rapa	Brara.I02617.1.p	488	HSF_DNA-bind	36	125	A1	1.3e-181	yes	yes	yes	33-126	150-214	235-245		468-475		150	249
	Brassica_rapa	Brara.K00418.1.p	391	HSF_DNA-bind	17	106	A4	1.1e-180	yes	yes	yes	14-107	130-187		255-264/340-349	381-388		121	284
	Brassica_rapa	Brara.C02130.1.p	240	HSF_DNA-bind	41	130	B3	8.2e-119	yes	yes	yes	38-131	176-211				232-237	171	229
	Brassica_rapa	Brara.I02304.1.p	358	HSF_DNA-bind	49	138	B2	1.6e-195	yes	yes	yes	46-139	216-252	306-310			297-303	210	254
	Brassica_rapa	Brara.C03015.1.p	456	HSF_DNA-bind	27	116	A1	1.8e-203	yes	yes	yes	24-117	138-202	220-230	389-398	441-448		138	227
	Brassica_rapa	Brara.C02682.1.p	319	HSF_DNA-bind	38	127	B2	5e-171	yes	yes	yes	35-128	187-223	268-272			259-265	181	248
	Brassica_rapa	Brara.A00997.1.p	389	HSF_DNA-bind	16	105	A4	1.2e-174	yes	yes	yes	13-106	131-188	207-210	247-256/334-343	379-386		112	269
	Brassica_rapa	Brara.I01903.1.p	341	HSF_DNA-bind	14	103	A4	1.6e-184	yes	yes	yes	11-104	128-185		228-237/289-298			96	243
	Brassica_rapa	Brara.E01977.1.p	406	HSF_DNA-bind	61	150	A6	1.3e-194	yes	yes	yes	58-151	175-239	254-268	368-377	390-400		175	285
	Brassica_rapa	Brara.C02475.1.p	351	HSF_DNA-bind	46	135	A2	6.3e-192	yes	yes	yes	43-136	161-225	241-254	284-292/329-331	342-346		3	13
	Brassica_rapa	Brara.C03890.1.p	392	HSF_DNA-bind	61	150	A6	1.4e-175	yes	yes	yes	58-151	175-239	254-268	354-363	376-386		175	284
	Brassica_rapa	Brara.I04380.1.p	269	HSF_DNA-bind	27	116	A6/A7	9.6e-131	yes	yes	yes	24-117	136-186		245-253	219-229		128	246
	Brassica_rapa	Brara.C03963.1.p	305	HSF_DNA-bind	19	108	C1	1.3e-164	yes	yes	yes	16-110	122-165					97	201
	Brassica_rapa	Brara.A03853.1.p	455	HSF_DNA-bind	25	114	A1	3.2e-203	yes	yes	yes	22-115	136-200	219-229	388-397	440-447		136	216
	Brassica_rapa	Brara.B02421.1.p	282	HSF_DNA-bind	20	109	A6	1.3e-109	yes	yes	yes	17-110	124-180					84	213
	Brassica_rapa	Brara.H00975.1.p	369	HSF_DNA-bind	13	103	A4	1.6e-133	yes	yes	yes	11-104	127-184	203-206	234-243/318-327	359-366		118	206
	Brassica_rapa	Brara.B00680.1.p	443	HSF_DNA-bind	27	116	A1	8.8e-205	yes	yes	yes	24-117	135-199	217-227	381-390	428-435		118	228
	Brassica_rapa	Brara.E03542.1.p	445	HSF_DNA-bind	18	107	A1	1.7e-202	yes	yes	yes	15-108	129-193	212-222	391-400			129	213
	Brassica_rapa	Brara.J01849.1.p	453	HSF_DNA-bind	28	117	A1	8.7e-157	yes	yes	yes	25-118	137-194	214-224	386-395	431-438		105	127
	Brassica_rapa	Brara.G00630.1.p	315	HSF_DNA-bind	17	106	C1	2.4e-171	yes	yes	yes	14-108	123-166	187-192				96	203
	Brassica_rapa	Brara.J02803.1.p	388	HSF_DNA-bind	38	127	A3	2.6e-177	yes	yes	yes	35-128	159-205	232-241				134	219
	Brassica_rapa	Brara.D00679.1.p	478	HSF_DNA-bind	27	116	A5	9.6e-260	yes	yes	yes	24-117	137-194	205-220	425-434	465-472		124	222
	Brassica_rapa	Brara.C04390.1.p	270	HSF_DNA-bind	30	119	A6/A7	4.5e-123	yes	yes	yes	27-120	135-185		250-258	218-228		123	260
	Brassica_rapa	Brara.G02753.1.p	385	HSF_DNA-bind	21	111	A8	2.5e-187	yes	yes	yes	19-127	156-213	302-310	288-297			107	234
	Brassica_rapa	Brara.D00624.1.p	266	HSF_DNA-bind	27	116	A6/A7	2.4e-132	yes	yes	yes	24-117	132-182		247-255	215-225		124	258
	Brassica_rapa	Brara.A02699.1.p	386	HSF_DNA-bind	56	134	A6	4.6e-160	yes	yes	yes	42-135	159-223	238-252	347-356	370-380		159	266
	Brassica_rapa	Brara.B03848.1.p	147	HSF_DNA-bind	13	103	-	-	yes	no	no	10-103
	Brassica_rapa	Brara.A01052.1.p	166	HSF_DNA-bind	4	93	-	-	yes	no	no	3-94						84	128
	Brassica_rapa	Brara.A01056.1.p	161	HSF_DNA-bind	4	94	-	-	yes	no	no	3-94						85	159
	Brassica_rapa	Brara.C01714.1.p	147	HSF_DNA-bind	15	110	-	-	yes	no	no	12-73		124-133				103	145
	Brassica_rapa	Brara.A02126.1.p	169	HSF_DNA-bind	9	99	-	-	yes	no	no	6-98						90	125
	Brassica_rapa	Brara.B03846.1.p	200	HSF_DNA-bind	44	155	-	-	yes	no	no	42-66						176	194
	Brassica_rapa	Brara.D01002.1.p	145	HSF_DNA-bind	13	97	-	-	yes	no	no	11-121						95	139
	Brassica_rapa	Brara.D01000.1.p	142	HSF_DNA-bind	13	95	-	-	yes	no	no	9-33						89	135
	Brassica_rapa	Brara.D01032.1.p	141	HSF_DNA-bind	10	94	-	-	yes	no	no	8-32						82	135
	Brassica_rapa	Brara.D01030.1.p	141	HSF_DNA-bind	10	94	-	-	yes	no	no	8-32						88	134
	Brassica_rapa	Brara.D01228.1.p	123	HSF_DNA-bind	15	87	-	-	yes	no	no	21-58		97-110
	Brassica_rapa	Brara.A01055.1.p	153	HSF_DNA-bind	9	69	-	-	yes	no	no	6-67						82	113
	Brassica_rapa	Brara.D01027.1.p	132	HSF_DNA-bind	5	91	-	-	yes	no	no	4-24						91	112
	Capsella_rubella	Carubv10007111m	295	HSF_DNA-bind	149	238	-	-	yes	no	no	12-120				133-143		110	127
	Capsella_rubella	Carubv10026734m	340	HSF_DNA-bind	57	146	B2	2.8e-153	yes	yes	yes	54-147	213-249	297-301			288-294	207	251
	Capsella_rubella	Carubv10005408m	289	HSF_DNA-bind	15	104	B1	3.9e-166	yes	yes	yes	12-105	156-193				241-247	98	102
	Capsella_rubella	Carubv10009522m	364	HSF_DNA-bind	49	138	B4	5.3e-186	yes	yes	yes	46-139	215-251	334-337		349-356	324-330	197	248
	Capsella_rubella	Carubv10001204m	373	HSF_DNA-bind	60	149	B2	1.7e-198	yes	yes	yes	57-150	227-263	318-322			309-315	221	263
	Capsella_rubella	Carubv10025710m	348	HSF_DNA-bind	45	134	A2	1.2e-198	yes	yes	yes	42-135	156-220	236-249	278-286/326-328	339-343		2	11
	Capsella_rubella	Carubv10004953m	406	HSF_DNA-bind	16	105	A4	5.6e-192	yes	yes	yes	13-106	131-188	207-210	256-265/345-354	392-399		115	194
	Capsella_rubella	Carubv10004840m	436	HSF_DNA-bind	37	126	A1	6.1e-136	yes	yes	yes	34-127	146-210	228-238				123	246
	Capsella_rubella	Carubv10019491m	282	HSF_DNA-bind	28	117	A6/A7	2.6e-127	yes	yes	yes	25-118	143-193		255-263	229-239		132	255
	Capsella_rubella	Carubv10008952m	496	HSF_DNA-bind	50	139	A1	6.8e-191	yes	yes	yes	47-140	166-230	251-261		476-483		165	264
	Capsella_rubella	Carubv10013808m	418	HSF_DNA-bind	65	154	A6	6.1e-211	yes	yes	yes	62-155	179-243	258-272	374-383	396-406		149	176
	Capsella_rubella	Carubv10013628m	469	HSF_DNA-bind	24	113	A1	7.9e-233	yes	yes	yes	21-114	135-199	217-227	402-411	454-461		135	272
	Capsella_rubella	Carubv10028300m	273	HSF_DNA-bind	20	109	A6	2.7e-113	yes	yes	yes	17-110	125-181					95	212
	Capsella_rubella	Carubv10026722m	344	HSF_DNA-bind	14	103	A4	4.7e-194	yes	yes	yes	11-104	128-185		226-235			96	203
	Capsella_rubella	Carubv10003259m	479	HSF_DNA-bind	26	115	A1	6.1e-210	yes	yes	yes	23-116	138-202	220-230	412-421	464-471		104	129
	Capsella_rubella	Carubv10023839m	273	HSF_DNA-bind	69	158	B3	2.3e-131	yes	yes	yes	66-159	210-245				265-270	201	268
	Capsella_rubella	Carubv10004729m	474	HSF_DNA-bind	25	114	A5	0e	yes	yes	yes	22-115	135-192	203-218	421-430	461-468		123	208
	Capsella_rubella	Carubv10028638m	349	HSF_DNA-bind	71	160	-	-	yes	no	no	68-160						150	315
	Capsella_rubella	Carubv10014189m	324	HSF_DNA-bind	18	107	C1	5.3e-186	yes	yes	yes	15-109	123-166	188-193				115	214
	Capsella_rubella	Carubv10001065m	416	HSF_DNA-bind	57	146	A3	5.9e-170	yes	yes	yes	54-147	176-222	250-259				151	254
	Capsella_rubella	Carubv10020559m	352	HSF_DNA-bind	2	84	A8	7.6e-131	yes	yes	yes	32-100	127-184	274-282	260-269			72	183
	Capsella_rubella	Carubv10026842m	306	HSF_DNA-bind	4	65	-	-	no	yes	yes		90-147		188-197/251-260			58	165
	Capsella_rubella	Carubv10014950m	119	HSF_DNA-bind	8	100	-	-	yes	no	no	6-115
	Capsella_rubella	Carubv10024599m	143	HSF_DNA-bind	11	105	-	-	yes	no	no	7-122
	Capsella_rubella	Carubv10006026m	127	HSF_DNA-bind	12	100	-	-	yes	no	no	9-104						102	125
	Capsella_rubella	Carubv10006025m	127	HSF_DNA-bind	12	100	-	-	yes	no	no	9-104
	Capsella_rubella	Carubv10027643m	107	HSF_DNA-bind	2	76	-	-	yes	no	no	13-50
	Capsella_rubella	Carubv10021131m	135	HSF_DNA-bind	12	100	-	-	yes	no	no	9-47
	Capsella_rubella	Carubv10007333m	204	HSF_DNA-bind	18	103	-	-	yes	no	no	15-128
	Capsella_rubella	Carubv10007768m	168	HSF_DNA-bind	32	115	-	-	yes	no	no	29-90						118	164
	Capsella_rubella	Carubv10007409m	178	HSF_DNA-bind	19	103	-	-	yes	no	no	16-77						92	173
	Carica_papaya	evm.model.supercontig_55.150	279	HSF_DNA-bind	10	99	B1	3.7e-155	yes	yes	yes	7-100	154-191				232-238	148	200
	Carica_papaya	evm.model.supercontig_107.31	316	HSF_DNA-bind	12	101	B2	6.3e-173	yes	yes	yes	9-102	161-197	254-258			245-251	152	199
	Carica_papaya	evm.model.supercontig_74.64	311	HSF_DNA-bind	22	111	B2	2.8e-189	yes	yes	yes	19-112	177-213	265-269			256-262	163	219
	Carica_papaya	evm.model.supercontig_90.16	524	HSF_DNA-bind	41	130	A1	3.2e-237	yes	yes	yes	38-131	155-219	237-247	463-472	509-516		155	260
	Carica_papaya	evm.model.supercontig_50.58	377	HSF_DNA-bind	14	103	A4	3.9e-141	yes	yes	yes	11-104	129-186		234-243/349-358			110	207
	Carica_papaya	evm.model.supercontig_44.122	357	HSF_DNA-bind	32	121	A6	2.4e-195	yes	yes	yes	29-122	137-201	216-230	313-322	338-348		138	234
	Carica_papaya	evm.model.supercontig_124.4	417	HSF_DNA-bind	14	103	A4	2.1e-263	yes	yes	yes	11-104	128-185	202-205	267-276/352-361	403-410		95	188
	Carica_papaya	evm.model.supercontig_224.10	278	HSF_DNA-bind	33	122	B3	7.6e-124	yes	yes	yes	30-123	165-200				234-240	137	203
	Carica_papaya	evm.model.supercontig_52.116	370	HSF_DNA-bind	46	135	A6	2.9e-167	yes	yes	yes	43-136	156-220	235-249		354-364		150	278
	Carica_papaya	evm.model.supercontig_157.44	488	HSF_DNA-bind	27	116	A5	0e	yes	yes	yes	24-117	137-194	205-220	435-444	475-482		128	221
	Carica_papaya	evm.model.supercontig_7.163	358	HSF_DNA-bind	46	135	A2	7.6e-174	yes	yes	yes	43-136	151-215	230-243	278-286/301-308	348-352		150	237
	Carica_papaya	evm.model.supercontig_28.162	480	HSF_DNA-bind	157	246	A9	2.3e-174	yes	yes	yes	154-246	267-317	145-334	419-428	447-455		37	52
	Carica_papaya	evm.model.supercontig_1780.1	325	HSF_DNA-bind	12	101	C1	5.6e-160	yes	yes	yes	9-103	127-170	194-199				114	203
	Carica_papaya	evm.model.supercontig_27.46	236	HSF_DNA-bind	43	154	B5	5.8e-105	yes	yes	yes	40-155	189-229
	Carica_papaya	evm.model.supercontig_2.169	395	HSF_DNA-bind	15	113	A8	3.3e-163	yes	yes	yes	13-129	158-215	318-326	304-313			107	211
	Carica_papaya	evm.model.supercontig_49.32	157	HSF_DNA-bind	26	86	-	-	yes	no	no	23-116
	Carica_papaya	evm.model.supercontig_43.94	503	HSF_DNA-bind	24	82	A1	3e-171	yes	yes	yes	21-114	132-196	214-224	439-448	188-195		132	229
	Carica_papaya	evm.model.supercontig_5.77	204	HSF_DNA-bind	132	190	-	-	yes	no	no	129-190
	Citrus_clementina	Ciclev10005403m	331	HSF_DNA-bind	33	122	B2	5.9e-198	yes	yes	yes	30-123	186-222	265-269			256-262	112	125
	Citrus_clementina	Ciclev10001482m	384	HSF_DNA-bind	25	114	B4	2.4e-205	yes	yes	yes	22-115	210-246	345-348		366-378	335-341	195	242
	Citrus_clementina	Ciclev10015413m	413	HSF_DNA-bind	16	105	-	-	yes	no	no	13-106		202-205	254-263/347-356	401-408		117	208
	Citrus_clementina	Ciclev10015472m	404	HSF_DNA-bind	14	103	A4	4.9e-274	yes	yes	yes	11-104	129-186	204-207	254-263/ 339-348	390-397		119	188
	Citrus_clementina	Ciclev10006902m	361	HSF_DNA-bind	40	129	A6	1e-188	yes	yes	yes	37-130	145-209	224-238	319-328	345-355		120	247
	Citrus_clementina	Ciclev10020718m	368	HSF_DNA-bind	48	137	A6/A7	1.7e-187	yes	yes	yes	45-138	168-218		322-330	285-295		155	252
	Citrus_clementina	Ciclev10008617m	385	HSF_DNA-bind	49	138	A2	2.5e-216	yes	yes	yes	46-139	154-218	234-247	293-301/328-335/367-375	376-382		154	236
	Citrus_clementina	Ciclev10021287m	310	HSF_DNA-bind	25	114	B2	3e-189	yes	yes	yes	22-115	174-210	260-264			251-257	168	213
	Citrus_clementina	Ciclev10026273m	271	HSF_DNA-bind	10	99	B1	4e-155	yes	yes	yes	7-100	148-185				226-232	131	187
	Citrus_clementina	Ciclev10008768m	356	HSF_DNA-bind	13	102	C1	3.1e-246	yes	yes	yes	10-104	129-172	198-203				118	186
	Citrus_clementina	Ciclev10005649m	265	HSF_DNA-bind	31	120	B3	3.8e-148	yes	yes	yes	28-121	159-194	247-248			226-232	107	219
	Citrus_clementina	Ciclev10015540m	391	HSF_DNA-bind	15	104	A8	8.2e-250	yes	yes	yes	13-120	149-206	308-316	294-303			91	213
	Citrus_clementina	Ciclev10011531m	506	HSF_DNA-bind	71	160	A3	2.3e-198	yes	yes	yes	68-161	190-236	262-271	420-426/ 439-444/ 458-467/475-481			174	269
	Citrus_clementina	Ciclev10008116m	490	HSF_DNA-bind	129	218	A9	5.4e-195	yes	yes	yes	126-218	241-291	117-308	428-437	457-465		33	70
	Citrus_clementina	Ciclev10016707m	209	HSF_DNA-bind	32	125	B5	3.2e-63	yes	yes	yes	29-125	159-199	203-206				142	206
	Citrus_clementina	Ciclev10006893m	78	HSF_DNA-bind	20	78	-	-	yes	no	no	17-76
	Citrus_sinensis	orange1.1g010166m	517	HSF_DNA-bind	40	129	A1	3.8e-217	yes	yes	yes	37-130	154-218	236-246		502-509		152	301
	Citrus_sinensis	orange1.1g020146m	331	HSF_DNA-bind	33	122	B2	1.9e-198	yes	yes	yes	30-123	186-222	265-269			256-262	112	125
	Citrus_sinensis	orange1.1g018107m	361	HSF_DNA-bind	40	129	A6	2.9e-189	yes	yes	yes	37-130	145-209	224-238	319-328	345-355		145	247
	Citrus_sinensis	orange1.1g016692m	385	HSF_DNA-bind	25	114	B4	3.8e-205	yes	yes	yes	22-115	210-246	346-349		367-379	336-342	195	243
	Citrus_sinensis	orange1.1g017694m	368	HSF_DNA-bind	48	137	A6/A7	1.7e-187	yes	yes	yes	45-138	168-218		322-330	285-295		155	252
	Citrus_sinensis	orange1.1g016091m	396	HSF_DNA-bind	49	138	A2	3.8e-216	yes	yes	yes	46-139	154-218	234-247	293-301/ 328-335/367-375	376-382		154	236
	Citrus_sinensis	orange1.1g015604m	404	HSF_DNA-bind	14	103	A4	6.1e-271	yes	yes	yes	11-104	129-186	204-207	254-263/339-348	390-397		119	188
	Citrus_sinensis	orange1.1g017908m	365	HSF_DNA-bind	15	104	A1	3.1e-177	yes	yes	yes	12-105	126-190		299-308	350-357		126	202
	Citrus_sinensis	orange1.1g018495m	356	HSF_DNA-bind	13	102	C1	6.8e-248	yes	yes	yes	10-104	129-172	198-203				118	186
	Citrus_sinensis	orange1.1g015162m	413	HSF_DNA-bind	16	105	-	-	yes	no	no	13-106		202-205	254-263/347-356	401-408		118	231
	Citrus_sinensis	orange1.1g025781m	249	HSF_DNA-bind	31	120	B3	1.1e-144	yes	yes	yes	28-121	159-194				227-233	107	216
	Citrus_sinensis	orange1.1g016378m	391	HSF_DNA-bind	15	104	A8	1e-249	yes	yes	yes	13-120	149-206	308-316	294-303			91	213
	Citrus_sinensis	orange1.1g046676m	488	HSF_DNA-bind	71	160	A3	6.1e-192	yes	yes	yes	68-161	190-236	262-271	401-407/420-425/440-449/457-463			174	269
	Citrus_sinensis	orange1.1g011260m	491	HSF_DNA-bind	130	219	A9	5.3e-195	yes	yes	yes	127-219	242-292	118-309	429-438	458-466		33	70
	Citrus_sinensis	orange1.1g034429m	96	HSF_DNA-bind	20	78	-	-	yes	no	no	17-76
	Citrus_sinensis	orange1.1g026263m	242	HSF_DNA-bind	15	70	-	-	no	yes	yes		119-156				197-203	102	158
	Citrus_sinensis	orange1.1g032729m	136	HSF_DNA-bind	1	52	-	-	yes	no	no	1-52						70	133
	Cucumis_sativus	Cucsa.164290.1	180	HSF_DNA-bind	9	98	B3	8.9e-106	yes	yes	yes	6-99	128-163					88	178
	Cucumis_sativus	Cucsa.321980.1	519	HSF_DNA-bind	36	125	A1	1.2e-231	yes	yes	yes	33-126	150-214	232-242		504-511		150	251
	Cucumis_sativus	Cucsa.107610.1	289	HSF_DNA-bind	6	95	B4	1.7e-38	yes	yes	yes	30-96	151-187				366-372	134	190
	Cucumis_sativus	Cucsa.352320.1	330	HSF_DNA-bind	25	114	B4	2.8e-195	yes	yes	yes	22-115	176-212	292-295		312-324	282-288	164	209
	Cucumis_sativus	Cucsa.396040.1	375	HSF_DNA-bind	25	114	B4	1.3e-166	yes	yes	yes	22-115	198-234	329-332		367-369	319-325	186	228
	Cucumis_sativus	Cucsa.102410.1	291	HSF_DNA-bind	10	99	B1	1.3e-135	yes	yes	yes	7-100	153-190				239-245	145	261
	Cucumis_sativus	Cucsa.206000.1	342	HSF_DNA-bind	25	114	B2	7.9e-180	yes	yes	yes	22-115	179-215	284-288			275-281	174	224
	Cucumis_sativus	Cucsa.254620.1	364	HSF_DNA-bind	40	129	A6	7.1e-162	yes	yes	yes	37-130	145-209	224-238	310-319			145	269
	Cucumis_sativus	Cucsa.117100.1	290	HSF_DNA-bind	61	150	A9	6.8e-129	yes	yes	yes	58-150	183-233	49-250				14	41
	Cucumis_sativus	Cucsa.355680.1	258	HSF_DNA-bind	29	118	B4	8.7e-100	yes	yes	yes	26-119	161-197	248-251			238-244	111	116
	Cucumis_sativus	Cucsa.212820.1	410	HSF_DNA-bind	15	104	A4	8.6e-185	yes	yes	yes	12-105	131-188	206-209	258-267/345-354	396-403		122	204
	Cucumis_sativus	Cucsa.139730.1	301	HSF_DNA-bind	15	104	A4	9.9e-107	yes	yes	yes	12-105	130-187		237-246/271-280			119	267
	Cucumis_sativus	Cucsa.395060.1	365	HSF_DNA-bind	46	135	A2	9.2e-181	yes	yes	yes	43-136	150-214	229-242	275-283/320-352	353-359		151	228
	Cucumis_sativus	Cucsa.378560.1	551	HSF_DNA-bind	123	212	A3	2.3e-148	yes	yes	yes	120-213	242-288	314-323	473-479/492-497/ 505-514/522-528			202	219
	Cucumis_sativus	Cucsa.084230.2	371	HSF_DNA-bind	44	133	A6	2.4e-185	yes	yes	yes	41-134	154-218	233-247	334-343	355-365		157	257
	Cucumis_sativus	Cucsa.084230.1	375	HSF_DNA-bind	48	137	A6	3.1e-185	yes	yes	yes	45-138	158-222	237-251	338-347	359-369		161	261
	Cucumis_sativus	Cucsa.338180.1	253	HSF_DNA-bind	25	114	B3	5.2e-110	yes	yes	yes	22-115	157-192				214-220	139	239
	Cucumis_sativus	Cucsa.016480.1	350	HSF_DNA-bind	43	132	A6	2.5e-151	yes	yes	yes	40-133	150-214	228-242	315-324	335-345		150	242
	Cucumis_sativus	Cucsa.047180.1	407	HSF_DNA-bind	14	103	A4	3.9e-175	yes	yes	yes	11-104	131-188	206-209	258-267/ 341-350	393-400		122	195
	Cucumis_sativus	Cucsa.116340.1	305	HSF_DNA-bind	13	102	C1	1.1e-110	yes	yes	yes	10-104	121-164	186-191				111	166
	Cucumis_sativus	Cucsa.256700.1	468	HSF_DNA-bind	18	107	A5	3.1e-208	yes	yes	yes	15-108	128-185	196-211	430-439			118	212
	Cucumis_sativus	Cucsa.021440.1	292	HSF_DNA-bind	14	103	C1	1.4e-140	yes	yes	yes	11-105	121-164	186-191				93	171
	Cucumis_sativus	Cucsa.174120.1	397	HSF_DNA-bind	16	105	A8	9.1e-176	yes	yes	yes	14-121	150-207	314-322	300-309			117	193
	Eucalyptus_grandis	Eucgr.C03457.1.p	350	HSF_DNA-bind	12	101	A9	2.7e-115	yes	yes	yes	9-101	124-174	190-191	300-309	333-341		91	217
	Eucalyptus_grandis	Eucgr.C03433.1.p	407	HSF_DNA-bind	67	156	A9	3e-109	yes	yes	yes	64-156	179-229	55-246		379-387		176	266
	Eucalyptus_grandis	Eucgr.E00253.1.p	519	HSF_DNA-bind	39	128	A1	2.1e-217	yes	yes	yes	36-129	153-217	235-245		504-511		153	261
	Eucalyptus_grandis	Eucgr.C03431.1.p	363	HSF_DNA-bind	12	101	A9	8.9e-112	yes	yes	yes	9-101	124-174	190-191	300-309	332-340		120	230
	Eucalyptus_grandis	Eucgr.L01331.1.p	531	HSF_DNA-bind	186	275	A9	1.8e-105	yes	yes	yes	183-275	298-348	174-365	474-483	507-515		125	154
	Eucalyptus_grandis	Eucgr.C03435.1.p	461	HSF_DNA-bind	125	214	A9	1.4e-100	yes	yes	yes	122-214	237-287	113-304	413-422			68	87
	Eucalyptus_grandis	Eucgr.C03452.1.p	390	HSF_DNA-bind	71	160	A9	1.3e-87	yes	yes	yes	68-160	183-233	59-250	358-367			180	240
	Eucalyptus_grandis	Eucgr.E00555.1.p	317	HSF_DNA-bind	23	112	B2	1.7e-149	yes	yes	yes	20-113	183-219					178	235
	Eucalyptus_grandis	Eucgr.C03456.1.p	508	HSF_DNA-bind	170	259	A9	1.4e-113	yes	yes	yes	167-259	282-332	158-349	458-467	491-499		111	130
	Eucalyptus_grandis	Eucgr.A02804.1.p	330	HSF_DNA-bind	27	116	B2	1e-157	yes	yes	yes	24-117	178-214	280-284		271-277		171	214
	Eucalyptus_grandis	Eucgr.C03465.1.p	523	HSF_DNA-bind	185	274	A9	1.7e-104	yes	yes	yes	182-274	297-347	173-364	473-482	506-514		124	150
	Eucalyptus_grandis	Eucgr.K03325.1.p	354	HSF_DNA-bind	42	131	A6	3.9e-193	yes	yes	yes	39-132	148-212	227-241	319-328	335-345		155	246
	Eucalyptus_grandis	Eucgr.C03434.1.p	494	HSF_DNA-bind	151	240	A9	3.2e-121	yes	yes	yes	148-240	263-313	139-330	440-449			95	113
	Eucalyptus_grandis	Eucgr.C03440.1.p	519	HSF_DNA-bind	181	270	A9	3.9e-105	yes	yes	yes	178-270	293-343	169-360	469-478	502-510		125	152
	Eucalyptus_grandis	Eucgr.C03424.1.p	364	HSF_DNA-bind	12	101	A9	2.8e-127	yes	yes	yes	9-101	124-174	190-191	300-309	333-341		121	210
	Eucalyptus_grandis	Eucgr.C03454.1.p	508	HSF_DNA-bind	170	259	A9	4.4e-111	yes	yes	yes	167-259	282-332	158-349	458-467	491-499		111	130
	Eucalyptus_grandis	Eucgr.C00873.1.p	478	HSF_DNA-bind	138	227	A9	2.2e-143	yes	yes	yes	135-227	255-305	126-322	415-424	444-452		66	106
	Eucalyptus_grandis	Eucgr.F02327.1.p	366	HSF_DNA-bind	27	116	B4	1.2e-181	yes	yes	yes	24-117	206-242	327-330		348-360	317-323	193	238
	Eucalyptus_grandis	Eucgr.J00680.1.p	303	HSF_DNA-bind	43	132	B4	5.2e-137	yes	yes	yes	40-133	184-220	288-291			278-284	177	213
	Eucalyptus_grandis	Eucgr.K00238.1.p	287	HSF_DNA-bind	25	114	B2	8.6e-151	yes	yes	yes	22-115	162-198	243-247			234-240	155	206
	Eucalyptus_grandis	Eucgr.F00215.1.p	351	HSF_DNA-bind	26	115	B4	7.4e-168	yes	yes	yes	23-116	198-234	308-311		330-342	298-304	189	231
	Eucalyptus_grandis	Eucgr.H02675.1.p	487	HSF_DNA-bind	20	109	A5	1.6e-253	yes	yes	yes	17-110	130-187	198-213	434-443	474-481		92	207
	Eucalyptus_grandis	Eucgr.E02813.1.p	423	HSF_DNA-bind	14	103	A4	9.8e-248	yes	yes	yes	11-104	131-188	206-209	258-267/358-367	409-416		111	202
	Eucalyptus_grandis	Eucgr.C03447.1.p	492	HSF_DNA-bind	151	240	A9	1.8e-95	yes	yes	yes	148-240	261-311	139-328	436-445	468-476		94	115
	Eucalyptus_grandis	Eucgr.A02338.1.p	256	HSF_DNA-bind	27	116	B3	8.4e-164	yes	yes	yes	24-117	159-194	238-239			219-225	130	218
	Eucalyptus_grandis	Eucgr.I00929.1.p	433	HSF_DNA-bind	138	227	B1	8.2e-147	yes	yes	yes	135-228	301-338				391-397	211	229
	Eucalyptus_grandis	Eucgr.C03449.1.p	502	HSF_DNA-bind	151	240	A9	3.7e-114	yes	yes	yes	148-240	263-313	139-330	439-448	471-479		92	115
	Eucalyptus_grandis	Eucgr.H03412.1.p	377	HSF_DNA-bind	45	134	A6	8.5e-183	yes	yes	yes	42-135	152-216	231-237	334-343	362-372		153	246
	Eucalyptus_grandis	Eucgr.A01948.1.p	439	HSF_DNA-bind	14	103	-	-	yes	no	no	11-104		199-202	248-257/374-383			111	188
	Eucalyptus_grandis	Eucgr.C00664.1.p	390	HSF_DNA-bind	43	132	A2	1.1e-176	yes	yes	yes	40-133	147-211	227-240	284-292/319-326/ 359-367	368-374		150	226
	Eucalyptus_grandis	Eucgr.C03056.1.p	367	HSF_DNA-bind	52	141	A2	5.7e-193	yes	yes	yes	49-142	157-221	233-246	274-282/309-316/346-354	355-361		157	246
	Eucalyptus_grandis	Eucgr.D00627.1.p	258	HSF_DNA-bind	73	149	B5	2e-110	yes	yes	yes	28-150	195-235					2	18
	Eucalyptus_grandis	Eucgr.C01043.1.p	326	HSF_DNA-bind	23	108	C1	4.8e-121	yes	yes	yes	16-110	131-174	199-204				119	180
	Eucalyptus_grandis	Eucgr.A01544.1.p	258	HSF_DNA-bind	148	206	-	-	yes	no	no	145-206
	Eucalyptus_grandis	Eucgr.C03441.1.p	502	HSF_DNA-bind	185	223	A9	8.2e-76	yes	yes	yes	182-220	276-326	173-343	452-461	485-493		124	150
	Eutrema_salsugineum	Thhalv10025906m	288	HSF_DNA-bind	16	105	B1	8.6e-161	yes	yes	yes	13-106	154-191				240-246	95	107
	Eutrema_salsugineum	Thhalv10012033m	344	HSF_DNA-bind	36	125	B4	1.2e-183	yes	yes	yes	33-126	196-232	311-314		326-338	301-307	184	229
	Eutrema_salsugineum	Thhalv10025116m	468	HSF_DNA-bind	37	126	A1	1.8e-185	yes	yes	yes	34-127	157-221	239-249		453-460		157	260
	Eutrema_salsugineum	Thhalv10028744m	371	HSF_DNA-bind	55	144	B2	1.9e-200	yes	yes	yes	52-145	225-261	320-324			311-317	220	266
	Eutrema_salsugineum	Thhalv10002333m	349	HSF_DNA-bind	46	135	A2	1.7e-199	yes	yes	yes	43-136	155-219	235-248	277-285/327-329	340-344		159	227
	Eutrema_salsugineum	Thhalv10013428m	477	HSF_DNA-bind	28	117	A1	3.5e-226	yes	yes	yes	25-118	140-204	222-232	420-429	462-469		140	230
	Eutrema_salsugineum	Thhalv10004690m	297	HSF_DNA-bind	25	114	B2	6e-164	yes	yes	yes	22-115	170-206	253-257			244-250	101	115
	Eutrema_salsugineum	Thhalv10020829m	412	HSF_DNA-bind	61	150	A6	1e-200	yes	yes	yes	58-151	175-239	254-268	374-383	396-406		138	283
	Eutrema_salsugineum	Thhalv10003365m	286	HSF_DNA-bind	20	109	A6	6.8e-121	yes	yes	yes	17-110	128-184					95	214
	Eutrema_salsugineum	Thhalv10025409m	394	HSF_DNA-bind	16	105	A4	1.8e-187	yes	yes	yes	13-106	131-188		253-262/ 339-348	384-391		115	196
	Eutrema_salsugineum	Thhalv10020648m	475	HSF_DNA-bind	27	116	A1	5.2e-232	yes	yes	yes	24-117	138-202	221-231	408-417	460-467		138	282
	Eutrema_salsugineum	Thhalv10000950m	346	HSF_DNA-bind	14	103	A4	8.3e-202	yes	yes	yes	11-104	128-185		228-237/287-296			96	242
	Eutrema_salsugineum	Thhalv10017795m	252	HSF_DNA-bind	46	135	B3	1.5e-123	yes	yes	yes	43-136	190-225				244-249
	Eutrema_salsugineum	Thhalv10013758m	393	HSF_DNA-bind	51	140	A3	1.2e-173	yes	yes	yes	48-141	170-216	245-254				151	232
	Eutrema_salsugineum	Thhalv10002872m	336	HSF_DNA-bind	19	108	C1	3.3e-174	yes	yes	yes	16-110	125-168	190-195				107	216
	Eutrema_salsugineum	Thhalv10025090m	477	HSF_DNA-bind	29	118	A5	9e-277	yes	yes	yes	26-119	140-197	208-223	424-433	464-471		129	213
	Eutrema_salsugineum	Thhalv10006463m	265	HSF_DNA-bind	24	113	A6/A7	1.2e-119	yes	yes	yes	23-114	134-184		240-248	214-224		126	241
	Eutrema_salsugineum	Thhalv10011051m	269	HSF_DNA-bind	29	118	A6/A7	2.9e-132	yes	yes	yes	26-119	135-185		250-258	218-228		127	259
	Eutrema_salsugineum	Thhalv10018723m	376	HSF_DNA-bind	18	108	A8	2.3e-177	yes	yes	yes	16-124	154-211	299-307	285-294			98	218
	Eutrema_salsugineum	Thhalv10026540m	136	HSF_DNA-bind	13	104	-	-	yes	no	no	10-48
	Eutrema_salsugineum	Thhalv10027510m	136	HSF_DNA-bind	13	104	-	-	yes	no	no	11-121
	Eutrema_salsugineum	Thhalv10028027m	134	HSF_DNA-bind	12	100	-	-	yes	no	no	9-103
	Eutrema_salsugineum	Thhalv10012073m	178	HSF_DNA-bind	15	101	-	-	yes	no	no	9-104
	Eutrema_salsugineum	Thhalv10003411m	136	HSF_DNA-bind	16	103	-	-	yes	no	no	11-120
	Eutrema_salsugineum	Thhalv10028026m	145	HSF_DNA-bind	12	95	-	-	yes	no	no	9-47
	Eutrema_salsugineum	Thhalv10015077m	109	HSF_DNA-bind	12	99	-	-	yes	no	no	9-101
	Eutrema_salsugineum	Thhalv10026981m	94	HSF_DNA-bind	11	89	-	-	yes	no	no	23-89
	Fragaria_vesca	mrna13904.1-v1.0-hybrid	509	HSF_DNA-bind	39	128	A1	2.8e-227	yes	yes	yes	36-129	153-217	235-245		494-501		150	258
	Fragaria_vesca	mrna29004.1-v1.0-hybrid	337	HSF_DNA-bind	12	101	A6	7.6e-163	yes	yes	yes	9-102	121-186	201-215	293-302	321-331		123	225
	Fragaria_vesca	mrna13301.1-v1.0-hybrid	383	HSF_DNA-bind	30	119	B2	6.3e-121	yes	yes	yes	27-120	170-206	244-248			235-241	168	206
	Fragaria_vesca	mrna23802.1-v1.0-hybrid	498	HSF_DNA-bind	14	103	A4	8.5e-199	yes	yes	yes	11-104	132-189	207-210	251-260/433-442	484-491		111	201
	Fragaria_vesca	mrna20347.1-v1.0-hybrid	483	HSF_DNA-bind	165	254	A6	9.2e-183	yes	yes	yes	162-255	272-336	351-365	439-448	467-477		273	369
	Fragaria_vesca	mrna32416.1-v1.0-hybrid	465	HSF_DNA-bind	138	227	B2	5.8e-154	yes	yes	yes	135-228	300-336	418-422			409-415	286	338
	Fragaria_vesca	mrna24036.1-v1.0-hybrid	291	HSF_DNA-bind	10	99	B1	6.6e-154	yes	yes	yes	7-100	154-191				238-244	89	98
	Fragaria_vesca	mrna02408.1-v1.0-hybrid	717	HSF_DNA-bind	48	149	B5	4.7e-110	yes	yes	yes	49-150	190-230					53	69
	Fragaria_vesca	mrna02705.1-v1.0-hybrid	362	HSF_DNA-bind	42	131	A2	2.1e-195	yes	yes	yes	39-132	147-211	223-236	275-283/311-318/351-353			148	225
	Fragaria_vesca	mrna30881.1-v1.0-hybrid	363	HSF_DNA-bind	38	127	C1	5.1e-170	yes	yes	yes	35-129	157-200	221-226				145	230
	Fragaria_vesca	mrna10474.1-v1.0-hybrid	887	HSF_DNA-bind	16	109	A1	2.6e-189	yes	yes	yes	17-110	137-201	219-229	439-448			137	228
	Fragaria_vesca	mrna30146.1-v1.0-hybrid	417	HSF_DNA-bind	32	126	A3	6.9e-173	yes	yes	yes	29-127	156-202	228-237	342-348/361-366			140	225
	Fragaria_vesca	mrna12667.1-v1.0-hybrid	463	HSF_DNA-bind	119	223	A9	6.1e-95	yes	yes	yes	116-223	245-295	107-312	395-404	419-427		24	46
	Fragaria_vesca	mrna06570.1-v1.0-hybrid	545	HSF_DNA-bind	17	173	A5	1e-187	yes	yes	yes	14-174	194-251	262-277	498-507			161	168
	Fragaria_vesca	mrna02464.1-v1.0-hybrid	440	HSF_DNA-bind	23	105	B3	2.7e-76	yes	yes	yes	20-113	144-179				194-200	92	194
	Glycine_max	Glyma.11G056200.1.p	286	HSF_DNA-bind	11	100	B1	1.6e-137	yes	yes	yes	8-101	159-196				229-235	90	99
	Glycine_max	Glyma.01G185800.1.p	283	HSF_DNA-bind	10	99	B1	1.3e-144	yes	yes	yes	7-100	157-194				226-232	89	98
	Glycine_max	Glyma.20G156800.1.p	301	HSF_DNA-bind	24	113	B2	2.7e-209	yes	yes	yes	21-114	171-207	243-247			234-240	152	232
	Glycine_max	Glyma.16G091800.1.p	511	HSF_DNA-bind	31	120	A1	2.5e-223	yes	yes	yes	28-121	144-208	226-236		496-503		142	290
	Glycine_max	Glyma.09G143200.1.p	339	HSF_DNA-bind	34	123	B2	1.5e-199	yes	yes	yes	31-124	172-208	276-280			267-273	155	216
	Glycine_max	Glyma.11G025700.1.p	356	HSF_DNA-bind	25	114	B2	6.1e-204	yes	yes	yes	22-115	185-221	295-299			286-292	179	233
	Glycine_max	Glyma.13G105700.1.p	409	HSF_DNA-bind	75	164	A9	1.8e-202	yes	yes	yes	72-164	182-232	63-249	357-366	381-389		176	263
	Glycine_max	Glyma.01G015900.1.p	491	HSF_DNA-bind	21	110	A1	2.6e-228	yes	yes	yes	18-111	135-199	217-227		476-483		135	240
	Glycine_max	Glyma.07G235600.1.p	267	HSF_DNA-bind	26	115	B4	4.2e-123	yes	yes	yes	23-116	160-196	262-265			252-258	153	189
	Glycine_max	Glyma.16G196200.1.p	349	HSF_DNA-bind	33	122	B2	1e-204	yes	yes	yes	30-123	173-209	279-283			270-276	156	221
	Glycine_max	Glyma.20G042000.1.p	272	HSF_DNA-bind	26	115	B4	8.1e-133	yes	yes	yes	23-116	160-196	262-265			252-258	152	189
	Glycine_max	Glyma.15G086400.1.p	393	HSF_DNA-bind	15	104	A4	3.9e-246	yes	yes	yes	12-105	131-188	206-209	257-266/341-350			115	204
	Glycine_max	Glyma.01G217400.1.p	356	HSF_DNA-bind	25	114	B2	1.6e-205	yes	yes	yes	22-115	184-220	291-295			282-288	178	235
	Glycine_max	Glyma.13G225700.1.p	393	HSF_DNA-bind	15	104	A4	6.2e-246	yes	yes	yes	12-105	131-188	206-209	257-266/341-350			113	205
	Glycine_max	Glyma.10G237800.1.p	290	HSF_DNA-bind	24	113	B2	1.7e-182	yes	yes	yes	21-114	166-202	238-242			229-235	145	207
	Glycine_max	Glyma.06G040900.1.p	364	HSF_DNA-bind	25	114	B4	4.9e-203	yes	yes	yes	22-115	193-229	329-332		346-358	319-325	174	226
	Glycine_max	Glyma.02G278400.1.p	274	HSF_DNA-bind	26	115	B4	2.3e-135	yes	yes	yes	23-116	162-198	262-265			252-258	155	194
	Glycine_max	Glyma.14G036200.1.p	271	HSF_DNA-bind	26	115	B4	1.2e-128	yes	yes	yes	23-116	162-198	259-262			249-255	155	192
	Glycine_max	Glyma.08G047400.1.p	365	HSF_DNA-bind	17	106	A8	1.6e-227	yes	yes	yes	15-122	151-208	317-325	303-312			128	193
	Glycine_max	Glyma.10G029600.1.p	342	HSF_DNA-bind	42	131	A6/A7	8.2e-160	yes	yes	yes	39-132	158-208		297-305	259-269		135	274
	Glycine_max	Glyma.04G039600.1.p	364	HSF_DNA-bind	25	114	B4	1.2e-196	yes	yes	yes	22-115	192-228	329-332		346-358	319-325	177	225
	Glycine_max	Glyma.17G053700.1.p	405	HSF_DNA-bind	74	163	A9	1.7e-181	yes	yes	yes	71-163	181-231	62-248	353-362	377-385		7	19
	Glycine_max	Glyma.10G003100.1.p	338	HSF_DNA-bind	38	127	A6	2.5e-203	yes	yes	yes	35-128	143-208	223-239	296-305	322-332		117	330
	Glycine_max	Glyma.14G083700.1.p	371	HSF_DNA-bind	25	114	B4	5.7e-230	yes	yes	yes	22-115	194-230	330-333		352-365	320-326	180	226
	Glycine_max	Glyma.03G157300.1.p	387	HSF_DNA-bind	50	139	A6	7.4e-182	yes	yes	yes	47-140	171-235	250-264	338-347	371-381		171	269
	Glycine_max	Glyma.17G174900.1.p	283	HSF_DNA-bind	12	101	B1	3.7e-125	yes	yes	yes	9-102	145-182	262-268			242-248	129	193
	Glycine_max	Glyma.19G159500.1.p	371	HSF_DNA-bind	49	138	A6	1.7e-179	yes	yes	yes	46-139	159-223	238-252	328-337	355-365		158	256
	Glycine_max	Glyma.05G240500.1.p	359	HSF_DNA-bind	11	100	A8	4.4e-224	yes	yes	yes	9-116	145-202	311-319	297-306			122	187
	Glycine_max	Glyma.04G052000.1.p	373	HSF_DNA-bind	44	133	A2	8.1e-208	yes	yes	yes	41-134	152-216	230-243	275-283/312-319/352-360	361-367		153	256
	Glycine_max	Glyma.10G066100.1.p	461	HSF_DNA-bind	24	113	A3	2.1e-157	yes	yes	yes	21-114	145-191	217-226	374-380/393-398/413-422/430-436			106	226
	Glycine_max	Glyma.13G151200.1.p	455	HSF_DNA-bind	23	112	A3	3.4e-186	yes	yes	yes	20-113	144-190	215-224	369-375/388-393/407-416/424-430			99	238
	Glycine_max	Glyma.19G137800.1.p	232	HSF_DNA-bind	21	110	B3	3.2e-186	yes	yes	yes	18-111	148-183	214-215			197-203	144	198
	Glycine_max	Glyma.17G241300.1.p	375	HSF_DNA-bind	25	114	B4	2.1e-194	yes	yes	yes	22-115	197-233	332-335		356-369	322-328	181	226
	Glycine_max	Glyma.03G191100.1.p	424	HSF_DNA-bind	40	129	A3	5.2e-153	yes	yes	yes	37-130	159-205	231-240	371-377/390-395			144	225
	Glycine_max	Glyma.08G119900.1.p	403	HSF_DNA-bind	14	103	A4	0e	yes	yes	yes	11-104	128-185	203-206	254-263/338-347	389-396		96	189
	Glycine_max	Glyma.05G162300.1.p	403	HSF_DNA-bind	14	103	A4	0e	yes	yes	yes	11-104	128-185	203-206	254-263/338-347	389-396		97	189
	Glycine_max	Glyma.01G143500.1.p	210	HSF_DNA-bind	35	129	B5	3.4e-151	yes	yes	yes	32-130	162-202	204-207				38	56
	Glycine_max	Glyma.08G108600.1.p	478	HSF_DNA-bind	14	103	A5	0e	yes	yes	yes	11-104	124-181	192-207	425-434	465-472		115	198
	Glycine_max	Glyma.14G096800.1.p	365	HSF_DNA-bind	46	135	A2	1.2e-252	yes	yes	yes	43-136	152-216	232-245	283-291/307-314/347-355	356-362		132	144
	Glycine_max	Glyma.17G227600.1.p	356	HSF_DNA-bind	45	134	A2	2.1e-233	yes	yes	yes	42-135	151-215	232-245	271-279/295-302/335-343	344-350		151	236
	Glycine_max	Glyma.11G009800.1.p	465	HSF_DNA-bind	15	104	A1	4.7e-194	yes	yes	yes	12-105	127-191	209-219	399-408	453-460		127	195
	Glycine_max	Glyma.10G244000.1.p	367	HSF_DNA-bind	45	134	A6	2.7e-194	yes	yes	yes	42-135	155-219	234-248	333-342			154	248
	Glycine_max	Glyma.03G135800.1.p	232	HSF_DNA-bind	21	110	B3	1.1e-186	yes	yes	yes	18-111	148-183	214-215			197-203	101	109
	Glycine_max	Glyma.05G151800.1.p	480	HSF_DNA-bind	16	105	A5	0e	yes	yes	yes	13-106	126-183	?194-209	427-436	467-474		117	200
	Glycine_max	Glyma.20G150300.1.p	367	HSF_DNA-bind	45	134	A6	1.2e-227	yes	yes	yes	42-135	153-217	233-247	329-338	351-361		130	137
	Glycine_max	Glyma.01G233000.1.p	465	HSF_DNA-bind	15	104	A1	8.4e-210	yes	yes	yes	12-105	127-191	209-219	399-408	453-460		127	268
	Glycine_max	Glyma.09G206600.1.p	501	HSF_DNA-bind	21	120	A1	2e-168	yes	yes	yes	18-111	145-209	227-237		486-493		145	252
	Glycine_max	Glyma.13G180200.1.p	214	HSF_DNA-bind	38	132	B5	4e-158	yes	yes	yes	35-133	166-206	208-211				40	59
	Glycine_max	Glyma.09G190600.1.p	321	HSF_DNA-bind	17	106	C1	2.3e-178	yes	yes	yes	14-108	135-178	198-203				123	203
	Glycine_max	Glyma.05G095900.1.p	271	HSF_DNA-bind	16	85	B4	3.4e-49	yes	yes	yes	20-86	134-170	241-244			231-237	118	172
	Glycine_max	Glyma.07G086300.1.p	91	HSF_DNA-bind	15	78	-	-	yes	no	no	12-73
	Glycine_max	Glyma.19G191700.1.p	100	HSF_DNA-bind	36	92	-	-	yes	no	no	31-92
	Gossypium_raimondii	Gorai.003G023500.1	296	HSF_DNA-bind	10	99	B1	2.2e-187	yes	yes	yes	7-100	160-197				247-253	145	199
	Gossypium_raimondii	Gorai.003G183900.1	516	HSF_DNA-bind	45	134	A1	1.4e-217	yes	yes	yes	42-135	159-223	241-251	455-464	501-508		159	285
	Gossypium_raimondii	Gorai.007G053900.1	296	HSF_DNA-bind	10	99	B1	2.4e-139	yes	yes	yes	7-100	154-191				246-252	82	99
	Gossypium_raimondii	Gorai.007G010900.1	327	HSF_DNA-bind	27	116	B2	8.1e-177	yes	yes	yes	24-117	175-211	255-259			246-252	158	218
	Gossypium_raimondii	Gorai.007G033300.1	480	HSF_DNA-bind	46	135	A1	2.5e-193	yes	yes	yes	43-136	160-224	242-252				160	262
	Gossypium_raimondii	Gorai.008G225200.1	512	HSF_DNA-bind	45	134	A1	1.8e-221	yes	yes	yes	42-135	159-223	241-251		497-504		159	257
	Gossypium_raimondii	Gorai.011G105700.1	285	HSF_DNA-bind	10	99	B1	5.8e-161	yes	yes	yes	7-100	153-190				236-242	144	191
	Gossypium_raimondii	Gorai.010G020700.1	325	HSF_DNA-bind	25	114	B4	2.4e-179	yes	yes	yes	22-115	194-230	287-290		308-320	277-283	186	224
	Gossypium_raimondii	Gorai.011G036400.1	404	HSF_DNA-bind	14	103	A4	2.3e-262	yes	yes	yes	11-104	130-187	205-208	254-263/ 339-348	390-397		116	203
	Gossypium_raimondii	Gorai.009G213100.1	361	HSF_DNA-bind	25	114	B4	1.4e-200	yes	yes	yes	22-115	195-231	326-329		344-356	316-322	186	227
	Gossypium_raimondii	Gorai.004G208800.1	312	HSF_DNA-bind	28	117	B2	6.7e-186	yes	yes	yes	25-118	172-208	263-267			254-260	160	220
	Gossypium_raimondii	Gorai.008G170800.1	358	HSF_DNA-bind	15	104	A8	5e-234	yes	yes	yes	13-120	152-209	307-315	293-302			94	205
	Gossypium_raimondii	Gorai.006G224000.1	476	HSF_DNA-bind	24	113	A5	4.5e-228	yes	yes	yes	21-114	134-191	202-217	424-433	464-471		125	220
	Gossypium_raimondii	Gorai.007G139600.1	346	HSF_DNA-bind	44	133	A6	1.7e-162	yes	yes	yes	41-134	151-215	230-244	321-330			152	249
	Gossypium_raimondii	Gorai.003G160600.1	311	HSF_DNA-bind	29	118	B2	1.9e-188	yes	yes	yes	26-119	170-206	262-266			253-259	163	221
	Gossypium_raimondii	Gorai.008G244400.1	312	HSF_DNA-bind	21	110	B2	2.7e-162	yes	yes	yes	18-111	165-201	255-259			246-252	160	243
	Gossypium_raimondii	Gorai.012G044200.1	395	HSF_DNA-bind	14	103	A4	4.1e-140	yes	yes	yes	11-104	129-186		241-250			110	204
	Gossypium_raimondii	Gorai.002G135200.1	333	HSF_DNA-bind	25	114	B4	4.4e-176	yes	yes	yes	22-115	176-212	298-301		317-324	288-294	164	205
	Gossypium_raimondii	Gorai.009G032300.1	449	HSF_DNA-bind	118	207	A9	1.7e-178	yes	yes	yes	115-207	230-280	106-297	390-399	419-427		32	73
	Gossypium_raimondii	Gorai.004G076900.1	363	HSF_DNA-bind	47	136	A6	1.8e-190	yes	yes	yes	44-137	153-217	232-246	319-328	347-357		157	252
	Gossypium_raimondii	Gorai.010G240800.1	385	HSF_DNA-bind	14	103	A4	3.5e-229	yes	yes	yes	11-104	130-187	205-208	245-254/ 319-328	371-378		118	191
	Gossypium_raimondii	Gorai.006G158000.1	483	HSF_DNA-bind	51	140	A3	4.7e-179	yes	yes	yes	48-141	170-216	242-251	395-401/414-419/ 433-442/450-456			154	249
	Gossypium_raimondii	Gorai.N013300.1	358	HSF_DNA-bind	15	104	A8	7.8e-211	yes	yes	yes	13-120	154-211	314-322	300-309			118	205
	Gossypium_raimondii	Gorai.006G125000.1	259	HSF_DNA-bind	21	110	B4	5.6e-111	yes	yes	yes	18-111	154-190	251-254			241-247	146	182
	Gossypium_raimondii	Gorai.001G012700.1	346	HSF_DNA-bind	84	173	A9	2.3e-158	yes	yes	yes	81-173	199-249	72-266				187	257
	Gossypium_raimondii	Gorai.013G220400.1	407	HSF_DNA-bind	50	139	A2	1.6e-257	yes	yes	yes	47-140	157-221	11_24	285-293/320-327/360-368	369-375		130	145
	Gossypium_raimondii	Gorai.005G102000.1	339	HSF_DNA-bind	25	114	B4	3.8e-177	yes	yes	yes	22-115	182-218	303-306		321-333	293-299	171	216
	Gossypium_raimondii	Gorai.011G168400.1	358	HSF_DNA-bind	42	131	A6	6.8e-173	yes	yes	yes	39-132	147-211	226-240	311-320	342-352		148	263
	Gossypium_raimondii	Gorai.006G242400.1	341	HSF_DNA-bind	43	132	A6	2.2e-182	yes	yes	yes	40-133	148-212	227-241	296-305	325-335		152	256
	Gossypium_raimondii	Gorai.003G053300.1	503	HSF_DNA-bind	24	113	A1	6.4e-235	yes	yes	yes	21-114	135-199	217-227	437-446	488-495		135	240
	Gossypium_raimondii	Gorai.004G257000.1	505	HSF_DNA-bind	25	114	A1	3.1e-248	yes	yes	yes	22-115	136-200	218-228	437-446	489-496		136	243
	Gossypium_raimondii	Gorai.005G027500.1	495	HSF_DNA-bind	24	113	A5	6.7e-280	yes	yes	yes	21-114	134-191	202-217	442-451	482-489		123	212
	Gossypium_raimondii	Gorai.003G091700.1	241	HSF_DNA-bind	25	114	B3	8.4e-142	yes	yes	yes	22-115	153-188	223-224			202-208	104	202
	Gossypium_raimondii	Gorai.006G087100.1	190	HSF_DNA-bind	26	121	B5	2.8e-86	yes	yes	yes	23-122	150-190					121	187
	Gossypium_raimondii	Gorai.011G027400.1	221	HSF_DNA-bind	24	125	B5	1.1e-107	yes	yes	yes	21-126	173-213					161	219
	Gossypium_raimondii	Gorai.010G070900.1	341	HSF_DNA-bind	13	102	C1	3.3e-206	yes	yes	yes	10-104	122-165	187-192				89	195
	Gossypium_raimondii	Gorai.004G280100.1	328	HSF_DNA-bind	13	102	C1	9.2e-122	yes	yes	yes	10-104	132-175					128	179
	Gossypium_raimondii	Gorai.009G024700.1	350	HSF_DNA-bind	12	101	C1	5.8e-167	yes	yes	yes	9-103	127-170	192-197				89	190
	Gossypium_raimondii	Gorai.013G183500.1	400	HSF_DNA-bind	25	105	-	-	yes	no	no	22-115		182-192	368-377			92	208
	Gossypium_raimondii	Gorai.004G284200.1	466	HSF_DNA-bind	32	94	A9	3.2e-83	yes	yes	yes	43-94	138-188	24-205	409-418	437-445		90	244
	Linum_usitatissimum	Lus10011185	205	HSF_DNA-bind	33	122	B5	2.3e-93	yes	yes	yes	30-123	156-196	199-202				132	203
	Linum_usitatissimum	Lus10040091	472	HSF_DNA-bind	47	136	A1	1.4e-203	yes	yes	yes	44-137	161-225	243-253		456-463		152	263
	Linum_usitatissimum	Lus10030956	472	HSF_DNA-bind	47	136	A1	1.6e-208	yes	yes	yes	44-137	161-225	243-253		456-463		156	266
	Linum_usitatissimum	Lus10018488	201	HSF_DNA-bind	34	123	B5	4.7e-95	yes	yes	yes	31-124	157-197					135	193
	Linum_usitatissimum	Lus10008007	366	HSF_DNA-bind	47	136	B2	6.8e-176	yes	yes	yes	44-137	196-232	296-300			287-293	188	235
	Linum_usitatissimum	Lus10011065	459	HSF_DNA-bind	43	132	A1	1.7e-203	yes	yes	yes	40-133	155-219	237-247		443-450		153	262
	Linum_usitatissimum	Lus10024508	409	HSF_DNA-bind	92	181	B2	4.8e-164	yes	yes	yes	89-182	239-275	62-66			53-59	233	277
	Linum_usitatissimum	Lus10000312	459	HSF_DNA-bind	43	132	A1	1.1e-202	yes	yes	yes	40-133	155-219	237-247		443-450		153	264
	Linum_usitatissimum	Lus10006618	395	HSF_DNA-bind	47	136	A6	1.2e-153	yes	yes	yes	44-137	152-216	231-246		365-375		153	246
	Linum_usitatissimum	Lus10019348	274	HSF_DNA-bind	10	99	B1	4.3e-136	yes	yes	yes	7-100	165-202				238-244	82	100
	Linum_usitatissimum	Lus10014698	379	HSF_DNA-bind	43	132	A6	1.1e-166	yes	yes	yes	40-133	167-231	246-260	341-350	362-372		166	274
	Linum_usitatissimum	Lus10014994	308	HSF_DNA-bind	29	118	B2	8e-134	yes	yes	yes	26-119	177-213	255-259			246-252	166	218
	Linum_usitatissimum	Lus10039376	374	HSF_DNA-bind	45	134	A6	2.2e-155	yes	yes	yes	42-135	150-214	229-244	328-337	358-368		152	244
	Linum_usitatissimum	Lus10011941	459	HSF_DNA-bind	125	214	A9	1.5e-168	yes	yes	yes	122-214	251-301	113-318				50	82
	Linum_usitatissimum	Lus10029269	267	HSF_DNA-bind	14	103	A4	5.3e-140	yes	yes	yes	11-104	131-188	206-209				111	205
	Linum_usitatissimum	Lus10022083	377	HSF_DNA-bind	49	138	A6	1.5e-133	yes	yes	yes	46-139	170-234	255-262	325-334	349-359		163	272
	Linum_usitatissimum	Lus10001133	405	HSF_DNA-bind	33	122	B4	3.7e-160	yes	yes	yes	30-123	219-255	356-359		387-399	346-352	206	249
	Linum_usitatissimum	Lus10027627	474	HSF_DNA-bind	133	222	A9	4.8e-165	yes	yes	yes	130-222	257-307	121-324	412-421	440-448		42	45
	Linum_usitatissimum	Lus10042646	411	HSF_DNA-bind	33	122	B4	3.4e-158	yes	yes	yes	30-123	224-260	360-363		393-405	350-356	212	254
	Linum_usitatissimum	Lus10007318	414	HSF_DNA-bind	14	103	A4	1.2e-211	yes	yes	yes	11-104	131-188	206-209	259-268/347-356	400-407		111	205
	Linum_usitatissimum	Lus10015237	404	HSF_DNA-bind	14	103	A4	1.5e-202	yes	yes	yes	11-104	134-191	206-209	253-262/338-347	390-397		117	195
	Linum_usitatissimum	Lus10005420	491	HSF_DNA-bind	14	103	A4	1.4e-190	yes	yes	yes	11-104	134-191	210-213	257-266/342-351			115	202
	Linum_usitatissimum	Lus10000492	375	HSF_DNA-bind	43	132	A6	1.1e-162	yes	yes	yes	40-133	166-230	245-259	337-346	358-368		165	269
	Linum_usitatissimum	Lus10013797	342	HSF_DNA-bind	47	136	A2	6e-121	yes	yes	yes	44-137	163-227		319-327	328-334		158	251
	Linum_usitatissimum	Lus10040911	459	HSF_DNA-bind	13	102	A1	2.6e-181	yes	yes	yes	10-103	124-188	206-216	398-407	444-451		124	191
	Linum_usitatissimum	Lus10001591	374	HSF_DNA-bind	16	105	A8	4.4e-162	yes	yes	yes	14-121	151-208	309-317	295-304			125	194
	Linum_usitatissimum	Lus10003707	374	HSF_DNA-bind	16	105	A8	1.9e-156	yes	yes	yes	14-121	151-208	309-317	295-304			126	194
	Linum_usitatissimum	Lus10016634	486	HSF_DNA-bind	23	112	-	-	yes	no	yes	20-113	159-189	200-215	433-442	473-480		124	221
	Linum_usitatissimum	Lus10023636	307	HSF_DNA-bind	26	115	C1	3.7e-132	yes	yes	yes	23-117	140-183	202-207				101	184
	Linum_usitatissimum	Lus10034907	308	HSF_DNA-bind	21	110	C1	1.8e-128	yes	yes	yes	18-112	135-178	197-202				97	179
	Linum_usitatissimum	Lus10009351	284	HSF_DNA-bind	10	112	B1	7e-84	yes	yes	yes	7-100	174-211				247-253	95	113
	Linum_usitatissimum	Lus10022546	494	HSF_DNA-bind	23	120	-	-	yes	no	yes	20-121	167-197	208-223	441-450	481-488		132	224
	Linum_usitatissimum	Lus10026819	166	HSF_DNA-bind	16	116	-	-	yes	no	no	13-117
	Linum_usitatissimum	Lus10036062	317	HSF_DNA-bind	36	129	B4	1.9e-112	yes	yes	yes	33-130	194-230	294-297			284-290	1	27
	Linum_usitatissimum	Lus10014369	447	HSF_DNA-bind	72	178	A3	1.4e-147	yes	yes	yes	69-179	199-245	273-282	403-412/420-426			160	274
	Linum_usitatissimum	Lus10039134	370	HSF_DNA-bind	47	173	A2	4.6e-120	yes	yes	yes	9-174	194-258		317-324	359-363		189	277
	Linum_usitatissimum	Lus10023866	442	HSF_DNA-bind	72	177	A3	5.7e-138	yes	yes	yes	69-178	197-243	264-273	398-407/415-421			183	266
	Linum_usitatissimum	Lus10038874	268	HSF_DNA-bind	29	116	-	-	yes	no	no	26-119		216-220			207-213	121	177
	Linum_usitatissimum	Lus10005925	86	HSF_DNA-bind	13	75	-	-	yes	no	no	10-71
	Malus_domestica	MDP0000155667	276	HSF_DNA-bind	26	115	B2	1.2e-135	yes	yes	yes	23-116	161-197	243-247			234-240	154	198
	Malus_domestica	MDP0000150429	345	HSF_DNA-bind	74	163	B2	1.1e-180	yes	yes	yes	71-164	209-245	291-295			282-288	197	250
	Malus_domestica	MDP0000260377	345	HSF_DNA-bind	74	163	B2	1.2e-180	yes	yes	yes	71-164	209-245	291-295			282-288	197	250
	Malus_domestica	MDP0000253499	356	HSF_DNA-bind	34	123	A6	3.5e-169	yes	yes	yes	31-124	140-204	219-233	313-322	341-351		141	247
	Malus_domestica	MDP0000127499	337	HSF_DNA-bind	32	121	B2	1.6e-169	yes	yes	yes	29-122	185-221	296-300			287-293	176	224
	Malus_domestica	MDP0000119199	440	HSF_DNA-bind	49	138	A6	7.6e-174	yes	yes	yes	46-139	155-219	234-248	322-331	350-360		156	253
	Malus_domestica	MDP0000273175	433	HSF_DNA-bind	111	200	A6	9.4e-168	yes	yes	yes	?108-201	217-281	296-310	390-399	418-428		218	324
	Malus_domestica	MDP0000527802	295	HSF_DNA-bind	10	99	B1	1.4e-139	yes	yes	yes	7-100	154-191				239-245	83	98
	Malus_domestica	MDP0000129357	383	HSF_DNA-bind	25	114	B4	2.9e-187	yes	yes	yes	22-115	204-240	340-343		366-378	330-336	185	234
	Malus_domestica	MDP0000209135	381	HSF_DNA-bind	25	114	B4	2.4e-188	yes	yes	yes	22-115	203-239	338-341		364-376	328-334	184	233
	Malus_domestica	MDP0000155579	440	HSF_DNA-bind	15	104	A4	3.4e-179	yes	yes	yes	12-105	129-186	204-207	252-261/ 378-387	429-436		98	208
	Malus_domestica	MDP0000319910	652	HSF_DNA-bind	330	419	A6	4.3e-169	yes	yes	yes	327-420	436-500	515-529	609-618	637-647		110	127
	Malus_domestica	MDP0000202716	243	HSF_DNA-bind	23	112	B3	1.3e-155	yes	yes	yes	20-113	158-193	226-227			209-215	141	236
	Malus_domestica	MDP0000622590	244	HSF_DNA-bind	23	112	B3	3.9e-148	yes	yes	yes	20-113	158-193	226-227			209-215	142	237
	Malus_domestica	MDP0000243895	377	HSF_DNA-bind	42	131	A2	4.9e-212	yes	yes	yes	39-132	148-212	226-239	278-286/ 315-322/356-364	365-371		152	232
	Malus_domestica	MDP0000301101	483	HSF_DNA-bind	16	105	A5	0e	yes	yes	yes	13-106	126-183	194-209	431-440	471-478		116	200
	Malus_domestica	MDP0000263056	546	HSF_DNA-bind	135	224	A4	6.6e-223	yes	yes	yes	132-225	252-309	327-330	371-380/ 482-491	533-540		53	55
	Malus_domestica	MDP0000613011	484	HSF_DNA-bind	16	105	A5	0e	yes	yes	yes	13-106	126-183	194-209	431-440	471-478		114	198
	Malus_domestica	MDP0000319456	482	HSF_DNA-bind	143	232	A9	3e-161	yes	yes	yes	140-232	251-301	131-318	425-434	449-457		24	67
	Malus_domestica	MDP0000191541	414	HSF_DNA-bind	22	111	A8	3.4e-205	yes	yes	yes	20-127	156-213	322-330	308-317			133	200
	Malus_domestica	MDP0000230456	324	HSF_DNA-bind	11	100	C1	2.3e-150	yes	yes	yes	8-102	128-171	194-199				108	202
	Malus_domestica	MDP0000172376	411	HSF_DNA-bind	22	111	A8	7.4e-166	yes	yes	yes	20-127	154-211	320-328	306-315			131	199
	Malus_domestica	MDP0000148722	438	HSF_DNA-bind	22	111	A8	4.8e-166	yes	yes	yes	20-127	154-211	320-328	306-315			131	199
	Malus_domestica	MDP0000126826	430	HSF_DNA-bind	14	113	A4	9.2e-152	yes	yes	yes	11-104	143-200	218-221	262-271/366-375	417-424		122	221
	Malus_domestica	MDP0000155849	430	HSF_DNA-bind	14	113	A4	1.2e-151	yes	yes	yes	11-104	143-200	218-221	262-271/366-375	417-424		122	221
	Malus_domestica	MDP0000320827	344	HSF_DNA-bind	13	102	C1	1.8e-167	yes	yes	yes	10-104	137-180	203-208				127	206
	Malus_domestica	MDP0000489886	381	HSF_DNA-bind	34	132	A2	6.6e-195	yes	yes	yes	31-133	149-213	229-242	281-289/318-325/359-367	368-374		150	245
	Malus_domestica	MDP0000194672	713	HSF_DNA-bind	148	278	A9	1.1e-103	yes	yes	yes	145-278	297-347	136-364				24	63
	Malus_domestica	MDP0000156337	546	HSF_DNA-bind	21	152	A1	1e-181	yes	yes	yes	18-111	176-240	258-268	482-491	532-539		73	115
	Malus_domestica	MDP0000190783	265	HSF_DNA-bind	158	238	-	-	yes	no	no	155-247		146-152				239	257
	Malus_domestica	MDP0000163338	222	HSF_DNA-bind	14	142	B5	3.3e-57	yes	yes	yes	11-143	177-217					132	221
	Malus_domestica	MDP0000232623	550	HSF_DNA-bind	20	156	A1	3.3e-177	yes	yes	yes	17-110	180-244	262-272	486-495	536-543		175	276
	Malus_domestica	MDP0000606400	456	HSF_DNA-bind	103	232	A3	3.3e-156	yes	yes	yes	100-233	262-308	334-343				246	324
	Malus_domestica	MDP0000156088	513	HSF_DNA-bind	15	197	A4	1.3e-106	yes	yes	yes	12-105	223-280	298-301	340-349/465-474			211	302
	Malus_domestica	MDP0000239602	136	HSF_DNA-bind	53	119	-	-	yes	no	no	50-109
	Malus_domestica	MDP0000174161	582	HSF_DNA-bind	103	244	A3	8.1e-226	yes	yes	yes	100-245	274-320	346-355	499-505/518-523/538-547/555-561			258	336
	Malus_domestica	MDP0000456290	395	HSF_DNA-bind	319	394	-	-	yes	no	no	316-375
	Malus_domestica	MDP0000746803	395	HSF_DNA-bind	319	394	-	-	yes	no	no	316-375
	Malus_domestica	MDP0000498229	241	HSF_DNA-bind	138	200	-	-	yes	no	no	135-228						17	44
	Malus_domestica	MDP0000325078	124	HSF_DNA-bind	57	115	-	-	yes	no	no	54-113
	Malus_domestica	MDP0000589639	282	HSF_DNA-bind	99	177	-	-	yes	no	no	96-189						27	60
	Malus_domestica	MDP0000216861	296	HSF_DNA-bind	226	291	-	-	yes	no	no	223-236
	Manihot_esculenta	Manes.13G124500.1.p	290	HSF_DNA-bind	10	99	B1	1.5e-152	yes	yes	yes	7-100	160-197				258-264	89	97
	Manihot_esculenta	Manes.02G225800.1.p	521	HSF_DNA-bind	46	135	A1	4.1e-239	yes	yes	yes	14-107	126-190	208-218	434-443	485-492		160	263
	Manihot_esculenta	Manes.05G081700.1.p	317	HSF_DNA-bind	12	101	A6	1.9e-150	yes	yes	yes	9-102	119-183	204-211	284-293	301-311		119	222
	Manihot_esculenta	Manes.18G038600.1.p	360	HSF_DNA-bind	25	114	B4	2.9e-193	yes	yes	yes	22-115	194-230	322-325		342-354	312-318	185	226
	Manihot_esculenta	Manes.03G173200.1.p	359	HSF_DNA-bind	41	130	A6	2e-198	yes	yes	yes	38-131	146-210	225-239	315-324	340-350		3	12
	Manihot_esculenta	Manes.01G065200.1.p	339	HSF_DNA-bind	30	119	B2	2.9e-196	yes	yes	yes	27-120	184-220	282-286			273-279	179	222
	Manihot_esculenta	Manes.12G101000.1.p	289	HSF_DNA-bind	10	99	B1	5.2e-147	yes	yes	yes	7-100	161-198				255-261	87	98
	Manihot_esculenta	Manes.14G027700.1.p	313	HSF_DNA-bind	25	114	B2	2.2e-172	yes	yes	yes	22-115	174-210	259-263			250-256	166	211
	Manihot_esculenta	Manes.02G087400.1.p	402	HSF_DNA-bind	16	105	A4	9.9e-153	yes	yes	yes	13-106	129-186	204-207	246-255/346-355	388-395		116	200
	Manihot_esculenta	Manes.03G035500.1.p	420	HSF_DNA-bind	100	189	A9	6e-193	yes	yes	yes	97-189	210-260	88-277	380-389			173	356
	Manihot_esculenta	Manes.02G136700.1.p	275	HSF_DNA-bind	26	115	B4	5.5e-129	yes	yes	yes	23-116	160-196	261-264			251-257	151	189
	Manihot_esculenta	Manes.15G032900.1.p	360	HSF_DNA-bind	42	131	A6	8.7e-187	yes	yes	yes	39-132	147-211	226-240	320-329	344-354		147	243
	Manihot_esculenta	Manes.S044100.1.p	409	HSF_DNA-bind	14	103	A4	4.7e-258	yes	yes	yes	11-104	132-189	208-211	260-269/344-353	395-402		113	211
	Manihot_esculenta	Manes.01G177700.1.p	266	HSF_DNA-bind	26	115	B4	4.7e-116	yes	yes	yes	23-116	161-197	257-260			247-253	153	190
	Manihot_esculenta	Manes.16G100700.1.p	453	HSF_DNA-bind	117	206	A9	1.2e-230	yes	yes	yes	114-206	227-277	105-294	397-406	424-432		34	63
	Manihot_esculenta	Manes.05G174900.1.p	359	HSF_DNA-bind	25	114	B4	1.2e-190	yes	yes	yes	22-115	193-229	321-324		341-353	311-317	184	223
	Manihot_esculenta	Manes.17G060600.1.p	405	HSF_DNA-bind	14	103	A4	1.2e-283	yes	yes	yes	?11-104	130-187	206-209	256-265/340-349	391-398		117	209
	Manihot_esculenta	Manes.08G020700.1.p	508	HSF_DNA-bind	131	220	A3	2.5e-189	yes	yes	yes	128-221	250-296	322-331	480-486/499-504			235	326
	Manihot_esculenta	Manes.01G204200.1.p	352	HSF_DNA-bind	43	132	A6	6.4e-180	yes	yes	yes	40-133	149-213	234-241	317-326	336-346		148	249
	Manihot_esculenta	Manes.16G026700.1.p	222	HSF_DNA-bind	39	143	B5	8.1e-137	yes	yes	yes	36-144	174-214	216-219				152	211
	Manihot_esculenta	Manes.15G057200.1.p	493	HSF_DNA-bind	23	112	A5	0e	yes	yes	yes	20-113	133-190	201-216	440-449	480-487		127	218
	Manihot_esculenta	Manes.03G020500.1.p	296	HSF_DNA-bind	21	110	C1	5.3e-144	yes	yes	yes	18-112	132-175					96	181
	Manihot_esculenta	Manes.08G051600.1.p	241	HSF_DNA-bind	27	116	B3	5.7e-169	yes	yes	yes	24-117	154-189	223-224			206-212	134	207
	Manihot_esculenta	Manes.09G127300.1.p	493	HSF_DNA-bind	12	101	A1	1.7e-230	yes	yes	yes	9-102	123-187	205-215	427-436	478-485		122	227
	Manihot_esculenta	Manes.01G129900.1.p	415	HSF_DNA-bind	15	104	A4	4.4e-172	yes	yes	yes	12-105	129-186	204-207	246-255/ 359-368	401-408		91	193
	Manihot_esculenta	Manes.16G081500.1.p	346	HSF_DNA-bind	47	136	A2	3.5e-143	yes	yes	yes	44-103	145-209	225-238	279-287/311-318			129	211
	Manihot_esculenta	Manes.17G044800.1.p	218	HSF_DNA-bind	38	138	B5	5.7e-131	yes	yes	yes	35-139	170-210	212-215				146	216
	Manihot_esculenta	Manes.16G116200.1.p	366	HSF_DNA-bind	58	147	C1	4.3e-202	yes	yes	yes	55-149	167-210	231-236				137	151
	Manihot_esculenta	Manes.09G020300.1.p	242	HSF_DNA-bind	28	117	B3	2.5e-162	yes	yes	yes	25-118	155-190	224-225			209-215	132	211
	Manihot_esculenta	Manes.15G136500.1.p	361	HSF_DNA-bind	2	83	A8	3.4e-181	yes	yes	yes	31-99	128-185	289-297	275-284			105	172
	Manihot_esculenta	Manes.03G049500.1.p	349	HSF_DNA-bind	36	101	A2	1.2e-170	yes	yes	yes	32-91	119-183	199-212	253-261/288-295/ 328-336	337-343		92	102
	Manihot_esculenta	Manes.09G060600.1.p	398	HSF_DNA-bind	20	50	A3	3.5e-163	yes	yes	yes	20-51	81-127	153-162	311-317/330-335/350-359/367-373			65	142
	Medicago_truncatula	Medtr0020s0020.1	342	HSF_DNA-bind	34	123	B2	3.5e-162	yes	yes	yes	31-124	193-229	283-287			274-280	179	243
	Medicago_truncatula	Medtr5g017470.1	289	HSF_DNA-bind	10	99	B1	3.7e-164	yes	yes	yes	7-100	156-193				230-236	149	208
	Medicago_truncatula	Medtr5g010680.1	360	HSF_DNA-bind	25	114	B2	2.8e-172	yes	yes	yes	22-115	183-219	300-304			291-297	170	234
	Medicago_truncatula	Medtr7g095680.1	362	HSF_DNA-bind	50	139	A6	7.4e-175	yes	yes	yes	47-140	160-224	239-253	315-324	346-356		160	259
	Medicago_truncatula	Medtr5g029680.1	503	HSF_DNA-bind	33	122	A1	3.7e-225	yes	yes	yes	30-123	147-211	229-239		488-495		147	253
	Medicago_truncatula	Medtr3g101870.1	374	HSF_DNA-bind	25	114	B4	2.8e-191	yes	yes	yes	22-115	194-230	332-335		353-368	322-328	179	227
	Medicago_truncatula	Medtr4g126070.1	423	HSF_DNA-bind	102	191	A9	6.6e-202	yes	yes	yes	99-191	209-259	90-276	372-381	396-404		44	74
	Medicago_truncatula	Medtr5g089170.1	255	HSF_DNA-bind	26	115	B4	1.8e-132	yes	yes	yes	23-116	159-195	246-249			236-242	149	189
	Medicago_truncatula	Medtr4g077970.1	494	HSF_DNA-bind	13	102	A1	9.5e-225	yes	yes	yes	10-103	126-190	207-217	424-433	478-485		126	194
	Medicago_truncatula	Medtr6g043060.1	330	HSF_DNA-bind	23	112	A5	1.7e-187	yes	yes	yes	20-113	133-189	200-215	307-316			123	223
	Medicago_truncatula	Medtr1g100777.1	304	HSF_DNA-bind	19	108	B2	7.3e-179	yes	yes	yes	16-109	160-196	249-253			240-246	144	208
	Medicago_truncatula	Medtr8g087540.1	402	HSF_DNA-bind	13	102	A4	9.9e-273	yes	yes	yes	10-103	127-184	202-205	254-263/337-346	388-395		95	206
	Medicago_truncatula	Medtr8g083100.1	488	HSF_DNA-bind	23	112	A5	0e	yes	yes	yes	20-113	133-189	200-215	435-444	475-482		124	215
	Medicago_truncatula	Medtr7g091370.1	234	HSF_DNA-bind	23	112	B3	7.7e-185	yes	yes	yes	20-113	146-181	212-217			198-204	94	232
	Medicago_truncatula	Medtr1g071360.1	373	HSF_DNA-bind	30	119	A6/A7	7.6e-165	yes	yes	yes	27-120	140-190		291-299	250-260		116	230
	Medicago_truncatula	Medtr8g105780.1	372	HSF_DNA-bind	23	113	A8	2e-248	yes	yes	yes	21-129	159-216	325-333	311-320			131	200
	Medicago_truncatula	Medtr1g061170.3	460	HSF_DNA-bind	50	139	A3	9.6e-150	yes	yes	yes	47-140	169-215	241-250	381-387/400-405/418-427/435-441			153	263
	Medicago_truncatula	Medtr4g088900.1	211	HSF_DNA-bind	34	127	B5	1.6e-124	yes	yes	yes	31-128	163-203	205-208
	Medicago_truncatula	Medtr2g100680.1	455	HSF_DNA-bind	32	121	A5	0e	yes	yes	yes	29-122	142-199	210-225	445-454			133	226
	Medicago_truncatula	Medtr6g086805.1	346	HSF_DNA-bind	12	101	C1	2.5e-146	yes	yes	yes	9-103	136-179	199-204				117	205
	Medicago_truncatula	Medtr2g017890.1	384	HSF_DNA-bind	16	105	A4	9.3e-164	yes	yes	yes	13-106	133-190		249-258			88	206
	Medicago_truncatula	Medtr1g102860.1	331	HSF_DNA-bind	41	130	A6	8.5e-184	yes	yes	yes	38-131	146-211	226-240	294-303	314-324		121	141
	Medicago_truncatula	Medtr3g104550.1	379	HSF_DNA-bind	47	136	A2	2.7e-222	yes	yes	yes	44-137	154-218	230-243	289-297/321-328/361-369	370-376		123	255
	Medicago_truncatula	Medtr2g100670.1	420	HSF_DNA-bind	142	229	A5	8.5e-195	yes	yes	yes	139-232	252-309	320-335				243	325
	Medicago_truncatula	Medtr4g045757.1	80	HSF_DNA-bind	15	71	-	-	yes	no	no	12-71
	Medicago_truncatula	Medtr5g047190.1	99	HSF_DNA-bind	1	88	-	-	yes	no	no	13-91
	Phaseolus_vulgaris	Phvul.002G138500.1	491	HSF_DNA-bind	21	110	A1	6.1e-222	yes	yes	yes	18-111	135-199	217-227		476-483		135	239
	Phaseolus_vulgaris	Phvul.007G067800.1	305	HSF_DNA-bind	24	113	B2	9.7e-184	yes	yes	yes	21-114	170-206	249-253			240-246	150	220
	Phaseolus_vulgaris	Phvul.006G015700.1	270	HSF_DNA-bind	26	115	B4	4.3e-127	yes	yes	yes	23-116	160-196	261-264			251-257	148	190
	Phaseolus_vulgaris	Phvul.002G019100.1	285	HSF_DNA-bind	10	99	B1	1.1e-132	yes	yes	yes	7-100	158-195				227-233	144	196
	Phaseolus_vulgaris	Phvul.002G155300.1	357	HSF_DNA-bind	25	114	B2	3.1e-189	yes	yes	yes	22-115	183-219	292-296			283-289	177	231
	Phaseolus_vulgaris	Phvul.003G135200.1	405	HSF_DNA-bind	73	162	A9	5.8e-198	yes	yes	yes	70-162	180-230	61-247	353-362	377-385		173	262
	Phaseolus_vulgaris	Phvul.003G283300.1	475	HSF_DNA-bind	28	117	A1	1.3e-228	yes	yes	yes	25-118	142-206	224-234		460-467		142	255
	Phaseolus_vulgaris	Phvul.009G065800.1	365	HSF_DNA-bind	25	114	B4	9.8e-204	yes	yes	yes	22-115	190-226	330-333		347-359	320-326	171	223
	Phaseolus_vulgaris	Phvul.008G202500.1	270	HSF_DNA-bind	26	115	B4	1.4e-128	yes	yes	yes	23-116	161-197	260-263			250-256	154	191
	Phaseolus_vulgaris	Phvul.001G037000.1	374	HSF_DNA-bind	45	134	A2	8.3e-207	yes	yes	yes	42-135	150-214	231-244	281-289/ 313-320/353-361	362-368		151	257
	Phaseolus_vulgaris	Phvul.003G244000.1	279	HSF_DNA-bind	10	99	B1	3.3e-131	yes	yes	yes	7-100	144-181	259-265			235-241	87	104
	Phaseolus_vulgaris	Phvul.006G171700.1	387	HSF_DNA-bind	15	104	A4	8.8e-206	yes	yes	yes	12-105	131-188	206-209	257-266/336-345			112	202
	Phaseolus_vulgaris	Phvul.002G322700.1	361	HSF_DNA-bind	15	104	A8	7.6e-210	yes	yes	yes	13-120	149-206	313-321	299-308			92	103
	Phaseolus_vulgaris	Phvul.001G022900.1	340	HSF_DNA-bind	25	114	B4	1.9e-199	yes	yes	yes	22-115	184-220	298-301		319-332	288-294	171	216
	Phaseolus_vulgaris	Phvul.003G135400.1	405	HSF_DNA-bind	73	162	A9	3.9e-198	yes	yes	yes	70-162	180-230	61-247	353-362	377-385		174	262
	Phaseolus_vulgaris	Phvul.007G174800.1	358	HSF_DNA-bind	44	133	A6/A7	2.7e-176	yes	yes	yes	41-134	160-210		313-321	275-285		137	256
	Phaseolus_vulgaris	Phvul.001G154700.1	367	HSF_DNA-bind	49	138	A6	4.5e-170	yes	yes	yes	46-139	154-218	233-247	322-331	351-361		154	252
	Phaseolus_vulgaris	Phvul.009G078300.1	374	HSF_DNA-bind	46	135	A2	1.2e-197	yes	yes	yes	43-136	152-216	230-243	274-282/313-320/353-361	362-368		153	246
	Phaseolus_vulgaris	Phvul.002G228400.1	207	HSF_DNA-bind	36	128	B5	3.6e-134	yes	yes	yes	33-129	159-199	201-204
	Phaseolus_vulgaris	Phvul.007G278200.1	335	HSF_DNA-bind	37	126	A6	5.3e-172	yes	yes	yes	34-127	147-203	218-232	294-303	320-330		135	327
	Phaseolus_vulgaris	Phvul.006G034200.1	488	HSF_DNA-bind	21	110	A5	0e	yes	yes	yes	18-111	131-188	199-214	435-444	475-482		123	215
	Phaseolus_vulgaris	Phvul.002G040500.1	466	HSF_DNA-bind	15	104	A1	5.1e-210	yes	yes	yes	12-105	127-191	209-219	400-409	454-461		125	262
	Phaseolus_vulgaris	Phvul.002G242000.1	404	HSF_DNA-bind	15	104	A4	0e	yes	yes	yes	12-105	129-186	204-207	255-264/339-348	390-397		97	193
	Phaseolus_vulgaris	Phvul.007G061800.1	354	HSF_DNA-bind	45	134	A6	4.7e-161	yes	yes	yes	42-135	151-215	230-244	319-328	338-348		152	247
	Phaseolus_vulgaris	Phvul.007G223400.1	453	HSF_DNA-bind	23	112	A3	2.3e-184	yes	yes	yes	21-114	170-206	249-253			240-246	98	238
	Phaseolus_vulgaris	Phvul.001G131000.1	233	HSF_DNA-bind	22	111	B3	7.6e-175	yes	yes	yes	19-112	149-184	215-216			198-204	133	199
	Phaseolus_vulgaris	Phvul.001G266300.1	442	HSF_DNA-bind	15	104	-	-	yes	no	yes	12-105	151-181	192-207	389-398	429-436		113	197
	Phaseolus_vulgaris	Phvul.007G251900.1	224	HSF_DNA-bind	42	131	B3	1.6e-99	yes	yes	yes	39-132	162-197				210-216	113	209
	Phaseolus_vulgaris	Phvul.004G163300.1	318	HSF_DNA-bind	17	106	C1	1.4e-169	yes	yes	yes	14-108	133-176	196-201				114	203
	Populus_trichocarpa	Potri.012G138900.1	302	HSF_DNA-bind	30	119	B2	6.9e-136	yes	yes	yes	27-120	161-197	232-236			223-229	156	207
	Populus_trichocarpa	Potri.007G043800.1	286	HSF_DNA-bind	10	99	B1	1.7e-146	yes	yes	yes	7-100	154-191				251-257	83	103
	Populus_trichocarpa	Potri.001G108100.1	344	HSF_DNA-bind	40	129	B2	2.7e-180	yes	yes	yes	37-130	197-233	293-297			284-290	192	234
	Populus_trichocarpa	Potri.015G141100.1	287	HSF_DNA-bind	35	124	B2	3.8e-116	yes	yes	yes	32-125	170-206	243-247			234-240	165	234
	Populus_trichocarpa	Potri.001G138900.1	596	HSF_DNA-bind	122	211	A1	1.7e-234	yes	yes	yes	119-212	236-300	318-328	535-544	581-588		236	339
	Populus_trichocarpa	Potri.008G157600.1	349	HSF_DNA-bind	21	110	A6	8.8e-206	yes	yes	yes	18-111	122-186	201-215	301-310	330-340		123	228
	Populus_trichocarpa	Potri.001G273700.1	271	HSF_DNA-bind	25	114	B4	9.4e-138	yes	yes	yes	22-115	158-194	262-265			252-258	146	188
	Populus_trichocarpa	Potri.014G027100.1	369	HSF_DNA-bind	25	114	B4	8.3e-202	yes	yes	yes	22-115	198-234	331-334		351-363	321-327	190	228
	Populus_trichocarpa	Potri.002G124800.1	365	HSF_DNA-bind	25	114	B4	4.8e-198	yes	yes	yes	22-115	193-229	327-330		347-359	317-323	184	225
	Populus_trichocarpa	Potri.009G068000.1	273	HSF_DNA-bind	25	114	B4	7.3e-130	yes	yes	yes	22-115	161-197	264-267			254-260	153	191
	Populus_trichocarpa	Potri.002G048200.1	360	HSF_DNA-bind	46	135	A6	1.7e-173	yes	yes	yes	43-136	152-216	231-245	322-331	341-351		125	249
	Populus_trichocarpa	Potri.016G056500.1	229	HSF_DNA-bind	19	108	B3	2.6e-172	yes	yes	yes	16-109	146-181	211-212			194-200	124	227
	Populus_trichocarpa	Potri.006G115700.1	445	HSF_DNA-bind	16	105	A3	5.8e-227	yes	yes	yes	13-106	135-181	207-216	364-370/383-388/403-412/420-426			118	204
	Populus_trichocarpa	Potri.003G095000.1	508	HSF_DNA-bind	37	126	A1	5.5e-235	yes	yes	yes	34-127	151-215	233-243	448-457	494-501		148	254
	Populus_trichocarpa	Potri.014G141400.1	444	HSF_DNA-bind	15	104	A4	1.4e-170	yes	yes	yes	12-105	129-186	204-207	252-261/377-386	430-437		118	211
	Populus_trichocarpa	Potri.011G071700.1	407	HSF_DNA-bind	14	103	A4	1.8e-282	yes	yes	yes	11-104	130-187	205-208	257-266/342-351	93-400		111	186
	Populus_trichocarpa	Potri.010G082000.1	359	HSF_DNA-bind	44	133	A6	4.5e-225	yes	yes	yes	41-134	149-213	228-242	322-331	343-353		140	255
	Populus_trichocarpa	Potri.005G214800.1	360	HSF_DNA-bind	46	135	A6	6.2e-189	yes	yes	yes	43-136	152-216	231-245	326-335	344-354		152	253
	Populus_trichocarpa	Potri.004G042600.1	210	HSF_DNA-bind	33	131	B5	8.5e-134	yes	yes	yes	30-132	162-202	204-207				139	208
	Populus_trichocarpa	Potri.010G104300.1	393	HSF_DNA-bind	12	101	A8	5.9e-214	yes	yes	yes	10-117	146-203	311-319	297-306			110	206
	Populus_trichocarpa	Potri.017G059600.1	486	HSF_DNA-bind	18	107	A5	1.7e-277	yes	yes	yes	15-108	128-185	196-211	433-442	473-480		115	201
	Populus_trichocarpa	Potri.001G320900.1	491	HSF_DNA-bind	23	112	A5	5.6e-270	yes	yes	yes	20-113	133-190	201-216	439-448	479-486		124	217
	Populus_trichocarpa	Potri.011G051600.1	212	HSF_DNA-bind	32	131	B5	2.4e-162	yes	yes	yes	29-132	163-203	206-209				140	209
	Populus_trichocarpa	Potri.006G049200.1	227	HSF_DNA-bind	19	108	B3	2.1e-163	yes	yes	yes	16-109	147-182	212-213			195-201	99	109
	Populus_trichocarpa	Potri.006G226800.1	389	HSF_DNA-bind	44	133	A2	1.6e-264	yes	yes	yes	41-134	149-213	229-242	282-290/318-325/357-365	366-372		149	243
	Populus_trichocarpa	Potri.004G062300.1	408	HSF_DNA-bind	14	103	A4	0e	yes	yes	yes	11-104	130-187	205-208	258-267/343-352	394-401		111	186
	Populus_trichocarpa	Potri.008G136800.2	394	HSF_DNA-bind	12	101	A8	4.3e-181	yes	yes	yes	10-117	146-203	312-320	298-307			92	198
	Populus_trichocarpa	Potri.006G148200.1	431	HSF_DNA-bind	82	171	A9	2.3e-283	yes	yes	yes	79-171	193-243	70-260	367-376	395-403		2	43
	Populus_trichocarpa	Potri.013G079800.1	500	HSF_DNA-bind	17	106	A1	7.2e-239	yes	yes	yes	39-132	156-220	238-248		496-503		124	229
	Populus_trichocarpa	Potri.T137400.1	340	HSF_DNA-bind	14	103	C1	5.9e-174	yes	yes	yes	11-105	129-172	193-198				115	199
	Prunus_persica	Prupe.5G031100.1.p	517	HSF_DNA-bind	41	130	A1	6.6e-215	yes	yes	yes	38-131	154-218	236-246		502-509		150	254
	Prunus_persica	Prupe.2G292100.1.p	304	HSF_DNA-bind	27	116	B2	4.6e-179	yes	yes	yes	24-117	167-203	248-252			239-245	158	206
	Prunus_persica	Prupe.8G234900.1.p	360	HSF_DNA-bind	44	133	A6	5.6e-190	yes	yes	yes	41-134	150-214	229-243	316-325	344-354		151	248
	Prunus_persica	Prupe.7G133600.1.p	300	HSF_DNA-bind	10	99	B1	3.6e-147	yes	yes	yes	7-100	154-191				245-251	89	98
	Prunus_persica	Prupe.5G093200.1.p	332	HSF_DNA-bind	32	121	B2	1.5e-177	yes	yes	yes	29-122	185-221	290-294			281-287	179	224
	Prunus_persica	Prupe.1G021200.1.p	356	HSF_DNA-bind	34	123	A6	6.9e-179	yes	yes	yes	31-124	140-204	219-233	313-322	340-350		140	238
	Prunus_persica	Prupe.1G433500.1.p	390	HSF_DNA-bind	25	114	B4	6.2e-183	yes	yes	yes	22-115	204-240	348-351		372-384	338-344	188	234
	Prunus_persica	Prupe.7G056700.1.p	245	HSF_DNA-bind	22	111	B3	1e-159	yes	yes	yes	19-112	158-193	227-228			210-216	121	243
	Prunus_persica	Prupe.4G068100.1.p	408	HSF_DNA-bind	14	103	A4	1.6e-244	yes	yes	yes	11-104	131-188	206-209	250-259/343-352	394-401		110	192
	Prunus_persica	Prupe.3G108700.1.p	438	HSF_DNA-bind	14	103	A4	5.1e-173	yes	yes	yes	11-104	129-186	204-207	252-261/376-385	228-235		116	209
	Prunus_persica	Prupe.7G117200.1.p	536	HSF_DNA-bind	105	194	A3	3.8e-229	yes	yes	yes	102-195	220-266	292-301	449-455/ 468-473/488-497/505-511			204	287
	Prunus_persica	Prupe.7G206900.1.p	486	HSF_DNA-bind	146	235	A9	1.2e-154	yes	yes	yes	143-235	254-304	134-321	427-436	452-460		33	66
	Prunus_persica	Prupe.4G144200.1.p	504	HSF_DNA-bind	21	110	A1	9e-238	yes	yes	yes	18-111	134-198	216-226	439-448	489-496		132	240
	Prunus_persica	Prupe.1G410400.1.p	375	HSF_DNA-bind	42	131	A2	5.2e-224	yes	yes	yes	39-132	148-212	228-241	280-288/312-319/353-361	362-368		149	244
	Prunus_persica	Prupe.1G165500.1.p	484	HSF_DNA-bind	16	105	A5	0e	yes	yes	yes	13-106	126-183	?194-209	431-440	471-478		116	199
	Prunus_persica	Prupe.1G335100.1.p	409	HSF_DNA-bind	21	110	A8	7.4e-210	yes	yes	yes	19-126	155-212	321-329	307-316			135	203
	Prunus_persica	Prupe.7G231100.1.p	334	HSF_DNA-bind	13	102	C1	1.9e-182	yes	yes	yes	10-104	134-177	200-205				120	203
	Prunus_persica	Prupe.4G046000.1.p	197	HSF_DNA-bind	19	115	B5	2.3e-71	yes	yes	yes	16-115	150-190
	Ricinus_communis	30190.m011156	337	HSF_DNA-bind	34	123	B2	2.3e-190	yes	yes	yes	31-124	189-225	284-288			275-281	184	229
	Ricinus_communis	30054.m000802	510	HSF_DNA-bind	42	131	A1	7.4e-239	yes	yes	yes	11-104	126-190	206-216		490-497		156	256
	Ricinus_communis	30147.m014282	323	HSF_DNA-bind	25	114	B2	1.5e-200	yes	yes	yes	22-115	178-214	258-262			249-255	173	216
	Ricinus_communis	28312.m000133	191	HSF_DNA-bind	25	114	-	-	yes	no	no	22-115		179-182			169-175
	Ricinus_communis	29844.m003222	359	HSF_DNA-bind	40	129	A6	9.4e-202	yes	yes	yes	18-111	127-191	206-220	301-310	329-339		146	238
	Ricinus_communis	29883.m001955	360	HSF_DNA-bind	47	136	A6	1.5e-178	yes	yes	yes	44-137	160-224	239-253	325-334	344-354		145	258
	Ricinus_communis	30170.m013859	362	HSF_DNA-bind	25	114	B4	6.9e-192	yes	yes	yes	22-115	197-233	324-327		345-357	314-320	188	229
	Ricinus_communis	29636.m000750	464	HSF_DNA-bind	47	136	A4	2.9e-211	yes	yes	yes	44-137	161-218	236-239	285-294/ 404-413	451-458		144	237
	Ricinus_communis	30026.m001484	402	HSF_DNA-bind	14	103	A4	0e	yes	yes	yes	11-104	?130-187	206-209	253-262/338-347	?389-396		112	202
	Ricinus_communis	30006.m000287	248	HSF_DNA-bind	23	112	B3	4.2e-212	yes	yes	yes	20-113	158-193	231-232			214-220	135	211
	Ricinus_communis	29629.m001435	491	HSF_DNA-bind	21	110	A5	0e	yes	yes	yes	18-111	131-188	199-214	439-448	479-486		122	216
	Ricinus_communis	29912.m005397	478	HSF_DNA-bind	139	228	A9	1.3e-270	yes	yes	yes	136-228	250-300	127-317	421-430	449-457		74	114
	Ricinus_communis	29739.m003565	371	HSF_DNA-bind	36	125	A2	4.2e-224	yes	yes	yes	33-126	141-205	221-234	275-283/311-318/351-359	360-366		141	224
	Ricinus_communis	29968.m000635	409	HSF_DNA-bind	16	105	A8	6.5e-249	yes	yes	yes	14-121	150-207	325-333	311-320	250-260		103	194
	Ricinus_communis	29851.m002407	218	HSF_DNA-bind	29	139	B5	1.6e-161	yes	yes	yes	26-140	171-211	213-216				150	217
	Ricinus_communis	29912.m005526	337	HSF_DNA-bind	13	102	C1	5.2e-227	yes	yes	yes	10-104	119-162	184-189				100	190
	Ricinus_communis	29092.m000454	521	HSF_DNA-bind	84	177	A3	0e	yes	yes	yes	81-178	207-253	277-286	435-441/454-459/474-483/491-497			192	275
	Ricinus_communis	30073.m002276	84	HSF_DNA-bind	9	67	-	-	yes	no	no	6-67
	Ricinus_communis	30073.m002275	494	HSF_DNA-bind	17	103	A1	6.8e-138	yes	yes	yes	10-103	124-188	206-216	432-441	481-488		117	214
	salix_purpurea	SapurV1A.1070s0140.1.p	301	HSF_DNA-bind	30	119	B2	1.1e-126	yes	yes	yes	27-120	164-200	235-239			226-232	159	223
	salix_purpurea	SapurV1A.0376s0080.1.p	357	HSF_DNA-bind	46	135	A6	5.8e-191	yes	yes	yes	43-136	152-216	231-245	322-331	341-351		152	250
	salix_purpurea	SapurV1A.0068s0200.1.p	278	HSF_DNA-bind	35	124	B2	1.5e-110	yes	yes	yes	32-125	170-206	239-243			230-236	151	225
	salix_purpurea	SapurV1A.0852s0050.1.p	509	HSF_DNA-bind	37	126	A1	8.7e-235	yes	yes	yes	34-127	151-215	233-243	448-457	494-501		151	256
	salix_purpurea	SapurV1A.0507s0120.1.p	353	HSF_DNA-bind	40	129	B2	9.4e-177	yes	yes	yes	37-130	197-233	294-298			285-291	192	234
	salix_purpurea	SapurV1A.3395s0010.1.p	359	HSF_DNA-bind	46	135	A6	1.1e-188	yes	yes	yes	43-136	152-216	231-245	324-333	343-353		152	250
	salix_purpurea	SapurV1A.0423s0030.1.p	370	HSF_DNA-bind	25	114	B4	4.2e-206	yes	yes	yes	22-115	199-235	332-335		352-364	322-328	192	229
	salix_purpurea	SapurV1A.0167s0090.1.p	365	HSF_DNA-bind	25	114	B4	1e-179	yes	yes	yes	22-115	193-229	326-329		347-359	316-322	185	223
	salix_purpurea	SapurV1A.3263s0010.1.p	272	HSF_DNA-bind	26	115	B4	5.9e-131	yes	yes	yes	23-116	159-195	263-266			253-259	151	188
	salix_purpurea	SapurV1A.0253s0300.1.p	272	HSF_DNA-bind	26	115	B4	6.5e-131	yes	yes	yes	23-116	159-195	263-266			253-259	151	188
	salix_purpurea	SapurV1A.0350s0180.1.p	345	HSF_DNA-bind	21	110	A6	1.1e-203	yes	yes	yes	44-137	161-225	243-253		456-463		127	231
	salix_purpurea	SapurV1A.0208s0230.1.p	442	HSF_DNA-bind	16	105	A3	5.4e-219	yes	yes	yes	13-106	135-181	207-216	361-367/380-385/400-409/417-423			118	223
	salix_purpurea	SapurV1A.0238s0150.1.p	363	HSF_DNA-bind	44	133	A6	1.1e-199	yes	yes	yes	41-134	152-253		319-328	347-357		120	244
	salix_purpurea	SapurV1A.3703s0010.1.p	363	HSF_DNA-bind	44	133	A6	1.6e-200	yes	yes	yes	41-134	152-253		319-328	347-357		120	244
	salix_purpurea	SapurV1A.0508s0260.1.p	272	HSF_DNA-bind	25	114	B4	2.1e-128	yes	yes	yes	22-115	158-194	263-266			253-259	150	189
	salix_purpurea	SapurV1A.0037s0020.1.p	229	HSF_DNA-bind	19	108	B3	2.6e-164	yes	yes	yes	16-109	146-181	211-212			194-200
	salix_purpurea	SapurV1A.0053s0820.1.p	446	HSF_DNA-bind	16	105	A4	3.7e-161	yes	yes	yes	13-106	130-187		254-263/379-388	432-439		121	226
	salix_purpurea	SapurV1A.3823s0010.1.p	508	HSF_DNA-bind	37	126	A1	7.5e-231	yes	yes	yes	34-127	151-215	233-243		494-501		148	256
	salix_purpurea	SapurV1A.0623s0030.1.p	276	HSF_DNA-bind	10	99	B1	2e-137	yes	yes	yes	7-100	151-188				241-247	137	198
	salix_purpurea	SapurV1A.3173s0010.1.p	276	HSF_DNA-bind	10	99	B1	1.2e-139	yes	yes	yes	7-100	151-188				241-247	137	198
	salix_purpurea	SapurV1A.0151s0340.1.p	508	HSF_DNA-bind	37	126	A1	5.8e-227	yes	yes	yes	34-127	151-215	233-243		494-501		148	256
	salix_purpurea	SapurV1A.1190s0030.1.p	483	HSF_DNA-bind	18	107	A5	2.1e-267	yes	yes	yes	15-108	128-185	196-211	430-439	470-477		120	200
	salix_purpurea	SapurV1A.0108s0230.1.p	427	HSF_DNA-bind	83	172	A9	9.2e-243	yes	yes	yes	80-172	194-244	71-261	365-374	393-401		2	43
	salix_purpurea	SapurV1A.0032s0100.1.p	204	HSF_DNA-bind	32	132	B5	1.2e-126	yes	yes	yes	29-133	164-204					141	201
	salix_purpurea	SapurV1A.0055s0270.1.p	392	HSF_DNA-bind	12	101	A8	6.1e-209	yes	yes	yes	10-117	146-203	311-319	297-306			89	203
	salix_purpurea	SapurV1A.0086s0550.1.p	386	HSF_DNA-bind	44	133	A2	6.1e-243	yes	yes	yes	41-134	149-213	229-242	280-288/315-322/354-362			147	233
	salix_purpurea	SapurV1A.0228s0170.1.p	228	HSF_DNA-bind	19	108	B3	6.3e-145	yes	yes	yes	16-109	145-180	210-211			193-199
	salix_purpurea	SapurV1A.0006s1530.1.p	343	HSF_DNA-bind	46	135	A6/A7	3.2e-131	yes	yes	yes	43-136	173-198		304-312	266-276		126	233
	salix_purpurea	SapurV1A.0058s0140.1.p	487	HSF_DNA-bind	22	111	A5	4.4e-246	yes	yes	yes	19-112	132-189	200-215	435-444	475-482		123	209
	salix_purpurea	SapurV1A.0181s0030.1.p	407	HSF_DNA-bind	14	103	A4	1.5e-267	yes	yes	yes	11-104	130-187	205-208	257-266/342-351	393-400		106	188
	salix_purpurea	SapurV1A.0029s0230.1.p	408	HSF_DNA-bind	14	103	A4	1.5e-278	yes	yes	yes	11-104	130-187	205-208	258-267/343-352	394-401		111	187
	salix_purpurea	SapurV1A.3884s0010.1.p	408	HSF_DNA-bind	14	103	A4	1.5e-278	yes	yes	yes	11-104	130-187	205-208	258-267/ 343-352	394-401		111	187
	salix_purpurea	SapurV1A.0015s0620.1.p	403	HSF_DNA-bind	12	101	A8	9.7e-181	yes	yes	yes	10-117	146-203	312-320	298-307			126	198
	salix_purpurea	SapurV1A.3168s0020.1.p	210	HSF_DNA-bind	33	131	B5	4.1e-134	yes	yes	yes	30-132	162-202	204-207				140	208
	salix_purpurea	SapurV1A.0558s0090.1.p	333	HSF_DNA-bind	10	99	C1	2.5e-158	yes	yes	yes	7-101	124-167	188-193				117	194
	salix_purpurea	SapurV1A.0182s0110.1.p	497	HSF_DNA-bind	14	103	A1	4e-236	yes	yes	yes	11-104	123-187	205-215	431-440	482-489		122	224
	salix_purpurea	SapurV1A.0012s0230.1.p	210	HSF_DNA-bind	33	131	B5	3e-130	yes	yes	yes	30-132	162-202	204-207				140	208
	Theobroma_cacao	Thecc1EG000610t1	300	HSF_DNA-bind	10	99	B1	6.1e-188	yes	yes	yes	7-100	154-191	214-220			251-257	86	98
	Theobroma_cacao	Thecc1EG016563t1	529	HSF_DNA-bind	45	134	A1	2.5e-227	yes	yes	yes	42-135	159-223	241-251		514-521		159	267
	Theobroma_cacao	Thecc1EG015119t1	324	HSF_DNA-bind	29	118	B2	3.1e-182	yes	yes	yes	26-119	175-211	254-258			245-251	166	218
	Theobroma_cacao	Thecc1EG040889t1	280	HSF_DNA-bind	25	114	B4	5.8e-130	yes	yes	yes	22-115	158-194	259-262			249-255	149	187
	Theobroma_cacao	Thecc1EG033816t1	362	HSF_DNA-bind	25	114	B4	5.1e-205	yes	yes	yes	22-115	197-233	326-329		344-356	316-322	187	227
	Theobroma_cacao	Thecc1EG016198t1	315	HSF_DNA-bind	28	117	B2	2.7e-195	yes	yes	yes	25-118	172-208	266-270			257-263	167	213
	Theobroma_cacao	Thecc1EG004275t1	363	HSF_DNA-bind	43	132	A6	6.5e-189	yes	yes	yes	40-133	149-213	228-242	319-328	347-357		150	247
	Theobroma_cacao	Thecc1EG024565t1	234	HSF_DNA-bind	24	113	B3	6.4e-173	yes	yes	yes	21-114	151-186	216-217			199-205
	Theobroma_cacao	Thecc1EG029630t1	406	HSF_DNA-bind	14	103	A4	5.6e-265	yes	yes	yes	11-104	130-187	205-208	254-263/341-350	392-399		118	204
	Theobroma_cacao	Thecc1EG025482t1	501	HSF_DNA-bind	25	114	A1	3.2e-259	yes	yes	yes	22-115	136-200	218-228	435-444	486-493		136	240
	Theobroma_cacao	Thecc1EG011279t1	421	HSF_DNA-bind	35	124	A8	9e-217	yes	yes	yes	33-140	174-231	334-342	320-329			122	139
	Theobroma_cacao	Thecc1EG020222t1	491	HSF_DNA-bind	21	110	A5	0e	yes	yes	yes	18-111	131-188	199-214	438-447	478-485		122	216
	Theobroma_cacao	Thecc1EG037308t1	392	HSF_DNA-bind	58	147	A2	6.8e-238	yes	yes	yes	55-148	163-227	239-252	296-304/331-338/371-379	380-386		139	309
	Theobroma_cacao	Thecc1EG020700t1	361	HSF_DNA-bind	41	130	A6	1.4e-195	yes	yes	yes	38-131	146-210	225-239	317-326	345-355		147	257
	Theobroma_cacao	Thecc1EG022446t1	477	HSF_DNA-bind	60	149	A3	1.6e-213	yes	yes	yes	57-150	179-225	251-260	405-411/424-429			162	245
	Theobroma_cacao	Thecc1EG037888t1	341	HSF_DNA-bind	13	102	C1	1e-196	yes	yes	yes	10-104	122-165	187-192				89	197
	Theobroma_cacao	Thecc1EG001784t1	448	HSF_DNA-bind	14	103	A4	3.6e-176	yes	yes	yes	11-104	129-186	204-207	253-262/383-392	434-441		110	189
	Theobroma_cacao	Thecc1EG037635t1	471	HSF_DNA-bind	131	220	A9	5.1e-185	yes	yes	yes	128-220	242-292	119-309	413-422	441-449		23	33
	Theobroma_cacao	Thecc1EG029886t1	680	HSF_DNA-bind	41	144	B5	2.3e-43	yes	yes	yes	16-117	174-214					150	268
	Vitis_vinifera	GSVIVT01019829001	307	HSF_DNA-bind	25	114	B2	4e-205	yes	yes	yes	22-115	160-196	246-250			237-243	144	201
	Vitis_vinifera	GSVIVT01022134001	287	HSF_DNA-bind	10	99	B1	1.6e-167	yes	yes	yes	7-100	156-193				242-248	94	96
	Vitis_vinifera	GSVIVT01009477001	282	HSF_DNA-bind	25	114	B4	1e-179	yes	yes	yes	22-115	132-168	244-247		264-276	234-240	133	161
	Vitis_vinifera	GSVIVT01010595001	297	HSF_DNA-bind	21	110	B2	1.1e-155	yes	yes	yes	18-111	153-189	234-238			225-231	143	189
	Vitis_vinifera	GSVIVT01021269001	355	HSF_DNA-bind	14	103	A4	6.5e-231	yes	yes	yes	11-104	131-188	206-209	254-263/291-300	341-348		121	196
	Vitis_vinifera	GSVIVT01033257001	131	HSF_DNA-bind	22	111	-	-	yes	no	no	19-112						99	127
	Vitis_vinifera	GSVIVT01011632001	272	HSF_DNA-bind	14	103	A8	2.5e-192	yes	yes	yes	12-119	148-205					94	225
	Vitis_vinifera	GSVIVT01002066001	201	HSF_DNA-bind	23	119	B5	1.9e-150	yes	yes	yes	20-120	150-190	195-198				129	186
	Vitis_vinifera	GSVIVT01003118001	362	HSF_DNA-bind	80	169	A6	1.2e-166	yes	yes	yes	77-170	182-238	253-267	317-326	346-356		179	304
	Vitis_vinifera	GSVIVT01018041001	169	HSF_DNA-bind	12	101	-	-	yes	no	no	9-102
	Vitis_vinifera	GSVIVT01037333001	286	HSF_DNA-bind	25	114	B4	1.8e-175	yes	yes	yes	22-115	161-197	269-272			259-265	153	190
	Vitis_vinifera	GSVIVT01033781001	494	HSF_DNA-bind	100	189	A3	0e	yes	yes	yes	97-190	?219-265	291-300	407-413/426-431/446-455/463-469			73	83
	Vitis_vinifera	GSVIVT01015183001	664	HSF_DNA-bind	417	506	A9	3.1e-193	yes	yes	yes	124-452	527-577	405-594				309	383
	Vitis_vinifera	GSVIVT01015389001	330	HSF_DNA-bind	12	101	C1	2.4e-224	yes	yes	yes	9-103	124-167	188-193				110	200
	Vitis_vinifera	GSVIVT01024378001	98	HSF_DNA-bind	2	83	-	-	yes	no	no	17-84
	Vitis_vinifera	GSVIVT01020781001	349	HSF_DNA-bind	2	83	-	-	no	yes	yes		108-165		210-219/284-293	335-342		98	215
	Vitis_vinifera	GSVIVT01035385001	300	HSF_DNA-bind	20	87	A2	1.2e-173	yes	yes	yes	17-88	103-167	180-193	224-231/268-276	277-283		104	205
	Vitis_vinifera	GSVIVT01021040001	3443	HSF_DNA-bind	21	80	A5	3e-212	yes	yes	yes	18-111	3171-3227	3238-3253	3390-3399	3430-3437		80	3059
	Vitis_vinifera	GSVIVT01013107001	89	HSF_DNA-bind	1	69	-	-	yes	no	no	18-84
Monocots	Brachypodium_distachyon	Bradi1g55630.2.p	458	HSF_DNA-bind	55	144	A2	2e-154	yes	yes	yes	52-145	162-226	242-256	414-421	444-448		166	264
	Brachypodium_distachyon	Bradi4g35780.3.p	400	HSF_DNA-bind	44	133	B2	1.2e-163	yes	yes	yes	41-134	217-253	322-326			313-319	211	257
	Brachypodium_distachyon	Bradi2g18980.2.p	365	HSF_DNA-bind	17	106	A4	4.4e-168	yes	yes	yes	14-107	130-187	207-210	260-269			115	201
	Brachypodium_distachyon	Bradi3g26920.4.p	357	HSF_DNA-bind	40	129	A6	3.4e-178	yes	yes	yes	37-130	147-211	226-240	312-321	340-350		138	244
	Brachypodium_distachyon	Bradi1g05550.1.p	348	HSF_DNA-bind	36	125	A2	1.8e-158	yes	yes	yes	33-126	141-205	221-235	311-318			141	254
	Brachypodium_distachyon	Bradi1g19900.1.p	314	HSF_DNA-bind	36	125	B4	1.9e-154	yes	yes	yes	33-126	201-237					195	234
	Brachypodium_distachyon	Bradi3g44700.1.p	482	HSF_DNA-bind	73	162	A3	4.1e-176	yes	yes	yes	70-163	199-245					191	274
	Brachypodium_distachyon	Bradi1g01130.1.p	622	HSF_DNA-bind	48	137	A1	1.8e-252	yes	yes	yes	45-138	169-233	251-261	468-477	512-519		142	163
	Brachypodium_distachyon	Bradi1g61620.1.p	301	HSF_DNA-bind	33	122	B4	4.9e-137	yes	yes	yes	30-123	183-219	274-277			264-270	156	217
	Brachypodium_distachyon	Bradi1g69407.1.p	394	HSF_DNA-bind	52	141	A8	9.9e-103	yes	yes	yes	50-157	189-246					131	155
	Brachypodium_distachyon	Bradi2g49860.1.p	439	HSF_DNA-bind	13	102	A4	4.1e-209	yes	yes	yes	10-103	126-183	201-204	247-256/375-384	425-432		117	195
	Brachypodium_distachyon	Bradi4g32050.1.p	405	HSF_DNA-bind	27	117	B4	8.1e-149	yes	yes	yes	24-118	218-254	52-355		378-385	342-348	202	251
	Brachypodium_distachyon	Bradi1g08891.1.p	386	HSF_DNA-bind	55	144	A2	4.2e-141	yes	yes	yes	52-145	166-230	260-274	325-332			154	246
	Brachypodium_distachyon	Bradi3g42130.1.p	346	HSF_DNA-bind	18	107	B2	2.2e-137	yes	yes	yes	15-108	177-213	280-284			271-277	173	216
	Brachypodium_distachyon	Bradi5g18680.1.p	285	HSF_DNA-bind	11	100	B2	3.8e-81	yes	yes	yes	8-101	156-192	221-225			212-218	145	201
	Brachypodium_distachyon	Bradi1g74350.2.p	341	HSF_DNA-bind	40	129	A6	3.6e-151	yes	yes	yes	37-130	147-211	230-237	310-319			147	242
	Brachypodium_distachyon	Bradi3g43710.1.p	469	HSF_DNA-bind	21	111	A5	9.6e-187	yes	yes	yes	18-112	132-189	200-215	417-426	457-464		124	206
	Brachypodium_distachyon	Bradi2g41530.1.p	381	HSF_DNA-bind	74	163	A6/A7	3.2e-133	yes	yes	yes	71-164	194-244		327-335			36	60
	Brachypodium_distachyon	Bradi4g32130.1.p	303	HSF_DNA-bind	29	118	B1	4.4e-107	yes	yes	yes	26-119	117-214				253-259	172	268
	Brachypodium_distachyon	Bradi3g08870.1.p	315	HSF_DNA-bind	17	106	C2	7.8e-161	yes	yes	yes	14-108	136-179	224-227				129	198
	Brachypodium_distachyon	Bradi2g44050.1.p	336	HSF_DNA-bind	21	110	C1	3.5e-95	yes	yes	yes	18-112	161-204					145	233
	Brachypodium_distachyon	Bradi2g48990.1.p	248	HSF_DNA-bind	25	114	C1	1.6e-101	yes	yes	yes	22-116	134-177					110	198
	Brachypodium_distachyon	Bradi1g37720.1.p	349	HSF_DNA-bind	49	138	A6/A7	3.4e-119	yes	yes	yes	48-139	167-217		290-298			151	231
	Brachypodium_distachyon	Bradi1g38140.2.p	265	HSF_DNA-bind	13	113	C2	1.2e-73	yes	yes	yes	10-104	137-180	207-210				118	191
	Hordeum_vulgare	MLOC_498.3	372	HSF_DNA-bind	56	145	A6	4.4e-169	yes	yes	yes	53-146	163-227	242-256	326-335	356-366		156	259
	Hordeum_vulgare	MLOC_75166.4	390	HSF_DNA-bind	48	137	B2	1.2e-161	yes	yes	yes	45-138	208-244	318-322			309-315	203	256
	Hordeum_vulgare	MLOC_69675.2	495	HSF_DNA-bind	83	172	A3	3.9e-213	yes	yes	yes	80-173	209-255	282-291				24	40
	Hordeum_vulgare	MLOC_21277.1	320	HSF_DNA-bind	12	101	A2	1.4e-157	yes	yes	yes	9-102	117-181	197-211	287-294			117	222
	Hordeum_vulgare	MLOC_70567.1	175	HSF_DNA-bind	41	130	-	-	yes	no	no	38-131
	Hordeum_vulgare	MLOC_75519.1	418	HSF_DNA-bind	44	133	A2	2.8e-190	yes	yes	yes	41-134	150-214	230-244	375-382	405-409		151	248
	Hordeum_vulgare	MLOC_11286.1	431	HSF_DNA-bind	15	104	A4	1e-183	yes	yes	yes	12-105	128-185	210-213	254-263/371-380	418-425		115	203
	Hordeum_vulgare	MLOC_73356.1	388	HSF_DNA-bind	26	116	B4	2.6e-152	yes	yes	yes	23-117	207-243	336-339		362-369	326-332	198	239
	Hordeum_vulgare	MLOC_65182.1	299	HSF_DNA-bind	13	102	B2	1.1e-81	yes	yes	yes	10-103	157-193	223-227			214-220	146	194
	Hordeum_vulgare	MLOC_6206.3	307	HSF_DNA-bind	12	101	A6	1.8e-154	yes	yes	yes	9-102	119-183	198-212	277-286			119	204
	Hordeum_vulgare	MLOC_51191.1	276	HSF_DNA-bind	66	155	A2	3.2e-120	yes	yes	yes	63-156	175-239	257-271				179	270
	Hordeum_vulgare	MLOC_74270.1	432	HSF_DNA-bind	13	102	A4	4.8e-186	yes	yes	yes	10-103	126-183	198-201	244-253/370-379	419-426		116	192
	Hordeum_vulgare	MLOC_73300.1	266	HSF_DNA-bind	15	104	C2	6.8e-133	yes	yes	yes	12-106	131-174	203-206				116	210
	Hordeum_vulgare	MLOC_57709.1	301	HSF_DNA-bind	30	119	B1	8.8e-112	yes	yes	yes	27-120	175-212				250-256	172	226
	Hordeum_vulgare	MLOC_68417.1	264	HSF_DNA-bind	14	103	C2	4e-136	yes	yes	yes	11-105	129-172	193-196				120	207
	Hordeum_vulgare	MLOC_63532.1	235	HSF_DNA-bind	19	108	C1	2.7e-105	yes	yes	yes	16-110	132-175					104	197
	Hordeum_vulgare	MLOC_11453.1	327	HSF_DNA-bind	25	114	C1	5e-104	yes	yes	yes	22-116	159-202					133	228
	Hordeum_vulgare	MLOC_67158.1	63	HSF_DNA-bind	12	63	-	-	yes	no	no	9-47
	Musa_acuminata	GSMUA_Achr8P20520_001	290	HSF_DNA-bind	40	129	-	-	yes	no	no	37-130		202-216	246-255	274-284		117	223
	Musa_acuminata	GSMUA_Achr4P17040_001	487	HSF_DNA-bind	39	128	A1	5e-216	yes	yes	yes	36-129	138-195	212-222	401-410	448-455		133	212
	Musa_acuminata	GSMUA_Achr4P04500_001	439	HSF_DNA-bind	31	120	A1	1.1e-222	yes	yes	yes	28-121	138-202	219-229	379-388	425-432		127	222
	Musa_acuminata	GSMUA_Achr1P03910_001	290	HSF_DNA-bind	30	119	B2	1.2e-99	yes	yes	yes	27-120	153-189	220-224			211-217	141	192
	Musa_acuminata	GSMUA_Achr4P29100_001	271	HSF_DNA-bind	31	120	B2	4.8e-109	yes	yes	yes	28-121	156-192	239-243			230-236	149	198
	Musa_acuminata	GSMUA_Achr4P19760_001	280	HSF_DNA-bind	30	119	B2	5.2e-137	yes	yes	yes	27-120	152-188	214-218			205-211	140	192
	Musa_acuminata	GSMUA_Achr11P10320_001	263	HSF_DNA-bind	21	110	B4	6.7e-113	yes	yes	yes	18-111	161-197	252-255			242-248	154	201
	Musa_acuminata	GSMUA_Achr8P27750_001	221	HSF_DNA-bind	14	103	A4	3.1e-87	yes	yes	yes	11-104	129-186					110	178
	Musa_acuminata	GSMUA_Achr5P07840_001	260	HSF_DNA-bind	25	114	B4	4.6e-122	yes	yes	yes	22-115	165-201	246-249			236-242	114	127
	Musa_acuminata	GSMUA_Achr9P00910_001	282	HSF_DNA-bind	24	113	B2	6.2e-116	yes	yes	yes	25-119	141-184					127	193
	Musa_acuminata	GSMUA_Achr3P27600_001	426	HSF_DNA-bind	34	123	A1	4e-182	yes	yes	yes	31-124	132-189	206-216	367-376	413-420		123	209
	Musa_acuminata	GSMUA_Achr5P03000_001	334	HSF_DNA-bind	44	133	A6	2.5e-159	yes	yes	yes	41-134	150-214	229-243	290-299	318-328		148	300
	Musa_acuminata	GSMUA_Achr2P21640_001	332	HSF_DNA-bind	16	105	A1	1.2e-100	yes	yes	yes	13-106	115-172	188-198				117	188
	Musa_acuminata	GSMUA_Achr3P06020_001	152	HSF_DNA-bind	29	118	-	-	yes	no	no	26-119
	Musa_acuminata	GSMUA_Achr1P16240_001	303	HSF_DNA-bind	34	123	B2	4.3e-125	yes	yes	yes	31-124	156-192	238-242			229-235	144	188
	Musa_acuminata	GSMUA_Achr1P07880_001	408	HSF_DNA-bind	137	226	B2	3.9e-117	yes	yes	yes	134-227	262-298	329-333			320-326	253	306
	Musa_acuminata	GSMUA_Achr6P31750_001	486	HSF_DNA-bind	14	103	-	-	yes	no	no	11-104		200-203	252-261/338-347			91	200
	Musa_acuminata	GSMUA_Achr2P11880_001	520	HSF_DNA-bind	37	127	B2	7.8e-113	yes	yes	yes	34-127	163-199	229-233			220-226	157	200
	Musa_acuminata	GSMUA_Achr10P25230_001	252	HSF_DNA-bind	23	113	B4	4.6e-129	yes	yes	yes	20-114	150-186			233-245		141	187
	Musa_acuminata	GSMUA_Achr3P15640_001	453	HSF_DNA-bind	16	105	A4	1e-191	yes	yes	yes	13-106	131-188	206-209	259-268/389-398	440-447		122	202
	Musa_acuminata	GSMUA_Achr7P13040_001	415	HSF_DNA-bind	132	222	-	-	yes	no	no	129-223				313-315
	Musa_acuminata	GSMUA_Achr6P00960_001	313	HSF_DNA-bind	36	125	A2	2.9e-107	yes	yes	yes	33-92	117-181	195-208	254-261/293-301	302-308		4	19
	Musa_acuminata	GSMUA_Achr6P27750_001	393	HSF_DNA-bind	12	101	A5	7.3e-157	yes	yes	yes	9-102	123-180	191-206	339-348	379-386		114	200
	Musa_acuminata	GSMUA_Achr9P01640_001	381	HSF_DNA-bind	18	107	A5	2.7e-147	yes	yes	yes	15-108	129-186	197-212	343-352			120	203
	Musa_acuminata	GSMUA_Achr6P24430_001	308	HSF_DNA-bind	42	131	-	-	yes	yes	no	39-132	148-154	204-218	263-272	292-302		146	287
	Musa_acuminata	GSMUA_Achr3P07020_001	321	HSF_DNA-bind	26	116	B4	8.5e-152	yes	yes	yes	23-117	143-179	266-269		290-302	256-262	135	176
	Musa_acuminata	GSMUA_Achr4P10060_001	263	HSF_DNA-bind	21	110	B4	1.1e-119	yes	yes	yes	18-111	145-181	227-230			217-223	139	175
	Musa_acuminata	GSMUA_Achr10P30120_001	303	HSF_DNA-bind	17	106	B1	2.7e-95	yes	yes	yes	14-107	159-196				240-246	149	197
	Musa_acuminata	GSMUA_Achr9P15370_001	312	HSF_DNA-bind	26	116	B4	2.2e-130	yes	yes	yes	23-117	158-194	276-279		298-305	266-272	149	195
	Musa_acuminata	GSMUA_Achr5P15900_001	547	HSF_DNA-bind	78	167	A3	2.1e-108	yes	yes	yes	75-168	197-243	269-278	500-509/517-523			165	262
	Musa_acuminata	GSMUA_Achr4P30990_001	289	HSF_DNA-bind	28	117	C2	3.3e-109	yes	yes	yes	25-119	141-184					118	185
	Musa_acuminata	GSMUA_Achr3P15740_001	276	HSF_DNA-bind	18	107	C1	1e-89	yes	yes	yes	15-109	134-177	199-204				125	210
	Musa_acuminata	GSMUA_Achr7P24790_001	209	HSF_DNA-bind	18	107	-	-	yes	no	no	15-109
	Musa_acuminata	GSMUA_Achr7P18900_001	219	HSF_DNA-bind	1	83	B4	1.1e-40	yes	yes	yes	18-84	133-169					123	186
	Musa_acuminata	GSMUA_Achr3P31860_001	324	HSF_DNA-bind	19	108	C1	5e-93	yes	yes	yes	16-110	142-185	210-215				125	218
	Musa_acuminata	GSMUA_Achr3P06990_001	225	HSF_DNA-bind	2	83	B4	4.3e-38	yes	yes	yes	18-84	136-172					130	179
	Musa_acuminata	GSMUA_Achr8P27820_001	363	HSF_DNA-bind	18	107	C1	9.9e-86	yes	yes	yes	15-109	131-174	195-200				122	207
	Musa_acuminata	GSMUA_Achr2P16660_001	273	HSF_DNA-bind	1	83	A2	5.2e-108	yes	yes	yes	13-50	77-141	155-168	216-223/253-261	262-268		62	162
	Musa_acuminata	GSMUA_Achr8P28330_001	327	HSF_DNA-bind	2	83	A5	3.4e-98	yes	yes	yes	13-84	105-162	173-188	315-324			96	183
	Musa_acuminata	GSMUA_Achr1P27200_001	333	HSF_DNA-bind	42	152	-	-	yes	no	no	39-153		226-240	288-295	323-327		161	243
	Musa_acuminata	GSMUA_Achr10P27810_001	305	HSF_DNA-bind	2	83	A6	8.6e-41	yes	yes	yes	17-84	95-151					70	153
	Musa_acuminata	GSMUA_Achr2P15590_001	220	HSF_DNA-bind	23	100	C2	.00022e	yes	yes	yes	8-102	114-157					96	148
	Musa_acuminata	GSMUA_Achr9P05660_001	96	HSF_DNA-bind	14	61	-	-	yes	no	no	13-33
	Oryza_sativa	LOC_Os09g35790.1	455	HSF_DNA-bind	39	128	B2	1.8e-155	yes	yes	yes	36-129	218-254	328-332			319-325	213	259
	Oryza_sativa	LOC_Os07g08140.1	373	HSF_DNA-bind	53	142	A2	7.5e-174	yes	yes	yes	50-143	159-223	239-253	328-335	359-363		159	260
	Oryza_sativa	LOC_Os02g32590.1	499	HSF_DNA-bind	68	157	A3	7e-181	yes	yes	yes	65-158	184-230	256-265				172	264
	Oryza_sativa	LOC_Os03g58160.1	358	HSF_DNA-bind	39	128	A2	2.2e-158	yes	yes	yes	36-129	144-208	224-238	224-238	344-348		142	241
	Oryza_sativa	LOC_Os08g43334.1	617	HSF_DNA-bind	192	281	B2	4.8e-165	yes	yes	yes	189-282	351-387	462-466			453-459	346	408
	Oryza_sativa	LOC_Os01g54550.1	441	HSF_DNA-bind	13	102	A4	1.6e-208	yes	yes	yes	10-103	126-183	201-204	247-256/375-384	427-434		117	196
	Oryza_sativa	LOC_Os10g28340.1	359	HSF_DNA-bind	43	132	A6	8.7e-181	yes	yes	yes	40-133	150-214	229-243	315-324	342-352		9	24
	Oryza_sativa	LOC_Os07g44690.1	311	HSF_DNA-bind	35	124	B4	4.5e-156	yes	yes	yes	32-125	189-225	292-295			282-288	183	222
	Oryza_sativa	LOC_Os04g48030.1	306	HSF_DNA-bind	11	100	B2	2e-105	yes	yes	yes	8-101	157-193	220-224			211-217	142	207
	Oryza_sativa	LOC_Os03g63750.1	507	HSF_DNA-bind	38	127	A1	2.7e-245	yes	yes	yes	35-128	150-214	232-242	449-458	493-500		150	282
	Oryza_sativa	LOC_Os03g25120.1	306	HSF_DNA-bind	37	126	B4	1e-160	yes	yes	yes	34-127	194-230	284-287			274-280	186	228
	Oryza_sativa	LOC_Os03g53340.1	377	HSF_DNA-bind	54	143	A2	1.3e-136	yes	yes	yes	51-144	171-235	256-270	318-325			178	269
	Oryza_sativa	LOC_Os05g45410.1	460	HSF_DNA-bind	21	110	A4	2e-165	yes	yes	yes	18-111	134-191	210-213	264-273/397-406	443-450		122	200
	Oryza_sativa	LOC_Os09g28200.1	395	HSF_DNA-bind	25	115	B4	7.7e-156	yes	yes	yes	22-116	212-248	338-341		363-370	328-334	198	245
	Oryza_sativa	LOC_Os08g36700.1	381	HSF_DNA-bind	26	120	B4	3.5e-147	yes	yes	yes	23-121	209-245	337-340		365-372	327-333	1	21
	Oryza_sativa	LOC_Os02g29340.1	476	HSF_DNA-bind	22	112	A5	1.5e-190	yes	yes	yes	19-113	133-190	201-216	422-431	462-469		124	209
	Oryza_sativa	LOC_Os02g13800.1	299	HSF_DNA-bind	15	104	C2	9.8e-197	yes	yes	yes	12-106	138-181	213-216				123	213
	Oryza_sativa	LOC_Os06g35960.1	279	HSF_DNA-bind	12	101	C2	3.9e-144	yes	yes	yes	9-103	136-179	219-222				129	189
	Oryza_sativa	LOC_Os01g39020.1	403	HSF_DNA-bind	94	185	A6/A7	9.4e-178	yes	yes	yes	91-186	216-266		348-356			207	267
	Oryza_sativa	LOC_Os01g53220.1	251	HSF_DNA-bind	25	114	C1	1.4e-101	yes	yes	yes	22-116	137-180					124	206
	Oryza_sativa	LOC_Os09g28354.1	303	HSF_DNA-bind	31	120	B1	1.5e-132	yes	yes	yes	28-121	172-209				248-254	169	227
	Oryza_sativa	LOC_Os03g12370.1	411	HSF_DNA-bind	51	139	A8	1.6e-154	yes	yes	yes	49-155	187-244					133	145
	Oryza_sativa	LOC_Os01g43590.1	349	HSF_DNA-bind	27	125	C1	2.2e-98	yes	yes	yes	24-118	178-221					151	249
	Oryza_sativa	LOC_Os06g36930.1	332	HSF_DNA-bind	44	134	A6/A7	1.2e-141	yes	yes	yes	43-135	162-212		269-277			153	262
	Oryza_sativa	LOC_Os03g06630.1	380	HSF_DNA-bind	38	147	A2	4e-129	yes	yes	yes	35-148	164-228	244-258	335-342	369-373		163	251
	Panicum_virgatum	Pavir.Aa01928.1.p	513	HSF_DNA-bind	79	168	A3	5.2e-188	yes	yes	yes	76-169	196-242	268-277				183	274
	Panicum_virgatum	Pavir.J18081.1.p	189	HSF_DNA-bind	47	136	-	-	yes	yes	no	44-137	167-186
	Panicum_virgatum	Pavir.Ab01320.1.p	563	HSF_DNA-bind	130	219	A3	4.4e-194	yes	yes	yes	127-220	247-293	319-328				232	327
	Panicum_virgatum	Pavir.J03297.1.p	424	HSF_DNA-bind	42	131	B2	1.4e-154	yes	yes	yes	39-132	209-245	317-321			308-314	203	253
	Panicum_virgatum	Pavir.Ba03710.1.p	369	HSF_DNA-bind	50	139	A2	2.4e-169	yes	yes	yes	47-140	156-220	236-250	325-332	355-359		154	260
	Panicum_virgatum	Pavir.Ib03391.1.p	360	HSF_DNA-bind	43	132	A6	1.6e-190	yes	yes	yes	40-133	151-215	230-244	316-325	343-353		141	248
	Panicum_virgatum	Pavir.Ba01265.1.p	424	HSF_DNA-bind	41	130	B2	7.2e-154	yes	yes	yes	38-131	208-244	316-320			307-313	202	252
	Panicum_virgatum	Pavir.J32257.1.p	307	HSF_DNA-bind	28	117	B4	6.2e-169	yes	yes	yes	25-118	186-222	286-289			276-282	180	219
	Panicum_virgatum	Pavir.Ia00087.1.p	523	HSF_DNA-bind	54	143	A1	6.3e-252	yes	yes	yes	51-144	39-231	249-259	465-474	509-516		167	259
	Panicum_virgatum	Pavir.Ga00998.1.p	360	HSF_DNA-bind	11	100	B2	8.9e-92	yes	yes	yes	8-101	153-189					140	191
	Panicum_virgatum	Pavir.J01161.1.p	340	HSF_DNA-bind	38	127	A2	1.4e-169	yes	yes	yes	35-128	143-207	223-237	312-319			143	240
	Panicum_virgatum	Pavir.Ca01519.1.p	450	HSF_DNA-bind	24	113	A4	2.1e-190	yes	yes	yes	21-114	137-194	212-215	264-273	429-436		124	208
	Panicum_virgatum	Pavir.Fb02392.1.p	409	HSF_DNA-bind	38	127	B2	1.5e-168	yes	yes	yes	35-128	196-232	310-314			301-307	191	259
	Panicum_virgatum	Pavir.J10885.1.p	181	HSF_DNA-bind	25	115	-	-	yes	no	no	22-116
	Panicum_virgatum	Pavir.Bb02324.1.p	183	HSF_DNA-bind	25	115	-	-	yes	no	no	22-116
	Panicum_virgatum	Pavir.Ib01755.1.p	317	HSF_DNA-bind	37	126	B4	9e-128	yes	yes	yes	34-127	185-221	274-277			264-270	170	219
	Panicum_virgatum	Pavir.J04151.1.p	336	HSF_DNA-bind	38	127	A2	5.2e-167	yes	yes	yes	35-128	143-207	223-237	312-319			143	239
	Panicum_virgatum	Pavir.J00582.1.p	371	HSF_DNA-bind	60	149	A2	9.6e-161	yes	yes	yes	57-150	169-233	252-266	323-330			167	266
	Panicum_virgatum	Pavir.Eb03132.1.p	449	HSF_DNA-bind	14	103	A4	1.6e-207	yes	yes	yes	11-104	127-184	202-205	245-254/384-393	435-442		114	187
	Panicum_virgatum	Pavir.J15979.1.p	336	HSF_DNA-bind	51	140	A6	9.7e-160	yes	yes	yes	48-141	158-224	239-255	324-333			164	254
	Panicum_virgatum	Pavir.Ib00391.1.p	381	HSF_DNA-bind	49	138	A6	4.6e-163	yes	yes	yes	46-139	159-225	240-254	327-336	363-373		154	254
	Panicum_virgatum	Pavir.Ib04475.1.p	468	HSF_DNA-bind	2	88	-	-	no	yes	yes		112-176	194-204	410-419	454-461		112	204
	Panicum_virgatum	Pavir.Ia04008.1.p	423	HSF_DNA-bind	50	139	A8	1.4e-109	yes	yes	yes	48-155	187-244					121	153
	Panicum_virgatum	Pavir.Ia00597.1.p	322	HSF_DNA-bind	12	101	A2	8.2e-122	yes	yes	yes	9-102	121-185	199-213	268-275			90	98
	Panicum_virgatum	Pavir.Ib00928.1.p	423	HSF_DNA-bind	50	139	A8	6.9e-105	yes	yes	yes	48-155	187-244					121	153
	Panicum_virgatum	Pavir.Eb02487.1.p	390	HSF_DNA-bind	82	173	A6/A7	5.7e-132	yes	yes	yes	81-174	204-254		336-344			195	255
	Panicum_virgatum	Pavir.Ea01559.1.p	392	HSF_DNA-bind	86	177	A6/A7	2.4e-133	yes	yes	yes	85-178	208-258		340-348			199	258
	Panicum_virgatum	Pavir.Eb01618.1.p	318	HSF_DNA-bind	26	115	C1	7.4e-108	yes	yes	yes	23-117	159-202					135	229
	Panicum_virgatum	Pavir.J04979.1.p	319	HSF_DNA-bind	25	114	C1	7.7e-111	yes	yes	yes	22-116	152-195					126	223
	Panicum_virgatum	Pavir.Bb02269.1.p	303	HSF_DNA-bind	30	119	B1	7.6e-119	yes	yes	yes	27-120	169-206				252-258	166	238
	Panicum_virgatum	Pavir.J17014.1.p	153	HSF_DNA-bind	11	100	-	-	yes	no	no	8-102
	Panicum_virgatum	Pavir.Ba02028.1.p	302	HSF_DNA-bind	27	116	B1	1.9e-117	yes	yes	yes	24-117	167-204				251-257	163	218
	Panicum_virgatum	Pavir.Ea02962.1.p	170	HSF_DNA-bind	39	128	-	-	yes	no	no	36-130
	Panicum_virgatum	Pavir.Aa02860.1.p	268	HSF_DNA-bind	13	102	C2	3.5e-142	yes	yes	yes	10-104	132-175	214-217				122	223
	Panicum_virgatum	Pavir.J32219.1.p	271	HSF_DNA-bind	40	129	C1	4e-102	yes	yes	yes	37-131	148-191					125	215
	Panicum_virgatum	Pavir.Ab00907.1.p	99	HSF_DNA-bind	13	97	-	-	yes	no	no	10-69
	Panicum_virgatum	Pavir.J36148.1.p	177	HSF_DNA-bind	11	100	-	-	yes	no	no	8-102						115	168
	Panicum_virgatum	Pavir.Da00730.1.p	201	HSF_DNA-bind	54	143	-	-	yes	no	no	53-144
	Panicum_virgatum	Pavir.J00967.1.p	320	HSF_DNA-bind	49	136	A6/A7	1.7e-94	yes	yes	yes	48-139	173-198		268-276			1	24
	Panicum_virgatum	Pavir.Ia01908.1.p	293	HSF_DNA-bind	1	65	-	-	no	yes	yes		84-418	163-177	249-258	276-286		74	182
	Panicum_virgatum	Pavir.J19794.1.p	137	HSF_DNA-bind	45	103	-	-	yes	no	no	42-101
	Panicum_virgatum	Pavir.Aa02052.1.p	97	HSF_DNA-bind	18	77	-	-	yes	no	no	15-75
	Panicum_virgatum	Pavir.Da00715.1.p	115	HSF_DNA-bind	53	111	-	-	yes	no	no	50-111
	Setaria_italica	Seita.1G178400.1.p	512	HSF_DNA-bind	79	168	A3	3.7e-197	yes	yes	yes	76-169	196-242	268-277				183	275
	Setaria_italica	Seita.2G282400.1.p	402	HSF_DNA-bind	41	130	B2	9.8e-163	yes	yes	yes	38-131	208-244	316-320			307-313	202	251
	Setaria_italica	Seita.6G236100.1.p	416	HSF_DNA-bind	45	134	B2	3.6e-176	yes	yes	yes	42-135	204-240	328-332			319-325	200	270
	Setaria_italica	Seita.2G052000.1.p	366	HSF_DNA-bind	47	136	A2	3.1e-172	yes	yes	yes	44-137	153-217	233-247	322-329	352-356		153	257
	Setaria_italica	Seita.2G407800.1.p	311	HSF_DNA-bind	29	118	B4	2.1e-169	yes	yes	yes	26-119	192-228	290-293			280-286	186	225
	Setaria_italica	Seita.7G202900.1.p	307	HSF_DNA-bind	11	100	B2	7.5e-103	yes	yes	yes	8-101	153-189	228-232			219-225	140	194
	Setaria_italica	Seita.9G005900.1.p	525	HSF_DNA-bind	55	144	A1	5.7e-250	yes	yes	yes	52-145	168-232	250-260	467-476	511-518		168	260
	Setaria_italica	Seita.9G393700.1.p	313	HSF_DNA-bind	38	127	B4	5.2e-139	yes	yes	yes	35-128	181-217	271-274			261-267	170	215
	Setaria_italica	Seita.9G056400.1.p	340	HSF_DNA-bind	38	127	A2	5.8e-166	yes	yes	yes	35-128	143-207	223-237	312-319			143	240
	Setaria_italica	Seita.5G318300.1.p	449	HSF_DNA-bind	14	103	A4	1.3e-218	yes	yes	yes	11-104	127-184	202-205	245-254/384-393	435-442		118	187
	Setaria_italica	Seita.3G168900.1.p	450	HSF_DNA-bind	18	107	A4	1.2e-200	yes	yes	yes	15-108	131-188	206-209	258-267/380-389	429-436		117	200
	Setaria_italica	Seita.9G095900.1.p	382	HSF_DNA-bind	59	148	A2	3e-160	yes	yes	yes	56-149	174-238	255-269	324-331			167	272
	Setaria_italica	Seita.1G164400.1.p	483	HSF_DNA-bind	27	117	A5	6e-165	yes	yes	yes	24-118	138-195	206-221	439-448			129	212
	Setaria_italica	Seita.9G484800.1.p	424	HSF_DNA-bind	51	140	A8	1.9e-109	yes	yes	yes	49-156	188-245					129	152
	Setaria_italica	Seita.2G228600.1.p	403	HSF_DNA-bind	28	118	B4	8.3e-156	yes	yes	yes	25-119	220-256	351-354		378-385	341-347	211	253
	Setaria_italica	Seita.9G531900.1.p	385	HSF_DNA-bind	50	139	A6	5.6e-169	yes	yes	yes	47-140	163-228	243-257	330-339	368-378		149	262
	Setaria_italica	Seita.5G207000.1.p	388	HSF_DNA-bind	81	172	A6/A7	7.9e-135	yes	yes	yes	80-173	203-253		334-342			192	300
	Setaria_italica	Seita.9G137000.1.p	312	HSF_DNA-bind	5	96	A6/A7	9.7e-139	yes	yes	yes	4-97	127-177		258-266			116	224
	Setaria_italica	Seita.5G233300.1.p	318	HSF_DNA-bind	28	117	C1	2e-114	yes	yes	yes	25-119	162-205					132	235
	Setaria_italica	Seita.1G025800.1.p	280	HSF_DNA-bind	17	106	C2	1e-161	yes	yes	yes	14-108	134-177	219-222				127	190
	Setaria_italica	Seita.2G229700.1.p	310	HSF_DNA-bind	34	123	B1	5.5e-120	yes	yes	yes	31-124	176-213				259-265	173	233
	Setaria_italica	Seita.4G180500.1.p	270	HSF_DNA-bind	11	100	C2	2e-140	yes	yes	yes	8-102	133-176	211-214				110	188
	Setaria_italica	Seita.9G247700.1.p	390	HSF_DNA-bind	47	162	A2	1.9e-141	yes	yes	yes	44-163	181-245	261-275	346-353			179	278
	Setaria_italica	Seita.5G307400.1.p	266	HSF_DNA-bind	37	126	C1	3.7e-98	yes	yes	yes	34-128	147-190					122	211
	Setaria_italica	Seita.4G238100.1.p	330	HSF_DNA-bind	44	133	A6/A7	1.9e-83	yes	yes	yes	43-134	163-213		278-286			151	211
	Setaria_italica	Seita.4G237900.1.p	354	HSF_DNA-bind	45	134	A6/A7	3.1e-127	yes	yes	yes	44-135	169-219		295-303			154	221
	Setaria_italica	Seita.1G025900.1.p	273	HSF_DNA-bind	141	182	-	-	no	yes	yes		197-240					90	95
	Sorghum_bicolor	Sobic.004G163200.1.p	497	HSF_DNA-bind	67	156	A3	1.2e-200	yes	yes	yes	64-157		1-265				173	263
	Sorghum_bicolor	Sobic.002G271100.3.p	402	HSF_DNA-bind	44	133	B2	4.3e-154	yes	yes	yes	41-134	214-250	322-326			313-319	208	257
	Sorghum_bicolor	Sobic.007G180300.1.p	400	HSF_DNA-bind	45	134	B2	3.6e-176	yes	yes	yes	42-135	197-233	318-322			309-315	194	252
	Sorghum_bicolor	Sobic.002G051900.1.p	373	HSF_DNA-bind	53	142	A2	1.3e-172	yes	yes	yes	50-143	159-223	239-253	329-336	359-363		159	263
	Sorghum_bicolor	Sobic.001G243000.1.p	363	HSF_DNA-bind	46	135	A6	5e-189	yes	yes	yes	43-136	154-218	233-247	319-328	346-356		13	19
	Sorghum_bicolor	Sobic.001G093200.1.p	372	HSF_DNA-bind	59	148	A2	8.5e-171	yes	yes	yes	56-149	166-230	249-263	317-324			164	262
	Sorghum_bicolor	Sobic.002G392500.1.p	313	HSF_DNA-bind	27	116	B4	8.5e-168	yes	yes	yes	24-117	196-232	292-295			282-288	190	229
	Sorghum_bicolor	Sobic.004G150400.1.p	486	HSF_DNA-bind	27	117	A5	5.2e-171	yes	yes	yes	24-118	138-195	206-221	436-445			129	215
	Sorghum_bicolor	Sobic.001G007200.2.p	528	HSF_DNA-bind	49	138	A1	1e-248	yes	yes	yes	46-139	162-226	244-254	464-473	508-515		162	256
	Sorghum_bicolor	Sobic.006G182800.1.p	307	HSF_DNA-bind	11	100	B2	3.7e-107	yes	yes	yes	8-101	152-188	228-232			219-225	139	201
	Sorghum_bicolor	Sobic.001G057700.1.p	340	HSF_DNA-bind	40	130	A2	2.7e-166	yes	yes	yes	37-130	145-209	225-239	314-321			144	243
	Sorghum_bicolor	Sobic.003G295900.1.p	435	HSF_DNA-bind	14	103	-	-	yes	no	no	11-104		201-204	244-253/370-379	421-428		117	191
	Sorghum_bicolor	Sobic.001G361100.1.p	314	HSF_DNA-bind	48	137	B4	2.6e-131	yes	yes	yes	45-138	192-228	282-285			272-278	177	226
	Sorghum_bicolor	Sobic.009G208000.1.p	477	HSF_DNA-bind	28	117	A4	5.4e-218	yes	yes	yes	25-118	141-198	223-226	281-290/418-427	456-463		127	203
	Sorghum_bicolor	Sobic.001G450700.1.p	416	HSF_DNA-bind	51	140	A8	3.1e-110	yes	yes	yes	49-156	188-245					136	141
	Sorghum_bicolor	Sobic.002G224200.1.p	419	HSF_DNA-bind	27	117	B4	2.3e-167	yes	yes	yes	24-118	232-268	369-372		397-404	359-365	215	265
	Sorghum_bicolor	Sobic.001G496200.1.p	392	HSF_DNA-bind	47	136	A6	2.5e-183	yes	yes	yes	44-137	157-222	237-257	344-353			158	257
	Sorghum_bicolor	Sobic.004G101400.1.p	268	HSF_DNA-bind	22	111	C2	5.3e-160	yes	yes	yes	19-113	139-182	216-219				131	200
	Sorghum_bicolor	Sobic.003G194400.1.p	395	HSF_DNA-bind	79	170	A6/A7	2.9e-146	yes	yes	yes	78-171	201-251		337-345			193	286
	Sorghum_bicolor	Sobic.003G226800.1.p	366	HSF_DNA-bind	34	123	C1	8.7e-113	yes	yes	yes	31-125	181-224					159	254
	Sorghum_bicolor	Sobic.002G225300.1.p	316	HSF_DNA-bind	27	116	B1	3.1e-117	yes	yes	yes	24-117	174-211				264-270	169	245
	Sorghum_bicolor	Sobic.010G164400.1.p	280	HSF_DNA-bind	13	102	C2	8.4e-146	yes	yes	yes	10-104	139-182	222-225				127	194
	Sorghum_bicolor	Sobic.003G286700.1.p	261	HSF_DNA-bind	38	127	C1	7.1e-97	yes	yes	yes	35-129	151-194					115	216
	Sorghum_bicolor	Sobic.010G170600.1.p	418	HSF_DNA-bind	92	181	A6/A7	3.4e-132	yes	yes	yes	91-182	209-259		333-341			198	272
	Spirodela_polyrhiza	Spipo9G0002000	368	HSF_DNA-bind	46	135	A6	1.6e-158	yes	yes	yes	43-136	152-216	231-245	323-332	351-361		152	250
	Spirodela_polyrhiza	Spipo17G0016600	281	HSF_DNA-bind	19	108	B2	1.8e-114	yes	yes	yes	16-109	156-192	217-221			208-214	151	221
	Spirodela_polyrhiza	Spipo0G0174900	363	HSF_DNA-bind	38	127	B2	8.8e-143	yes	yes	yes	35-128	187-223	302-306			293-299	181	232
	Spirodela_polyrhiza	Spipo5G0066000	407	HSF_DNA-bind	23	112	A1	7.8e-186	yes	yes	yes	20-113	132-196	215-225	347-356	393-400		132	204
	Spirodela_polyrhiza	Spipo19G0005100	434	HSF_DNA-bind	14	103	A4	3.2e-175	yes	yes	yes	11-104	128-185	203-206	255-264/369-378	420-427		119	200
	Spirodela_polyrhiza	Spipo17G0001000	431	HSF_DNA-bind	25	114	A1	5.1e-224	yes	yes	yes	22-115	137-201	218-228	387-396	415-422		137	215
	Spirodela_polyrhiza	Spipo0G0095000	257	HSF_DNA-bind	42	131	B4	5.5e-115	yes	yes	yes	39-132	205-241					202	236
	Spirodela_polyrhiza	Spipo18G0019000	389	HSF_DNA-bind	14	103	A4	3.5e-136	yes	yes	yes	11-104	127-184	209-212	244-253/354-363			111	186
	Spirodela_polyrhiza	Spipo15G0020500	261	HSF_DNA-bind	14	103	B1	1.4e-95	yes	yes	yes	11-104	146-183				208-214	139	191
	Spirodela_polyrhiza	Spipo0G0042400	349	HSF_DNA-bind	42	131	A2	5.8e-144	yes	yes	yes	39-132	148-212	226-239	263-271/292-299	339-343		2	27
	Spirodela_polyrhiza	Spipo15G0037500	399	HSF_DNA-bind	50	139	A1	3.1e-113	yes	yes	yes	47-140	163-227	245-255				162	273
	Spirodela_polyrhiza	Spipo13G0029800	483	HSF_DNA-bind	19	108	-	-	yes	no	yes	16-109	155-185	196-211	428-437	468-475		120	188
	Spirodela_polyrhiza	Spipo8G0037600	321	HSF_DNA-bind	34	129	A2	1.8e-92	yes	yes	yes	31-130	141-205		247-255/277-284	295-299		143	228
	Triticum_aestivum	Traes_2AS_53BFA14C7.2	479	HSF_DNA-bind	61	150	A3	9.9e-206	yes	yes	yes	58-151	187-233	260-269				168	260
	Triticum_aestivum	Traes_5BL_8D23DFA4A.1	353	HSF_DNA-bind	45	134	A2	4.5e-155	yes	yes	yes	42-135	150-214	230-244	320-327			150	254
	Triticum_aestivum	Traes_1AL_A4B5C1474.2	368	HSF_DNA-bind	52	141	A6	1.3e-166	yes	yes	yes	49-142	159-223	238-252	322-331	352-362		151	256
	Triticum_aestivum	Traes_5BL_FCB1625F3.1	569	HSF_DNA-bind	44	133	B2	5e-161	yes	yes	yes	41-134	217-253	323-327			314-320	208	257
	Triticum_aestivum	Traes_5DL_6EB179C88.1	348	HSF_DNA-bind	40	129	A2	5.2e-150	yes	yes	yes	37-130	145-209	225-239	315-322			136	250
	Triticum_aestivum	Traes_2BS_1484A7516.1	475	HSF_DNA-bind	80	169	A3	5.2e-209	yes	yes	yes	77-170	206-252	279-288				185	271
	Triticum_aestivum	Traes_2BS_3B77DC6C3.1	320	HSF_DNA-bind	39	128	B4	3.5e-151	yes	yes	yes	36-129	201-237	300-303			290-296	195	233
	Triticum_aestivum	Traes_2AS_5C7B75BC5.1	320	HSF_DNA-bind	39	128	B4	2.6e-153	yes	yes	yes	36-129	200-236	299-302			289-295	194	233
	Triticum_aestivum	Traes_2BS_ECF9B4EB4.1	405	HSF_DNA-bind	44	133	A2	1.7e-179	yes	yes	yes	41-134	150-214	230-244	362-369	392-396		149	248
	Triticum_aestivum	Traes_2DS_B6872CB84.1	412	HSF_DNA-bind	43	132	A2	2.2e-178	yes	yes	yes	40-133	149-213	229-243	369-376	399-403		148	246
	Triticum_aestivum	Traes_2DL_481253665.1	149	HSF_DNA-bind	13	102	-	-	yes	no	no	10-103
	Triticum_aestivum	Traes_5BL_A847CD732.1	388	HSF_DNA-bind	26	116	B4	1.4e-151	yes	yes	yes	23-117	207-243	336-339		362-369	326-332	198	239
	Triticum_aestivum	Traes_2BL_33410A32A.1	169	HSF_DNA-bind	13	102	-	-	yes	no	no	10-103
	Triticum_aestivum	Traes_4BL_2E125A702.1	277	HSF_DNA-bind	137	226	-	-	yes	yes	no	134-227	258-277
	Triticum_aestivum	Traes_4AS_52EB860E7.2	341	HSF_DNA-bind	46	135	A6	1.3e-148	yes	yes	yes	43-136	153-217	232-246	311-320			153	240
	Triticum_aestivum	TRAES3BF029100010CFD_t1	441	HSF_DNA-bind	13	102	A4	7.7e-180	yes	yes	yes	10-103	126-183	198-201	244-253/379-388	428-435		117	184
	Triticum_aestivum	Traes_4DL_EE941086E.1	384	HSF_DNA-bind	37	126	A8	1.1e-101	yes	yes	yes	35-142	173-230					119	139
	Triticum_aestivum	Traes_5DL_431CCA490.1	298	HSF_DNA-bind	30	119	B1	7.7e-110	yes	yes	yes	27-120	174-211				247-253	171	225
	Triticum_aestivum	Traes_6AS_1537629B3.1	458	HSF_DNA-bind	20	110	A5	1.9e-177	yes	yes	yes	17-111	131-188	199-214	414-423			122	215
	Triticum_aestivum	TRAES3BF002300100CFD_t1	396	HSF_DNA-bind	41	130	A2	6.5e-132	yes	yes	yes	38-131	147-211	227-241	353-360			153	242
	Triticum_aestivum	Traes_4DL_FA07D8414.1	386	HSF_DNA-bind	134	223	C2	7.2e-144	yes	yes	yes	131-225	251-294	321-324				228	296
	Triticum_aestivum	Traes_4BL_B64C157DC.1	281	HSF_DNA-bind	24	113	C2	4.8e-148	yes	yes	yes	21-115	135-178	213-216				95	187
	Triticum_aestivum	TRAES3BF025700050CFD_t1	237	HSF_DNA-bind	24	113	C2	1.3e-135	yes	yes	yes	21-115	134-177	202-205				119	199
	Triticum_aestivum	TRAES3BF025700030CFD_t1	274	HSF_DNA-bind	19	108	C2	1.5e-188	yes	yes	yes	16-110	132-175	203-206				117	181
	Triticum_aestivum	Traes_4DL_9A51D1EB2.2	278	HSF_DNA-bind	26	115	C2	1.1e-153	yes	yes	yes	23-117	139-182	201-204				107	192
	Triticum_aestivum	Traes_5BL_E15759DAD.1	478	HSF_DNA-bind	4	79	-	-	no	yes	yes		116-180	198-208	421-430	465-472		116	209
	Triticum_aestivum	TRAES3BF021000010CFD_t1	325	HSF_DNA-bind	25	114	C1	1.8e-104	yes	yes	yes	22-116	159-202					133	227
	Triticum_aestivum	TRAES3BF071100100CFD_t1	322	HSF_DNA-bind	21	110	C1	1.5e-91	yes	yes	yes	18-112	154-197					128	225
	Triticum_aestivum	Traes_6DS_C59B6322F.1	432	HSF_DNA-bind	2	84	A5	1.4e-158	yes	yes	yes	14-85	105-162	173-188	388-397			96	187
	Triticum_aestivum	Traes_4AS_02B607421.1	340	HSF_DNA-bind	2	83	A8	3.2e-89	yes	yes	yes	31-99	130-187					81	96
	Triticum_aestivum	Traes_5AL_D369204D3.1	86	HSF_DNA-bind	1	71	-	-	yes	no	no	6-72
	Triticum_aestivum	Traes_3AL_463ABD4BF.1	399	HSF_DNA-bind	2	69	-	-	no	yes	yes		90-147	165-168	211-220/337-346	386-393		83	165
	Triticum_aestivum	Traes_7BS_03F39ED94.1	62	HSF_DNA-bind	2	61
	Triticum_aestivum	Traes_6BS_25E162197.1	357	HSF_DNA-bind	1	65	-	-	no	yes	yes		86-143	154-169				77	168
	Triticum_aestivum	Traes_2AL_D3B2C21A7.1	88	HSF_DNA-bind	13	71	-	-	yes	no	no	10-71
	Triticum_aestivum	TRAES3BF025700040CFD_t1	229	HSF_DNA-bind	2	83	-	-	no	yes	yes		106-149	177-180				101	137
	Triticum_aestivum	Traes_2AS_66F050AC7.1	106	HSF_DNA-bind	43	101	-	-	yes	no	no	40-99
	Triticum_aestivum	Traes_5BL_F80E01D65.1	124	HSF_DNA-bind	30	88	-	-	yes	no	no	27-120
	Triticum_aestivum	Traes_3DL_C5832B670.1	329	HSF_DNA-bind	1	63	A2	4.3e-92	yes	yes	yes	31-64	80-144	160-174	286-293	316-320		86	178
	Triticum_aestivum	Traes_7AS_937121AF8.1	59	HSF_DNA-bind	1	51	-	-	yes	no	no	19-52
	Triticum_aestivum	Traes_7DS_10A9C68FA.1	50	HSF_DNA-bind	1	50
	Triticum_aestivum	Traes_4BL_5091DE58E.1	105	HSF_DNA-bind	1	51	-	-	yes	no	no	19-52
	Triticum_aestivum	Traes_5AL_16AD8DEEC.1	269	HSF_DNA-bind	1	50	A2	7.6e-99	yes	yes	yes	18-51	66-130	146-160	236-243			66	166
	Triticum_aestivum	Traes_2DS_070CE3D50.1	122	HSF_DNA-bind	1	43	-	-	yes	no	no	4-41
	Triticum_aestivum	Traes_4AL_ABD465CB6.1	115	HSF_DNA-bind	38	95	-	-	yes	no	no	55-106
	Triticum_aestivum	Traes_4DS_A980F512E.4	153	HSF_DNA-bind	37	94	-	-	yes	no	no	34-95
	Triticum_aestivum	Traes_7AL_6931AA68B.1	73	HSF_DNA-bind	2	44	-	-	yes	no	no	5-42
	Triticum_aestivum	Traes_4BL_86572BB6D.1	46	HSF_DNA-bind	1	42
	Triticum_aestivum	Traes_4DL_66D0047A7.1	174	HSF_DNA-bind	124	174	-	-	yes	no	no	121-159		112-118
	Triticum_aestivum	Traes_4BL_F3AB558D4.1	91	HSF_DNA-bind	46	91	-	-	yes	no	no	44-68
	Triticum_aestivum	TRAES3BF025700020CFD_t1	237	HSF_DNA-bind	8	74	-	-	no	yes	yes		97-140	168-171				84	152
	Triticum_aestivum	Traes_4BL_F6C3B5069.1	70	HSF_DNA-bind	1	35	-	-	yes	no	no	3-36
	Triticum_aestivum	Traes_7DL_82722EDAD.2	128	HSF_DNA-bind	1	21	-	-	yes	no	no	1-52
	Zea_mays	GRMZM2G165272_P01	395	HSF_DNA-bind	45	134	B2	4.8e-156	yes	yes	yes	42-135	210-246	318-322			309-315	204	253
	Zea_mays	GRMZM2G059851_P01	509	HSF_DNA-bind	76	165	A3	1.6e-230	yes	yes	yes	73-166		1-274				180	272
	Zea_mays	GRMZM2G098696_P01	371	HSF_DNA-bind	37	126	B2	1.1e-187	yes	yes	yes	34-127	192-228	298-302			289-295	188	241
	Zea_mays	GRMZM2G125969_P01	376	HSF_DNA-bind	52	141	A2	9e-169	yes	yes	yes	49-142	158-222	238-252	319-321/332-339	362-366		158	261
	Zea_mays	GRMZM2G164909_P01	415	HSF_DNA-bind	72	161	B2	7.3e-177	yes	yes	yes	69-162	224-260	338-342			329-335	219	275
	Zea_mays	GRMZM2G025685_P01	188	HSF_DNA-bind	27	116	-	-	yes	no	no	24-117
	Zea_mays	GRMZM2G301485_P01	319	HSF_DNA-bind	11	100	B2	6.3e-114	yes	yes	yes	8-101	154-190	232-236			223-229	141	199
	Zea_mays	AC205471.4_FGP003	447	HSF_DNA-bind	13	102	A4	4.5e-191	yes	yes	yes	10-103	126-183	204-207	256-265/387-396	429-436		113	186
	Zea_mays	GRMZM2G179802_P01	485	HSF_DNA-bind	25	115	A5	3.7e-167	yes	yes	yes	22-116	136-193	204-219	435-444			127	214
	Zea_mays	GRMZM2G384339_P01	498	HSF_DNA-bind	32	121	A1	9.5e-235	yes	yes	yes	29-122	145-209	227-237	436-445	477-484		145	238
	Zea_mays	AC216247.3_FGP001	324	HSF_DNA-bind	52	141	B4	8.5e-127	yes	yes	yes	49-142	204-240	297-300			287-293	196	238
	Zea_mays	GRMZM2G118453_P01	434	HSF_DNA-bind	10	99	A4	2e-232	yes	yes	yes	7-100	123-180	198-201	242-251/242-251	420-427		116	185
	Zea_mays	GRMZM2G118485_P01	409	HSF_DNA-bind	51	140	A8	4.4e-109	yes	yes	yes	49-156	188-245					136	141
	Zea_mays	GRMZM2G115456_P01	528	HSF_DNA-bind	59	148	A1	1.8e-230	yes	yes	yes	56-149	172-236	254-264	470-479	508-515		172	265
	Zea_mays	GRMZM2G010871_P01	358	HSF_DNA-bind	46	135	A6	5.3e-194	yes	yes	yes	43-136	154-218	233-247	314-323	341-351		151	251
	Zea_mays	GRMZM2G026742_P01	408	HSF_DNA-bind	51	140	A8	7.3e-106	yes	yes	yes	49-156	188-245					135	142
	Zea_mays	AC206165.3_FGP007	470	HSF_DNA-bind	25	114	A4	4.3e-172	yes	yes	yes	22-115	138-195		273-282/408-417	449-456		123	211
	Zea_mays	GRMZM2G088242_P01	395	HSF_DNA-bind	22	112	B4	1.2e-173	yes	yes	yes	19-113	219-255	344-347		369-376	334-340	212	252
	Zea_mays	GRMZM2G105348_P01	258	HSF_DNA-bind	15	104	C2	1.4e-177	yes	yes	yes	12-106	128-171	202-205				119	188
	Zea_mays	GRMZM2G002131_P01	299	HSF_DNA-bind	18	107	B1	9.7e-119	yes	yes	yes	15-108	167-204				248-254	163	214
	Zea_mays	GRMZM2G005815_P01	463	HSF_DNA-bind	140	231	A6/A7	1.7e-159	yes	yes	yes	139-232	263-313		400-408			254	349
	Zea_mays	GRMZM2G086880_P01	349	HSF_DNA-bind	35	124	C1	2.6e-112	yes	yes	yes	32-126	169-212	240-245				156	240
	Zea_mays	GRMZM2G089525_P01	332	HSF_DNA-bind	27	116	C1	3.5e-110	yes	yes	yes	24-118	164-207					144	239
	Zea_mays	GRMZM2G139535_P01	299	HSF_DNA-bind	20	109	B1	7.8e-116	yes	yes	yes	17-110	164-201				248-254	160	218
	Zea_mays	GRMZM2G118047_P01	268	HSF_DNA-bind	13	102	C2	3.5e-157	yes	yes	yes	10-104	131-174	210-213				123	187
	Zea_mays	GRMZM2G173090_P01	366	HSF_DNA-bind	51	155	A6/A7	8.5e-84	yes	yes	yes	50-141	182-232		305-313			172	244
	Zea_mays	GRMZM2G132971_P02	117	HSF_DNA-bind	40	98	-	-	yes	no	no	37-96
	Zea_mays	GRMZM2G003489_P03	118	HSF_DNA-bind	53	111	-	-	yes	no	no	50-109
Basal angiosperms	Amborella_trichopoda	evm_27.model.AmTr_v1.0_scaffold00132.31	279	HSF_DNA-bind	15	104	B1	4.5e-121	yes	yes	yes	12-105	150-187				226-232	141	201
	Amborella_trichopoda	evm_27.model.AmTr_v1.0_scaffold00095.3	292	HSF_DNA-bind	25	114	B4	4e-130	yes	yes	yes	22-115	170-206	267-270			257-263	162	199
	Amborella_trichopoda	evm_27.model.AmTr_v1.0_scaffold00069.41	327	HSF_DNA-bind	25	114	B2	4.1e-153	yes	yes	yes	22-115	164-200	262-266			253-259	149	205
	Amborella_trichopoda	evm_27.model.AmTr_v1.0_scaffold00040.220	484	HSF_DNA-bind	55	144	A3	2.5e-133	yes	yes	yes	52-145	174-220	246-255				160	253
	Amborella_trichopoda	evm_27.model.AmTr_v1.0_scaffold00069.91	451	HSF_DNA-bind	29	118	A1	1.6e-120	yes	yes	yes	26-119	140-197	213-223	391-400	433-440		138	226
	Amborella_trichopoda	evm_27.model.AmTr_v1.0_scaffold00048.34	508	HSF_DNA-bind	14	103	A1	7.6e-243	yes	yes	yes	11-104	126-190	206-216		490-497		123	258
	Amborella_trichopoda	evm_27.model.AmTr_v1.0_scaffold00009.376	189	HSF_DNA-bind	20	109	B5	9.8e-70	yes	yes	yes	17-110	133-173					117	173
	Amborella_trichopoda	evm_27.model.AmTr_v1.0_scaffold00073.4	342	HSF_DNA-bind	25	114	B4	5.6e-156	yes	yes	yes	22-115	172-208					161	201
	Amborella_trichopoda	evm_27.model.AmTr_v1.0_scaffold00002.589	336	HSF_DNA-bind	68	157	A6	5e-92	yes	yes	yes	65-158	180-236	264-270		319-329		1	19
	Amborella_trichopoda	evm_27.model.AmTr_v1.0_scaffold00036.48	369	HSF_DNA-bind	41	130	A2	6e-167	yes	yes	yes	38-131	146-210	225-238	274-282/312-319/348-356	357-363		147	231
	Amborella_trichopoda	evm_27.model.AmTr_v1.0_scaffold00013.281	503	HSF_DNA-bind	22	111	A5	2.4e-172	yes	yes	yes	19-112	136-193	204-219	449-458	489-496		128	204
	Amborella_trichopoda	evm_27.model.AmTr_v1.0_scaffold00176.7	79	HSF_DNA-bind	12	70	-	-	yes	no	no	9-68
Gymnosperms	Picea_abies	MA_110587g0010	384	HSF_DNA-bind	27	116	B2	5.4e-122	yes	yes	yes	24-117	193-229	322-326			313-319	186	248
	Picea_abies	MA_12808g0010	477	HSF_DNA-bind	16	105	-	-	yes	yes	no	13-106	128-134	170-180	413-422	464-471		112	189
	Picea_abies	MA_5374g0010	336	HSF_DNA-bind	26	115	B1	1.7e-159	yes	yes	yes	23-116	160-197				302-308	152	199
	Picea_abies	MA_10432269g0010	548	HSF_DNA-bind	42	131	A1	3.8e-174	yes	yes	yes	39-132	154-211	227-237	417-426			147	254
	Picea_abies	MA_29913g0010	442	HSF_DNA-bind	47	136	A1	5.7e-163	yes	yes	yes	44-137	164-228	245-255		309-316		169	256
	Picea_abies	MA_8845456g0010	404	HSF_DNA-bind	25	114	B4	7.5e-160	yes	yes	yes	22-115	195-231	359-362			349-355	177	225
	Picea_abies	MA_91466g0010	450	HSF_DNA-bind	63	152	B4	7.9e-180	yes	yes	yes	60-153	234-270	405-408			395-401	216	264
	Picea_abies	MA_41252g0020	424	HSF_DNA-bind	11	100	A1	5.2e-95	yes	yes	yes	8-101	134-191					126	203
	Picea_abies	MA_10293408g0010	509	HSF_DNA-bind	15	104	A1	1.7e-190	yes	yes	yes	12-105	131-188	205-215	446-455	496-503		108	211
	Picea_abies	MA_8992661g0010	228	HSF_DNA-bind	26	115	B1	3.6e-63	yes	yes	yes	23-116	149-186				221-227	135	181
	Picea_abies	MA_8812600g0010	240	HSF_DNA-bind	17	106	B1	4.8e-59	yes	yes	yes	14-107	147-184				233-239	142	183
	Picea_abies	MA_13910g0010	225	HSF_DNA-bind	18	107	B1	1.7e-57	yes	yes	yes	15-108	145-182				218-224	102	184
	Picea_abies	MA_113508g0010	236	HSF_DNA-bind	27	116	B1	3.4e-60	yes	yes	yes	24-117	156-193				229-235	157	183
	Picea_abies	MA_10100585g0010	228	HSF_DNA-bind	18	107	B1	1.3e-63	yes	yes	yes	15-108	148-185				221-227	140	188
	Picea_abies	MA_9434330g0010	228	HSF_DNA-bind	18	107	B1	1.3e-63	yes	yes	yes	15-108	148-185				221-227	140	188
	Picea_abies	MA_11527g0010	287	HSF_DNA-bind	79	168	B1	1e-54	yes	yes	yes	76-169	206-243	280-286				205	243
	Picea_abies	MA_10434393g0010	116	HSF_DNA-bind	42	100	-	-	yes	no	no	39-98
	Picea_abies	MA_94285g0010	116	HSF_DNA-bind	42	100	-	-	yes	no	no	39-98
	Picea_abies	MA_10428298g0010	78	HSF_DNA-bind	2	52	-	-	yes	no	no	13-52
	Picea_abies	MA_124940g0010	303	HSF in PANTHER	100	263	-	-	-	-	-	-	-	-	-	-	-	102	152
	Picea_abies	MA_43896g0010	371	HSF in PANTHER	2	192	-	-	-	-	-	-	-	-	-	-	-	15	110
	Ginkgo_biloba	Gb_00558	499	HSF_DNA-bind	14	103	A1	5.8e-204	yes	yes	yes	11-104	126-183	200-210		448-455		107	210
	Ginkgo_biloba	Gb_05885	311	HSF_DNA-bind	18	107	B4	2.5e-96	yes	yes	yes	15-108	158-194	288-291			278-284	155	191
	Ginkgo_biloba	Gb_11758	445	HSF_DNA-bind	50	139	A1	4e-163	yes	yes	yes	47-140	162-219	236-246	380-389	430-437		159	253
	Ginkgo_biloba	Gb_14573	380	HSF_DNA-bind	26	158	B1	5.6e-68	yes	yes	yes	23-116	205-242				345-351	200	243
	Ginkgo_biloba	Gb_15358	521	HSF_DNA-bind	16	105	A1	1.2e-269	yes	yes	yes	13-106	127-191	208-218	455-464	507-514		127	231
	Ginkgo_biloba	Gb_16343	487	HSF_DNA-bind	44	133	A1	1.1e-193	yes	yes	yes	41-134	156-213	229-239	424-433	472-479		149	257
	Ginkgo_biloba	Gb_19891	382	HSF_DNA-bind	9	98	A1	2.2e-132	yes	yes	yes	6-99	115-179	195-205	315-324	340-347		114	197
	Ginkgo_biloba	Gb_37236	338	HSF_DNA-bind	26	115	B1	8.7e-131	yes	yes	yes	23-116	164-201				280-286	158	206
	Pinus_taeda	PITA_000007283-RA	267	HSF_DNA-bind	59	148	-	-	yes	no	no	56-149					260-266	185	213
	Pinus_taeda	PITA_000007287-RA	245	HSF_DNA-bind	36	125	B1	1.8e-64	yes	yes	yes	33-126	165-202				238-244	161	198
	Pinus_taeda	PITA_000010355-RA	506	HSF_DNA-bind	15	104	A1	3.1e-187	yes	yes	yes	12-105	129-186	203-213	443-452	493-500		121	210
	Pinus_taeda	PITA_000011691-RA	228	HSF_DNA-bind	26	115	B1	4.1e-64	yes	yes	yes	23-116	149-186				221-227	135	181
	Pinus_taeda	PITA_000019027-RA	494	HSF_DNA-bind	43	132	A1	1.7e-187	yes	yes	yes	40-133	158-222	239-249	377-386	418-425		162	277
	Pinus_taeda	PITA_000019652-RA	423	HSF_DNA-bind	25	114	B4	3.7e-170	yes	yes	yes	22-115	208-244	382-385			372-378	189	238
	Pinus_taeda	PITA_000023327-RA	476	HSF_DNA-bind	15	104	A1	1.2e-219	yes	yes	yes	12-105	127-184	201-211	411-420	463-470		120	220
	Pinus_taeda	PITA_000023671-RA	228	HSF_DNA-bind	26	115	B1	5.8e-60	yes	yes	yes	23-116	149-186				221-237	137	181
	Pinus_taeda	PITA_000024482-RA	528	HSF_DNA-bind	28	117	A1	7.9e-259	yes	yes	yes	25-118	140-204	221-231	464-473	515-522		140	242
	Pinus_taeda	PITA_000028438-RA	300	HSF_DNA-bind	32	121	-	-	yes	no	no	29-122					226-232
	Pinus_taeda	PITA_000031067-RA	482	HSF_DNA-bind	42	131	A1	8.6e-178	yes	yes	yes	39-132	154-211	227-237	417-426	468-475		147	251
	Pinus_taeda	PITA_000031218-RA	276	HSF_DNA-bind	51	140	B1	5.7e-56	yes	yes	yes	48-141	181-218				269-275	172	215
	Pinus_taeda	PITA_000034503-RA	259	HSF_DNA-bind	51	140	B4	8.9e-52	yes	yes	yes	48-141	169-205					160	204
	Pinus_taeda	PITA_000034509-RA	168	HSF_DNA-bind	39	77	-	-	yes	no	no	18-55
	Pinus_taeda	PITA_000035741-RA	249	HSF_DNA-bind	44	133	B1	2.1e-49	yes	yes	yes	41-134	173-210				242-248
	Pinus_taeda	PITA_000036078-RA	355	HSF_DNA-bind	27	116	B1	6.1e-148	yes	yes	yes	24-117	167-204				298-304	156	205
	Pinus_taeda	PITA_000042520-RA	212	HSF_DNA-bind	151	197	-	-	yes	no	no	148-173						126	130
	Pinus_taeda	PITA_000058040-RA	212	HSF_DNA-bind	7	94	B4	8.8e-35	yes	yes	yes	29-95	133-169					100	168
	Pinus_taeda	PITA_000064308-RA	336	HSF_DNA-bind	26	115	B1	5.4e-148	yes	yes	yes	23-116	160-197				302-308	154	198
	Pinus_taeda	PITA_000066254-RA	400	HSF_DNA-bind	25	114	B4	2.7e-137	yes	yes	yes	22-115	188-224	360-363			350-356	176	217
	Pinus_taeda	PITA_000067686-RA	225	HSF_DNA-bind	18	107	B1	1.9e-51	yes	yes	yes	15-108	145-182				218-224	116	183
	Pinus_taeda	PITA_000069337-RA	401	HSF_DNA-bind	11	100	A1	1.3e-94	yes	yes	yes	8-101	132-189					127	201
	Pinus_taeda	PITA_000071813-RA	368	HSF_DNA-bind	100	214	-	-	yes	no	no	75-126						148	195
	Pinus_taeda	PITA_000090447-RA	216	HSF in CATH	8	83	B4	8.3e-12	yes	yes	yes	18-84	125-161	213-216			203-209	22	35
	Pinus_taeda	PITA_000090475-RA	235	HSF in PANTHER	4	109	A2	1.5e-25	yes	yes	yes	2-35	59-123					62	125
	Pinus_taeda	PITA_000094958-RA	354	HSF_DNA-bind	32	121	B2	1.9e-131	yes	yes	yes	29-122	163-199	292-296			283-289	153	211
	Pinus_taeda	PITA_000011563-RA	101	HSF in PANTHER	2	95	-	-	-	-	-	-	-	-	-	-	-	20	91
	Pinus_taeda	PITA_000046665-RA	166	HSF in PANTHER	19	97	-	-	-	-	-	-	-	-	-	-	-	21	79
	Pinus_taeda	PITA_000090891-RA	157	HSF in PANTHER	1	86	-	-	-	-	-	-	-	-	-	-	-	1	67
	Pinus_taeda	PITA_000076889-RA	289	HSF in PANTHER	35	135	-	-	-	-	-	-	-	-	-	-	-	45	119
Pteridophyta	Selaginella_moellendorffii	39384	178	HSF_DNA-bind	2	91	-	-	yes	no	no	1-92
	Selaginella_moellendorffii	25564	191	HSF_DNA-bind	9	98	-	-	yes	no	no	6-99						138	177
	Selaginella_moellendorffii	107503	92	HSF_DNA-bind	26	115	-	-	yes	yes	no	23-116	158-177
	Selaginella_moellendorffii	39375	176	HSF_DNA-bind	2	91	-	-	yes	no	no	1-92
	Selaginella_moellendorffii	37324	320	HSF_DNA-bind	15	104	-	-	yes	yes	no	12-105	130-136					130	209
	Selaginella_moellendorffii	92634	178	HSF_DNA-bind	25	114	B1	1.5e-143	yes	yes	yes	22-115	184-221	268-274			261-267
	Selaginella_moellendorffii	93081	427	HSF_DNA-bind	27	116	-	-	yes	no	no	24-117						130	209
Bryophyta	Physcomitrella_patens	Pp3c21_18820V3.1.p	456	HSF_DNA-bind	26	115	B1	2.8e-102	yes	yes	yes	23-116	170-207				332-338	166	210
	Physcomitrella_patens	Pp3c7_4270V3.1.p	405	HSF_DNA-bind	29	118	B1	3.3e-96	yes	yes	yes	26-119	173-210				335-341	168	217
	Physcomitrella_patens	Pp3c22_9250V3.1.p	418	HSF_DNA-bind	26	115	B1	5.1e-90	yes	yes	yes	23-116	168-205				326-332	163	207
	Physcomitrella_patens	Pp3c18_9360V3.1.p	468	HSF_DNA-bind	26	115	B1	7.7e-98	yes	yes	yes	23-116	170-207	351-357			322-328	160	211
	Physcomitrella_patens	Pp3c7_7720V3.1.p	530	HSF_DNA-bind	46	135	A1	1.9e-147	yes	yes	yes	43-136	156-213		405-414	457-464		125	238
	Physcomitrella_patens	Pp3c1_32480V3.1.p	526	HSF_DNA-bind	59	148	A1	1.4e-226	yes	yes	yes	56-149	178-242	259-269	454-463	519-526		154	171
	Physcomitrella_patens	Pp3c2_9580V3.1.p	494	HSF_DNA-bind	59	148	A1	6.6e-219	yes	yes	yes	56-149	176-240	257-267	449-458	515-522		156	165
	Physcomitrella_patens	Pp3c11_20430V3.2.p	485	HSF_DNA-bind	45	151	A1	1.5e-96	yes	yes	yes	42-135	165-229		431-440	483-490		142	251
	sphagnum_fallax	Sphfalx0067s0105.1.p	517	HSF_DNA-bind	35	124	A1	2.9e-140	yes	yes	yes	32-125	147-211		417-426	474-481		116	224
	sphagnum_fallax	Sphfalx0003s0024.1.p	494	HSF_DNA-bind	53	142	A1	9e-185	yes	yes	yes	50-143	166-230	248-258	435-444	506-513		164	263
	sphagnum_fallax	Sphfalx0080s0077.1.p	518	HSF_DNA-bind	40	129	A1	1.9e-166	yes	yes	yes	37-130	151-215	233-243	425-434			151	273
	sphagnum_fallax	Sphfalx0086s0033.1.p	639	HSF_DNA-bind	58	147	A1	1.4e-147	yes	yes	yes	55-148	168-232	250-260	442-451	507-514		152	277
	sphagnum_fallax	Sphfalx0046s0041.1.p	572	HSF_DNA-bind	93	182	B4	7.8e-95	yes	yes	yes	90-183	253-289	517-520		368-370	507-513	249	306
	sphagnum_fallax	Sphfalx0008s0027.1.p	532	HSF_DNA-bind	26	115	B4	2.5e-97	yes	yes	yes	23-116	190-226	426-429			416-422	184	231
	sphagnum_fallax	Sphfalx0148s0009.1.p	531	HSF_DNA-bind	37	126	B1	1.1e-104	yes	yes	yes	34-127	197-234				415-421	189	249
	sphagnum_fallax	Sphfalx0305s0001.1.p	517	HSF_DNA-bind	72	161	A1	2e-146	yes	yes	yes	69-162	181-245	263-273	455-464	520-527		180	285
	sphagnum_fallax	Sphfalx0032s0107.1.p	425	HSF_DNA-bind	53	142	A1	4.1e-191	yes	yes	yes	50-143	166-230	248-258	438-447	506-513		164	259
	sphagnum_fallax	Sphfalx0004s0025.1.p	802	HSF_DNA-bind	34	128	B4	1.2e-36	yes	yes	yes	31-125	213-249	376-379				209	257
Chlorophyta	Chlamydomonas_reinhardtii	Cre09.g387150.t1.2	1249	HSF_DNA-bind	11	100	A1	7.5e-91	yes	yes	yes	8-101	146-211	242-252				148	227
	Chlamydomonas_reinhardtii	Cre07.g354500.t1.1	189	HSF_DNA-bind	17	106	-	-	yes	no	no	14-107		885-891
	Micromonas_pusilla_CCMP1545	43666	507	HSF_DNA-bind	11	101	-	-	yes	no	no	9-102						137	169
	Micromonas_pusilla_CCMP1545	48763	284	HSF_DNA-bind	34	122	-	-	yes	no	no	31-124						175	247
	Micromonas_pusilla_CCMP1545	48162	135	HSF_DNA-bind	26	121	-	-	yes	no	no	23-118
	Micromonas_pusilla_CCMP1545	59938	166	HSF_DNA-bind	20	112	-	-	yes	no	no	17-112
	Ostreococcus_lucimarinus	8561	1241	HSF_DNA-bind	1	86	-	-	yes	yes	no	36-87	113-163	179-180				99	164
	Volvox_carteri	Vocar.0005s0123.1.p	784	HSF_DNA-bind	22	111	-	-	yes	no	no	19-112						546	601
	Volvox_carteri	Vocar.0033s0073.1.p	282	HSF_DNA-bind	11	100	A1	9.4e-87	yes	yes	yes	8-101	145-210	240-250				147	223
Vertebrates	Anolis_carolinensis	ENSACAP00000012859.3	533	HSF_DNA-bind	20	120	A3	1.3e-22	yes	yes	yes	17-121	146-192	220-229				110	195
	Anolis_carolinensis	ENSACAP00000012425.2	560	Vert_HS_TF	251	533	B1	1.1e-15	yes	yes	yes	16-109	161-198					104	210
	Anolis_carolinensis	ENSACAP00000001246.3		Vert_HS_TF	248	535	A2	7.8e-14	yes	yes	yes	21-125	150-214
	Anolis_carolinensis	ENSACAP00000000596.2	416	HSF_DNA-bind
	Danio_rerio	ENSDARP00000130593.1	286	HSF_DNA-bind	19	119	-	-	yes	no	no	60-128
	Danio_rerio	ENSDARP00000025988.6	489	HSF_DNA-bind	21	121	B1	8.5e-17	yes	yes	yes	18-111	160-197					112	201
	Danio_rerio	ENSDARP00000069555.1	539	Vert_HS_TF	386	460	A3	1.5e-14	yes	yes	yes	7-111	136-182					101	204
	Danio_rerio	ENSDARP00000005404.7	563	Vert_HS_TF	244	520	A3	8.7e-23	yes	yes	yes	18-122	164-210					107	213
	Gallus_gallus	ENSGALP00000031100.2	598	Vert_HS_TF	243	538	A3	6e-16	yes	yes	yes	21-125	171-217					117	213
	Gallus_gallus	ENSGALP00000001526.4	129	HSF_DNA-bind	15	133	-	-	yes	no	no	63-131
	Gallus_gallus	ENSGALP00000026456.1	510	HSF_DNA-bind	3	85	-	-	yes	no	no	4-86						72	161
	Gallus_gallus	ENSGALP00000005096.4	467	Vert_HS_TF	256	427	A3	1.8e-19	yes	yes	yes	17-121	146-192					110	197
	Gallus_gallus	ENSGALP00000039922.1	423	Vert_HS_TF	248	441	A3	2e-17	yes	yes	yes	16-120	159-205					113	198
	Homo_Sapiens	ENSP00000359444.4	401	HSF_DNA-bind	99	211	-	-	yes	no	no	126-192
	Homo_Sapiens	ENSP00000306549.3	423	HSF_DNA-bind	80	194	-	-	yes	no	no	102-195						226	233
	Homo_Sapiens	ENSP00000469223.1	401	HSF_DNA-bind	99	211	-	-	yes	no	no	126-192
	Homo_Sapiens	ENSP00000303599.2	536	HSF_DNA-bind	80	194	-	-	yes	no	no	102-195						226	233
	Homo_Sapiens	ENSP00000357440.4	492	Vert_HS_TF	230	511	B1	4.5e-15	yes	yes	yes	7-100	149-186					102	203
	Homo_Sapiens	ENSP00000430947.1	529	HSF_DNA-bind	20	120	B1	3.5e-12	yes	yes	yes	17-110	159-196					111	121
	Homo_Sapiens	ENSP00000431512.1	596	Vert_HS_TF	247	529	B2	2.2e-18	yes	yes	yes	15-108	161-197					103	209
	Homo_Sapiens	ENSP00000313243.3	492	HSF_DNA-bind	14	129	-	-	yes	no	no	66-134						364	382
	Mus_musculus	ENSMUSP00000048904.2	517	HSF_DNA-bind	20	120	B1	5.4e-13	yes	yes	yes	17-110	159-196					111	121
	Mus_musculus	ENSMUSP00000078761.4	392	Vert_HS_TF	393	492	B1	4.2e-16	yes	yes	yes	7-100	149-186					102	199
	Mus_musculus	ENSMUSP00000049715.4	503	HSF_DNA-bind	80	194	-	-	yes	no	no	107-173		329-339
	Mus_musculus	ENSMUSP00000072617.5	624	Vert_HS_TF	413	503	A3	1.4e-22	yes	yes	yes	15-119	161-207					103	209
	Mus_musculus	ENSMUSP00000091488.3	492	HSF_DNA-bind	15	152	-	-	yes	no	no	67-133						389	416
	Mus_musculus	ENSMUSP00000052508.4	384	HSF_DNA-bind	12	112	B2	3e-19	yes	yes	yes	9-102	135-171					78	89
	Pan_troglodytes	ENSPTRP00000048407.2	510	HSF_DNA-bind	76	188	-	-	yes	no	no	76-169
	Pan_troglodytes	ENSPTRP00000031689.4	209	Vert_HS_TF	204	485	-	-	yes	no	no	7-111						101	155
	Pan_troglodytes	ENSPTRP00000038785.3	598	HSF_DNA-bind	76	178	-	-	yes	no	no	76-169
	Pan_troglodytes	ENSPTRP00000016053.4	492	HSF_DNA-bind	14	129	-	-	yes	no	no	66-134						366	384
	Pan_troglodytes	ENSPTRP00000014029.4	510	HSF_DNA-bind	20	120	B1	3.2e-12	yes	yes	yes	17-110	159-196					111	121
	Xenopus_tropicalis	ENSXETP00000063551.1	538	Vert_HS_TF	255	426	A3	3.4e-20	yes	yes	yes	17-121	160-206					157	191
	Xenopus_tropicalis	ENSXETP00000050320.3	549	Vert_HS_TF	243	514	A3	1.9e-16	yes	yes	yes	7-111	157-203					101	202
	Xenopus_tropicalis	ENSXETP00000021512.2	375	Vert_HS_TF	287	438	A1	2.7e-17	yes	yes	yes	13-106	147-204		411-420			106	195
	Xenopus_tropicalis	ENSXETP00000062660.1	467	HSF_DNA-bind	17	124	-	-	yes	no	no	43-114
	Xenopus_tropicalis	ENSXETP00000023575.2	536	HSF_DNA-bind	10	110	A1	1.3e-18	yes	yes	yes	7-100	143-200					117	171
	Xenopus_tropicalis	ENSXETP00000012537.3	671	Vert_HS_TF	244	534	B1	1.6e-14	yes	yes	yes	12-105	157-194					101	206
Invertebrates	Caenorhabditis_elegans	Y53C10A.12	421	HSF_DNA-bind	92	194	A3	6.1e-17	yes	yes	yes	89-195	223-269					4	38
	Ciona_intestinalis	ENSCINP00000016228.3	733	HSF_DNA-bind	27	130	-	-	yes	no	no	70-121						330	348
	Drosophila_melanogaster	FBpp0110266	523	HSF_DNA-bind	49	148	B3	2.3e-13	yes	yes	yes	46-139	183-218					3	31
Fungi	Aspergillus_nidulans	CADANIAP00000478	798	HSF_DNA-bind	116	164	-	-	yes	no	no	132-183						185	278
	Aspergillus_nidulans	CADANIAP00004056	558	HSF_DNA-bind	151	253	B1	1.2e-12	yes	yes	yes	148-241	331-368					121	166
	Aspergillus_nidulans	CADANIAP00005040	448	HSF_DNA-bind	1	96	-	-	yes	no	no	13-96						106	187
	Batrachochytrium_dendrobatidis	BDET_07653	783	HSF_DNA-bind	1	175			no	yes	yes		65-121	135-141		282-292		40	127
	Cryptococcus_neoformans	AAW41451	803	HSF_DNA-bind	83	184	A3	3.2e-18	yes	yes	yes	80-185	284-330					266	351
	Cryptococcus_neoformans	AAW41959	1028	HSF_DNA-bind	209	307	-	-	yes	no	no	222-297
	Cryptococcus_neoformans	AAW44595	494	HSF_DNA-bind	205	305	-	-	yes	no	no	216-309						179	233
	Cryptococcus_neoformans	AAW45332	595	HSF_DNA-bind	10	91	-	-	yes	no	no	11-86						224	269
	Neurospora_crassa	EFNCRP00000003124	787	HSF_DNA-bind	22	54			no	yes	yes		299-334					62	150
	Neurospora_crassa	EFNCRP00000008448	557	HSF_DNA-bind	144	245	B1	3.5e-11	yes	yes	yes	141-234	323-360					113	160
	Neurospora_crassa	EFNCRP00000008498	833	HSF_DNA-bind	116	177	-	-	yes	no	no	74-168						210	272
	Saccharomyces_cerevisiae	YGL073W	456	HSF_DNA-bind	175	274	-	-	yes	no	no	172-265						266	272
	Saccharomyces_cerevisiae	YGR249W	358	HSF_DNA-bind	6	116	-	-	yes	no	no	27-64
	Saccharomyces_cerevisiae	YJR147W	766	HSF_DNA-bind	13	101	-	-	yes	no	no	10-103						140	206
	Saccharomyces_cerevisiae	YOR140W	539	HSF_DNA-bind	65	205	-	-	yes	no	no	62-154						336	373
	Schizosaccharomyces_pombe	SPAC8C9.14.1:pep	609	HSF_DNA-bind	10	110	-	-	yes	no	no	7-110						113	190
	Schizosaccharomyces_pombe	SPAC2E12.02.1:pep		HSF_DNA-bind	53	154	-	-	yes	no	no	50-143
