# Supplementary material for: Evolutionary Origin, Gradual Accumulation and Functional Divergence of Heat Shock Factor Gene Family with Plant Evolution
Source: Front Plant Sci. 2018 Feb 2;9:71. doi: 10.3389/fpls.2018.00071 (PMC5801592; doi:10.3389/fpls.2018.00071)
Supplement: Supplementary file 3 [file Table3.XLSX]

## Sheet: Supporting Information Table S3
Table S3. The species used for phylogenetic tree construction
Taxonomy	Species	Abbreviation	Common name
Eudicots	Theobroma cacao	Thc	cacao
	Citrus sinensis	Cis	sweet orange
	Prunus persica	Prp	peach
	Arabidopsis thaliana	Art
	Eutrema salsugineum	Eus
	Carica papaya	Cap	papaya
	Cucumis sativus	Cus	cucumber
	Ricinus communis	Ric	castor bean
	Glycine max	Glm	soybean
	Medicago truncatula	Met	barrel medic
	Eucalyptus grandis	Eug	rose gum
	Populus trichocarpa	Pot	black cottonwood
	Vitis vinifera	Viv	wine grape
	Mimulus guttatus	Mig	common monkey flower
	Solanum lycopersicum	Sol	tomato
	Aquilegia coerulea	Aqc
Monocots	Sorghum bicolor	Sb	Sorghum
	Oryza sativa	Os	rice
	Setaria italica	Si	foxtail millet
	Panicum virgatum	Pv	switchgrass
	Musa acuminata	Ma	dwarf banana
	Spirodela polyrhiza	Sp	great duckweed
	Brachypodium distachyon	Bd	stiff brome
	Triticum aestivum	Ta	wheat
	Zea mays	Zm	maize
Basal angiosperms	Amborella trichopoda	Am
Gymnosperms	Picea abies	Pa	Norway spruce
Pteridophyta	Selaginella moellendorffii	Sm
Bryophyta	sphagnum fallax	Sf
	Physcomitrella patens	Pp
Chlorophyta	Chlamydomonas reinhardtii	Cr
	Coccomyxa subellipsoidea C-169	Cs
	Micromonas pusilla CCMP1545	Mp
	Ostreococcus lucimarinus	Ol
	Volvox carteri	Vc
Vertebrates	Homo Sapiens	Hs	human
	Mus musculus	Mm	house mouse
Invertebrates	Drosophila melanogaster	Dm	fruit fly
	Caenorhabditis elegans	Ce	roundworm
