# Supplementary material for: Evolutionary Origin, Gradual Accumulation and Functional Divergence of Heat Shock Factor Gene Family with Plant Evolution
Source: Front Plant Sci. 2018 Feb 2;9:71. doi: 10.3389/fpls.2018.00071 (PMC5801592; doi:10.3389/fpls.2018.00071)
Supplement: Supplementary file 6 [file Table6.XLSX]

## Sheet: Supporting Information Table S6
Table S6. The P value of different codon substitution based evolution models
Model 0 VS Model 2 indicates asymmetrical evolution
	Chl	ByrB	ByrAC	PteB	PteAC	GymB	GymAC	A1	A2	A3	A4	A5	A6	A7	A8	A9	B1	B2	B3	B4	B5	C1	C2
Chl		8.489e-06	0.006049	0.857	0.55304	4.114e-05	0.150933	0.0350015	0.711786		0.068621	0.737316	3.693e-05	0.0009469	0.23534	2.258e-07	0.000177	8.216e-06	0.39275	0.0960522	0.01302	8.801e-08	1.809e-12
ByrB			0.130605	0.0028253	0.006796	0.710077	0.004535	0.066636	0.004106	0.147492	0.3195	0.055788	0.50804	0.69654	0.99202	0.00141	0.0025243	0.01931	7.06e-06	0.00194	0.007269	0.279813	0.8845
ByrC				0.225298	0.0002875	0.306685	0.036348	0.577742	0.0120575	0.003622	0.390399	0.389117	0.110525	0.543331	0.0852635	1.446e-05	0.00262	5.398e-05	0.00056354	0.0001005	0.154363	0.15522	0.513465
SmB					0.153371	7.458e-05	0.680913	0.675095	0.314352	0.040555	0.134307	0.14848	0.0021865	0.02805	0.174191	0.00210758	0.0070182	0.049506	0.545248	0.0559582	0.42633	0.0067306	0.0003936
SmC						0.002167	0.0944526	0.0016547	0.0004764	2.865e-06	0.0350795	0.0597287	0.0001787	2.424e-06	0.0217884	2.215e-09	5.148e-05	0.0002653	0.378244	4.335e-05	0.0913114	1.851e-05	1.312e-05
PaB							0.0026291	0.13193	0.0079323	0.177873	0.390817	0.0402243	0.638888	0.590092	0.838	0.0194979	0.00644276	0.00669398	7.247e-05	0.0003959	0.0170065	0.242604	0.607726
PaC								0.462308	0.8346	0.00012434	0.0191858	0.081879	0.006417	0.0897585	0.00128142	5.349e-05	0.140882	0.318207	0.883965	0.55707	0.580765	0.100487	0.008226
Model 3 VS Model D indicates divergent selection pressures and functional divergence
	Chl	ByrB	ByrAC	PteB	PteAC	GymB	GymAC	A1	A2	A3	A4	A5	A6	A7	A8	A9	B1	B2	B3	B4	B5	C1	C2
Chl		0.0154747	0.0121579	0.199354	1	1.785e-06	0.682792	0.0596892	6.213e-07		0.00029767	0.012697	0.004321	0.091351	0	0.002455	0.333619	0.022519	0.000162	0	0.12781	0.00964	0.24859
ByrB			0.049028	0.538085	0.076713	0.003846	0.832926	0.001248	0.035631	0.492987	0.00114	0	0.49097	0.001184	0.062798	0.003024	0.006942	0.640032	0.508332	0.000109	0.156606	0.034032	0.331072
ByrC				0.702582	0.100141	0.41166	0.054799	2.56e-07	0.040979	0.563722	0.778794	0.069733	0.202535	0.151907	0.318353	0.472296	0.198945	1e-09	1.24e-05	0	0.167475	0.007061	0.242863
SmB					0.199327	0.295763	0.000795	0.089887	0.09355	0.000319	0.078838	0.109481	0.081743	0.732311	0.00174	0.358711	0.126389	0.00020339	0.0006118	0.182358	0.027212	0.006585	0.343238
SmC						0.081111	0.762279	0.445451	0.353375	0.35472	0.135687	0.00788	0.598015	0.89357	0.090723	0.103225	0.149769	0.131951	0.031456	3.2e-08	7.46e-05	0.017965	0.388861
PaB							0.230625	0.000339	3.62e-07	0.262923	0.0268816	0.0366157	1.654e-14	5.506e-08	1.02e-07	0.000360299	0.126252	8.25e-07	0.00551719	0.00100556	0.14884	0	0.004081
PaC								0.885325	0.64334	0.704043	0.49239	0.851595	0.409966	0.004617	0.128983	0.339161	0.674138	0.004204	0.051185	0.0001967	0.676406	0.834787	0.001269
Model A VS Model A null indicates positive selection
	Chl	ByrB	ByrAC	PteB	PteAC	GymB	GymAC	A1	A2	A3	A4	A5	A6	A7	A8	A9	B1	B2	B3	B4	B5	C1	C2
Chl		0.004232	0.002347	0.10827	0.326885	0.007498	0.235422	0.00511224	0.0221763		0.002239	0.000274	0.069597	0.415046	0.004984	0.584824	0.0661	0.022519	0.019931	1	0.088772	0.06592	0.05031
ByrB			0.102256	0.416172	0.070575	1	0.047474	7.347e-07	0.003123	0.006993	6.03e-06	0.000369	0.015607	1.47e-05	0.000207	0.005278	0.005204	0.139198	0.032127	0.278335	0.00939	0.00098	0.212561
ByrC				0.042957	1	0.333231	0.177695	0.188615	0.002429	0.139724	0.00054	0.000559	0.159886	0.012555	7.24e-05	1	0.047182	0.184662	0.157944	0.14677	0.209786	0.116437	0.283947
SmB					0.273382	1	0.324057	0.000752	0.000491	0.000464	0.001332	7.5e-05	0.008497	0.001835	2.212e-07	0.00560749	0.0010458	0.317746	0.127868	0.329211	0.022473	0.015741	0.061662
SmC						0.090791	0.920344	0.524109	1	1	0.005772	0.003426	1	1	0.004967	1	0.048323	0.17167	0.097115	1	0.314711	0.018589	0.440953
PaB							0.11606	0.000167	6.27e-06	2.17e-05	0.008711	1.85e-06	0.002481	0.000977	0.00013	0.049981	0.007375	0.063921	0.139615	0.135056	0.012258	0.000466	0.094288
PaC								0.766221	0.007096	0.016521	0.003968	0.0010784	0.025006	0.627256	0.054246	0.755949	0.05763	0.184425	0.093021	0.303397	0.267116	0.016968	0.56749
Degree of freedom (df) = 1 for all the comparisons.
The clade of HSFs in ancient plants was set as background clade and the another clades was set as foreground in each comparison.
The HSFs in pteridophytes were devidid into PteB and PetAC, and the HSFs in gymnosperms were devidid into GymB and GymAC, like HSFs in bryophytes.
The one-ratio model (model 0) and two-ratio model (model 2) were used to detect the different selection pressures (asymmetrical evolution)
The site-specific null discrete model 3 and the branch-site model D were used to detect the different selective pressure affecting specific clades (functional divergence)
the branch-site model (model A) and model A null were used to detect the positive selection that affects some sites on specific lineages
